# Supplementary material for: Motif conservation, stability, and host gene expression are the main drivers of snoRNA expression across vertebrates
Source: Genome Res. 2023 Apr;33(4):525–40. doi: 10.1101/gr.277483.122 (PMC10234308; doi:10.1101/gr.277483.122)
Supplement: Supplemental Material [file supp_gr.277483.122_Supplemental_Table_S1.xlsx]

## Sheet: Supplementary_Table_S1
Table S1: Categorical and numerical features of all human snoRNAs that were used by the expression status predictors
All column names starting or ending with “sno” relate to snoRNAs, whereas those starting or ending with “host” relate to the snoRNA host gene. Column names containing “intron” in it relate to the intron in which the intronic snoRNA is encoded
gene_id_sno	gene_name_sno	abundance_cutoff_2_sno	abundance_cutoff_host	sno_length	box_score_sno	sno_type	sno_target	host_biotype	host_NMD_susceptibility	host_promoter_type	host_function	intron_rank_5prime	intron_length	distance_upstream_exon_sno	distance_downstream_exon_sno	sno_distance_to_branch_point	host_total_intron_number	intron_rank_3prime	relative_intron_rank	sno_stability	sno_terminal_stem_stability	sno_terminal_stem_length_score
ENSG00000199196	AL160394.1	not_expressed	intergenic	128	9	H/ACA	Orphan	intergenic	intergenic	intergenic	intergenic									-27.8	-1.8	4
ENSG00000199212	RNU105C	not_expressed	intergenic	209	6	H/ACA	Orphan	intergenic	intergenic	intergenic	intergenic									-69	-2.4	9
ENSG00000199231	AC069285.1	not_expressed	intergenic	80	5	C/D	Orphan	intergenic	intergenic	intergenic	intergenic									-16.9	-4	6
ENSG00000199266	SNORA60	expressed	host_expressed	134	0	H/ACA	rRNA	non_coding	False	simple_initiation	non_functional_ncRNA	4	1609	641	834	799	5	2	0.4	-44	-0.1	3
ENSG00000199282	AL356754.1	not_expressed	intergenic	131	6	H/ACA	Orphan	intergenic	intergenic	intergenic	intergenic									-35.2	-5.5	6
ENSG00000199293	SNORA21	expressed	host_expressed	132	6	H/ACA	rRNA	protein_coding	False	dual_initiation	Ribosomal protein	2	293	29	132	104	5	4	0.8	-42.7	-6	3
ENSG00000199311	SNORD115-34	expressed	host_expressed	82	0	C/D	Orphan	non_coding	False	simple_initiation	functional_ncRNA	119	383	57	244	216	147	29	0.197279	-15.6	-25.2	18
ENSG00000199321	AL512272.1	not_expressed	host_expressed	73	5	C/D	rRNA	protein_coding	False	simple_initiation	Other	1	151918	18779	133066	133027	2	2	1	-17.9	-6.1	5
ENSG00000199363	SNORA63E	expressed	host_expressed	131	0	H/ACA	Orphan	non_coding	False	simple_initiation	non_functional_ncRNA	2	1503	1303	69	41	3	2	0.666667	-38.8	-5.6	3
ENSG00000199370	AC083849.1	not_expressed	host_expressed	215	8	C/D	Orphan	protein_coding	False	simple_initiation	Other	22	25506	5758	19533	19507	23	2	0.0869565	-66.8	-9.1	11
ENSG00000199390	SNORD114-7	not_expressed	host_expressed	77	2	C/D	Orphan	non_coding	False	simple_initiation	non_functional_ncRNA	22	2836	1923	836	807	36	15	0.416667	-14.5	-5.4	6
ENSG00000199392	AC124254.1	not_expressed	intergenic	127	9	H/ACA	Orphan	intergenic	intergenic	intergenic	intergenic									-36	-3.7	6
ENSG00000199405	SNORA1B	not_expressed	intergenic	133	6	H/ACA	rRNA	intergenic	intergenic	intergenic	intergenic									-35.2	-2.9	4
ENSG00000199411	AL929554.1	not_expressed	host_expressed	86	6	C/D	rRNA	protein_coding	False	dual_initiation	Other	3	7235	5341	1808	1780	12	10	0.833333	-11.5	-11.2	8
ENSG00000199436	SNORD9	expressed	host_expressed	104	3	C/D	Orphan	protein_coding	False	simple_initiation	Other	35	564	255	205	173	38	4	0.105263	-26.7	-12.4	7
ENSG00000199453	SNORD115-12	expressed	host_expressed	82	0	C/D	rRNA	non_coding	False	simple_initiation	functional_ncRNA	84	370	67	221	192	147	64	0.435374	-18.3	-23.9	14
ENSG00000199470	AC011891.1	not_expressed	intergenic	132	6	H/ACA	rRNA	intergenic	intergenic	intergenic	intergenic									-41.4	-1.8	2
ENSG00000199473	SNORA63	not_expressed	intergenic	126	6	H/ACA	Orphan	intergenic	intergenic	intergenic	intergenic									-22.6	-4.9	0
ENSG00000199474	AC092324.1	not_expressed	intergenic	124	6	H/ACA	Orphan	intergenic	intergenic	intergenic	intergenic									-26.2	-3.3	4
ENSG00000199477	SNORA31	expressed	host_expressed	130	0	H/ACA	snRNA	protein_coding	True	dual_initiation	RNA binding, processing, splicing	5	1275	1052	93	52	5	1	0.2	-40.8	-5.9	7
ENSG00000199489	SNORD115-25	expressed	host_expressed	82	1	C/D	Orphan	non_coding	False	simple_initiation	functional_ncRNA	105	3198	1524	1592	1565	147	43	0.292517	-14	-20.3	13
ENSG00000199552	SNORA63	not_expressed	intergenic	132	0	H/ACA	rRNA	intergenic	intergenic	intergenic	intergenic									-34.5	-5.1	5
ENSG00000199566	AC008083.1	not_expressed	intergenic	132	3	H/ACA	rRNA	intergenic	intergenic	intergenic	intergenic									-42	-2.9	4
ENSG00000199571	AC121336.1	not_expressed	host_expressed	134	6	H/ACA	Orphan	protein_coding	False	simple_initiation	Other	7	65248	10221	54893	54856	9	3	0.333333	-32.3	-1.6	4
ENSG00000199574	SNORD18C	expressed	host_expressed	69	3	C/D	rRNA	protein_coding	False	simple_initiation	Ribosomal protein	7	273	58	146	105	10	4	0.4	-14.1	-8.6	8
ENSG00000199575	SNORD114-1	expressed	host_expressed	72	3	C/D	Orphan	non_coding	False	simple_initiation	non_functional_ncRNA	14	809	238	499	481	36	23	0.638889	-23	-4.2	5
ENSG00000199593	SNORD114-14	expressed	host_expressed	75	1	C/D	rRNA	non_coding	False	simple_initiation	non_functional_ncRNA	28	2720	2559	86	61	36	9	0.25	-15.1	-4.7	0
ENSG00000199631	SNORD33	expressed	host_expressed	85	2	C/D	rRNA	protein_coding	False	dual_initiation	Ribosomal protein	4	206	40	81	53	7	4	0.571429	-16.7	-13	7
ENSG00000199633	AC090260.1	not_expressed	intergenic	126	9	H/ACA	Orphan	intergenic	intergenic	intergenic	intergenic									-33.2	-4.6	8
ENSG00000199666	SNORD3G	expressed	intergenic	215	4	C/D	Orphan	intergenic	intergenic	intergenic	intergenic									-72.3	-7.2	7
ENSG00000199673	SNORD16	expressed	host_expressed	99	5	C/D	rRNA	protein_coding	False	simple_initiation	Ribosomal protein	4	311	149	63	30	10	7	0.7	-25.1	-14.2	15
ENSG00000199704	SNORD115-29	expressed	host_expressed	82	0	C/D	rRNA	non_coding	False	simple_initiation	functional_ncRNA	110	388	57	249	220	147	38	0.258503	-18.4	-27	16
ENSG00000199712	SNORD115-2	expressed	host_expressed	82	1	C/D	rRNA	non_coding	False	simple_initiation	functional_ncRNA	64	375	58	235	211	147	84	0.571429	-16.4	-21.7	15
ENSG00000199713	AC104365.1	not_expressed	intergenic	134	4	C/D	Orphan	intergenic	intergenic	intergenic	intergenic									-51.3	-2.8	8
ENSG00000199744	SNORD36A	expressed	host_expressed	73	4	C/D	rRNA	protein_coding	True	dual_initiation	Ribosomal protein	5	281	138	70	51	7	3	0.428571	-9.9	-7.6	7
ENSG00000199753	SNORD104	expressed	host_expressed	70	4	C/D	rRNA	non_coding	False	simple_initiation	non_functional_ncRNA	1	238	89	79	56	1	1	1	-19.7	-13	6
ENSG00000199782	SNORD115-9	expressed	host_expressed	82	0	C/D	rRNA	non_coding	False	simple_initiation	functional_ncRNA	78	389	58	249	222	147	70	0.47619	-18.3	-21.7	13
ENSG00000199783	AL049759.1	not_expressed	intergenic	68	7	C/D	rRNA	intergenic	intergenic	intergenic	intergenic									-16.7	-5.3	4
ENSG00000199785	SNORA52	expressed	host_expressed	134	6	H/ACA	Orphan	protein_coding	True	dual_initiation	Ribosomal protein	3	893	37	722	703	4	2	0.5	-48.9	-7.4	7
ENSG00000199787	SNORA80C	expressed	intergenic	135	0	H/ACA	rRNA	intergenic	intergenic	intergenic	intergenic									-50.1	-0.3	1
ENSG00000199798	SNORD114-5	not_expressed	host_expressed	70	3	C/D	Orphan	non_coding	False	simple_initiation	non_functional_ncRNA	18	882	365	447	419	36	19	0.527778	-13.8	-7.2	4
ENSG00000199833	SNORD115-21	expressed	host_expressed	81	0	C/D	snRNA	non_coding	False	simple_initiation	functional_ncRNA	101	3583	57	3445	3418	147	47	0.319728	-14.3	-25.2	13
ENSG00000199851	AL121944.1	expressed	intergenic	210	5	C/D	rRNA	intergenic	intergenic	intergenic	intergenic									-60	-6.6	4
ENSG00000199856	U3	not_expressed	host_expressed	216	4	C/D	Orphan	protein_coding	False	simple_initiation	Other	7	114275	40157	73902	73872	32	26	0.8125	-75.3	-1.9	4
ENSG00000199857	AC096743.1	not_expressed	intergenic	71	8	C/D	snRNA	intergenic	intergenic	intergenic	intergenic									-6.1	-5.2	8
ENSG00000199894	AC093872.1	not_expressed	intergenic	80	6	C/D	rRNA	intergenic	intergenic	intergenic	intergenic									-13.1	-3.9	6
ENSG00000199914	SNORD114-16	not_expressed	host_expressed	70	3	C/D	Orphan	non_coding	False	simple_initiation	non_functional_ncRNA	29	1783	1250	463	434	36	8	0.222222	-19.1	-7.4	10
ENSG00000199934	AC092807.1	not_expressed	intergenic	77	2	C/D	rRNA	intergenic	intergenic	intergenic	intergenic									-3	-1.9	5
ENSG00000199942	SNORD114-19	not_expressed	host_expressed	75	4	C/D	Orphan	non_coding	False	simple_initiation	non_functional_ncRNA	31	5084	982	4027	4006	36	6	0.166667	-12.9	-4.9	4
ENSG00000199959	AL359273.1	not_expressed	intergenic	137	6	H/ACA	rRNA	intergenic	intergenic	intergenic	intergenic									-35.2	-0.5	3
ENSG00000199960	SNORD115-14	expressed	host_expressed	81	0	C/D	Orphan	non_coding	False	simple_initiation	functional_ncRNA	87	1559	1231	247	219	147	61	0.414966	-14.3	-24	13
ENSG00000199961	SNORD1B	expressed	host_expressed	84	2	C/D	rRNA	non_coding	True	dual_initiation	functional_ncRNA	4	2248	2067	97	65	5	2	0.4	-22.9	-17.3	15
ENSG00000199968	SNORD115-19	expressed	host_expressed	82	0	C/D	rRNA	non_coding	False	simple_initiation	functional_ncRNA	97	387	58	247	219	147	51	0.346939	-20.5	-23.4	14
ENSG00000199970	SNORD115-3	expressed	host_expressed	82	0	C/D	Orphan	non_coding	False	simple_initiation	functional_ncRNA	67	372	58	232	204	147	81	0.55102	-15.5	-21.6	14
ENSG00000199977	SNORA73	not_expressed	host_expressed	205	9	H/ACA	Orphan	protein_coding	True	simple_initiation	Other	11	3685	1812	1668	1644	20	10	0.5	-61.9	-1.8	5
ENSG00000200026	U8	not_expressed	intergenic	134	3	C/D	Orphan	intergenic	intergenic	intergenic	intergenic									-33.7	-2.7	3
ENSG00000200051	AC011399.1	not_expressed	intergenic	77	2	C/D	Orphan	intergenic	intergenic	intergenic	intergenic									-14.5	-7.1	6
ENSG00000200063	AC061992.1	not_expressed	host_expressed	129	6	H/ACA	Orphan	protein_coding	True	simple_initiation	Other	5	1143	399	615	592	9	5	0.555556	-47.5	-4.8	0
ENSG00000200072	AL138691.1	not_expressed	intergenic	61	2	C/D	rRNA	intergenic	intergenic	intergenic	intergenic									-10.7	-5	5
ENSG00000200075	AC022973.1	not_expressed	host_expressed	127	6	H/ACA	Orphan	protein_coding	False	simple_initiation	Other	7	9044	2660	6257	6222	14	8	0.571429	-26.2	-1.7	2
ENSG00000200084	SNORD68	expressed	host_expressed	84	5	C/D	rRNA	protein_coding	False	dual_initiation	Ribosomal protein	3	213	67	62	39	6	4	0.666667	-12.8	-15.5	11
ENSG00000200087	SNORA73B	expressed	host_expressed	204	6	H/ACA	Orphan	non_coding	False	dual_initiation	functional_ncRNA	2	673	400	69	47	2	1	0.5	-72.9	-5.5	0
ENSG00000200089	SNORD114-31	not_expressed	host_expressed	75	3	C/D	Orphan	non_coding	False	simple_initiation	non_functional_ncRNA	17	2273	1672	526	491	28	12	0.428571	-14.9	-2.5	2
ENSG00000200112	AC012157.1	not_expressed	host_not_expressed	71	5	C/D	rRNA	non_coding	False	simple_initiation	non_functional_ncRNA	1	53348	33266	20011	19973	2	2	1	-8.3	-3.7	4
ENSG00000200113	AC078843.1	not_expressed	intergenic	140	3	H/ACA	rRNA	intergenic	intergenic	intergenic	intergenic									-38.6	-2.5	3
ENSG00000200150	AL132709.1	not_expressed	host_expressed	73	5	C/D	Orphan	non_coding	False	simple_initiation	non_functional_ncRNA	19	2316	292	1951	1922	36	18	0.5	-9.6	-6.1	5
ENSG00000200163	SNORD115-18	expressed	host_expressed	82	0	C/D	Orphan	non_coding	False	simple_initiation	functional_ncRNA	95	385	58	245	216	147	53	0.360544	-20.5	-23.4	14
ENSG00000200191	U8	not_expressed	intergenic	132	4	C/D	Orphan	intergenic	intergenic	intergenic	intergenic									-39.2	-4.8	5
ENSG00000200206	AC016180.1	not_expressed	intergenic	73	3	C/D	rRNA	intergenic	intergenic	intergenic	intergenic									-18.9	-1.5	4
ENSG00000200215	SNORD113-6	expressed	host_expressed	75	2	C/D	Orphan	non_coding	False	simple_initiation	non_functional_ncRNA	8	1412	601	736	713	36	29	0.805556	-15.9	-4.8	5
ENSG00000200222	U3	not_expressed	intergenic	213	4	C/D	snRNA	intergenic	intergenic	intergenic	intergenic									-63.8	-7.2	5
ENSG00000200235	AC116353.1	not_expressed	intergenic	126	9	H/ACA	Orphan	intergenic	intergenic	intergenic	intergenic									-28.7	-0.1	0
ENSG00000200237	AC008752.1	not_expressed	intergenic	141	6	H/ACA	Orphan	intergenic	intergenic	intergenic	intergenic									-43.4	-7.1	8
ENSG00000200259	SNORD35A	expressed	host_expressed	86	4	C/D	rRNA	protein_coding	False	dual_initiation	Ribosomal protein	6	329	77	166	143	7	2	0.285714	-23.3	-12.6	9
ENSG00000200279	SNORD114-10	not_expressed	host_expressed	72	1	C/D	Orphan	non_coding	False	simple_initiation	non_functional_ncRNA	25	911	322	517	494	36	12	0.333333	-9.5	-2.5	4
ENSG00000200288	AC026355.1	not_expressed	host_not_expressed	128	6	H/ACA	Orphan	non_coding	False	simple_initiation	non_functional_ncRNA	1	5506	3798	1580	1541	2	2	1	-35.8	-3.8	6
ENSG00000200294	AL607035.1	not_expressed	intergenic	132	9	H/ACA	Orphan	intergenic	intergenic	intergenic	intergenic									-30	-8.7	6
ENSG00000200318	U3	not_expressed	intergenic	216	4	C/D	Orphan	intergenic	intergenic	intergenic	intergenic									-76.4	-5.6	5
ENSG00000200320	SNORA63	expressed	host_expressed	132	0	H/ACA	Orphan	protein_coding	True	dual_initiation	Ribosome biogenesis & translation	8	234	37	65	42	11	4	0.363636	-45.1	-2.7	0
ENSG00000200354	SNORA71D	expressed	host_expressed	134	6	H/ACA	rRNA	non_coding	False	dual_initiation	functional_ncRNA	2	3395	507	2754	2718	8	7	0.875	-49.2	-0.2	0
ENSG00000200355	SNORA72	not_expressed	intergenic	129	3	H/ACA	Orphan	intergenic	intergenic	intergenic	intergenic									-21.6	-0.4	3
ENSG00000200367	SNORD113-8	expressed	host_expressed	74	2	C/D	Orphan	non_coding	False	simple_initiation	non_functional_ncRNA	10	1974	614	1286	1254	36	27	0.75	-20.5	-5.8	4
ENSG00000200377	AC012501.1	not_expressed	host_not_expressed	71	4	C/D	rRNA	non_coding	False	simple_initiation	non_functional_ncRNA	1	26182	2789	23322	23287	2	2	1	-13.5	-4.4	4
ENSG00000200385	AL136296.1	not_expressed	host_expressed	137	6	H/ACA	Orphan	protein_coding	False	simple_initiation	Poorly characterized	6	10105	5630	4338	4313	30	25	0.833333	-31.5	-3.3	4
ENSG00000200394	SNORA38B	expressed	host_expressed	131	0	H/ACA	Orphan	protein_coding	True	dual_initiation	Ribosome biogenesis & translation	16	3874	1062	2681	2655	17	2	0.117647	-44.3	-5.3	7
ENSG00000200398	SNORD115-24	not_expressed	host_expressed	82	3	C/D	Orphan	non_coding	False	simple_initiation	functional_ncRNA	104	387	59	246	217	147	44	0.29932	-15.6	-9.3	5
ENSG00000200406	SNORD114-23	expressed	host_expressed	72	3	C/D	Orphan	non_coding	False	simple_initiation	non_functional_ncRNA	34	809	335	402	374	36	3	0.0833333	-17.2	-7.5	4
ENSG00000200413	SNORD114-26	expressed	host_expressed	72	2	C/D	Orphan	non_coding	False	simple_initiation	non_functional_ncRNA	13	841	341	428	400	28	16	0.571429	-18.8	-7.3	3
ENSG00000200418	SNORA63B	expressed	host_expressed	123	0	H/ACA	Orphan	protein_coding	True	dual_initiation	Ribosome biogenesis & translation	6	232	51	58	36	11	6	0.545455	-28.8	-2.9	4
ENSG00000200422	AL590229.1	expressed	intergenic	72	5	C/D	Orphan	intergenic	intergenic	intergenic	intergenic									-13.4	-3.9	2
ENSG00000200463	SNORD118	expressed	host_expressed	134	3	C/D	rRNA	protein_coding	False	simple_initiation	Other	0	0	0	0	0	4	0	0	-42.3	-7.8	6
ENSG00000200478	SNORD115-41	expressed	host_expressed	82	0	C/D	Orphan	non_coding	False	simple_initiation	functional_ncRNA	132	388	58	248	219	147	16	0.108844	-20.6	-21.4	12
ENSG00000200480	SNORD114-28	expressed	host_expressed	72	2	C/D	Orphan	non_coding	False	simple_initiation	non_functional_ncRNA	15	907	341	494	469	28	14	0.5	-21.8	-5.2	2
ENSG00000200486	SNORD115-11	expressed	host_expressed	82	0	C/D	rRNA	non_coding	False	simple_initiation	functional_ncRNA	82	390	61	247	219	147	66	0.44898	-18.4	-22.4	14
ENSG00000200492	U3	not_expressed	intergenic	211	7	C/D	Orphan	intergenic	intergenic	intergenic	intergenic									-56.2	-5.9	6
ENSG00000200496	U8	expressed	intergenic	134	3	C/D	Orphan	intergenic	intergenic	intergenic	intergenic									-45.4	-1.1	0
ENSG00000200503	SNORD115-5	expressed	host_expressed	82	0	C/D	Orphan	non_coding	False	simple_initiation	functional_ncRNA	70	386	58	246	218	147	78	0.530612	-17.2	-12.7	10
ENSG00000200530	SNORD35B	expressed	host_expressed	87	4	C/D	rRNA	protein_coding	False	dual_initiation	Ribosomal protein	3	325	126	112	87	4	2	0.5	-26.5	-6	8
ENSG00000200534	SNORA33	expressed	host_expressed	130	0	H/ACA	Orphan	protein_coding	True	dual_initiation	Ribosomal protein	5	422	159	133	110	5	1	0.2	-35.9	-3.4	0
ENSG00000200536	AL137790.1	not_expressed	host_not_expressed	124	6	H/ACA	Orphan	protein_coding	False	simple_initiation	Other	1	70360	60308	9928	9901	2	2	1	-27.1	-10.3	9
ENSG00000200538	U3	expressed	host_expressed	216	6	C/D	Orphan	protein_coding	False	simple_initiation	Other	2	32869	14095	18558	18527	13	12	0.923077	-72.3	-6.1	5
ENSG00000200545	U3	not_expressed	host_expressed	217	5	C/D	Orphan	protein_coding	False	simple_initiation	Other	34	12323	2791	9315	9291	39	6	0.153846	-60.2	-3.2	3
ENSG00000200564	SNORD115-39	expressed	host_expressed	82	0	C/D	Orphan	non_coding	False	simple_initiation	functional_ncRNA	126	385	57	246	217	147	22	0.14966	-18.4	-15.8	11
ENSG00000200593	SNORD115-33	expressed	host_expressed	82	0	C/D	snRNA	non_coding	False	simple_initiation	functional_ncRNA	117	388	58	248	219	147	31	0.210884	-17.7	-14.3	8
ENSG00000200608	SNORD114-11	expressed	host_expressed	75	4	C/D	rRNA	non_coding	False	simple_initiation	non_functional_ncRNA	26	865	326	464	427	36	11	0.305556	-20.5	-9.1	9
ENSG00000200612	SNORD114-25	expressed	host_expressed	72	2	C/D	Orphan	non_coding	False	simple_initiation	non_functional_ncRNA	36	882	318	492	464	36	1	0.0277778	-20.2	-4.6	4
ENSG00000200620	AC112497.1	not_expressed	host_expressed	139	6	H/ACA	Orphan	protein_coding	False	simple_initiation	Other	1	32642	27351	5152	5127	4	4	1	-40.5	-3.9	0
ENSG00000200623	SNORD18A	expressed	host_expressed	72	3	C/D	rRNA	protein_coding	False	simple_initiation	Ribosomal protein	3	197	45	80	43	10	8	0.8	-11.1	-7.9	6
ENSG00000200632	SNORD113-7	expressed	host_expressed	77	2	C/D	Orphan	non_coding	False	simple_initiation	non_functional_ncRNA	9	2315	677	1561	1537	36	28	0.777778	-18.6	-6.6	0
ENSG00000200636	SNORD114-27	not_expressed	host_expressed	70	4	C/D	Orphan	non_coding	False	simple_initiation	non_functional_ncRNA	14	1082	532	480	453	28	15	0.535714	-14.8	-5.3	2
ENSG00000200638	SNORD115-37	expressed	host_expressed	82	0	C/D	Orphan	non_coding	False	simple_initiation	functional_ncRNA	123	3200	1534	1584	1557	147	25	0.170068	-15.2	-21.1	12
ENSG00000200652	AC136611.1	not_expressed	intergenic	126	6	H/ACA	Orphan	intergenic	intergenic	intergenic	intergenic									-43.8	-6.2	6
ENSG00000200656	SNORA5B	not_expressed	host_expressed	132	0	H/ACA	rRNA	protein_coding	False	simple_initiation	RNA binding, processing, splicing	2	3066	2729	205	184	10	9	0.9	-46.3	-16.1	13
ENSG00000200661	SNORD116-10	not_expressed	host_expressed	102	3	C/D	rRNA	non_coding	False	simple_initiation	functional_ncRNA	34	1687	64	1521	1490	147	114	0.77551	-19.6	-7.7	6
ENSG00000200677	SNORD18	not_expressed	intergenic	70	5	C/D	rRNA	intergenic	intergenic	intergenic	intergenic									-17.9	-1.8	0
ENSG00000200680	SNORD115-4	expressed	host_expressed	82	0	C/D	rRNA	non_coding	False	simple_initiation	functional_ncRNA	68	1877	1550	245	218	147	80	0.544218	-16.8	-23.9	14
ENSG00000200693	AL136038.1	not_expressed	intergenic	204	4	C/D	Orphan	intergenic	intergenic	intergenic	intergenic									-57.7	-3.4	4
ENSG00000200706	AL033518.1	not_expressed	intergenic	72	3	C/D	Orphan	intergenic	intergenic	intergenic	intergenic									-12.8	-5.3	9
ENSG00000200726	SNORD115-8	expressed	host_expressed	82	0	C/D	Orphan	non_coding	False	simple_initiation	functional_ncRNA	77	1371	232	1057	1029	147	71	0.482993	-16.3	-26.2	16
ENSG00000200733	AL355821.1	not_expressed	intergenic	68	3	C/D	Orphan	intergenic	intergenic	intergenic	intergenic									-13.7	-1.4	3
ENSG00000200753	AC004130.1	not_expressed	host_expressed	71	8	C/D	rRNA	protein_coding	False	simple_initiation	Other	4	11868	10146	1651	1625	14	11	0.785714	-9.4	-2.2	7
ENSG00000200757	SNORD115-16	expressed	host_expressed	82	0	C/D	Orphan	non_coding	False	simple_initiation	functional_ncRNA	91	390	58	250	221	147	57	0.387755	-18.1	-18.3	12
ENSG00000200785	SNORD8	expressed	host_expressed	110	2	C/D	Orphan	protein_coding	False	simple_initiation	Other	28	1934	423	1401	1369	38	11	0.289474	-33	-17.7	8
ENSG00000200792	SNORA80A	expressed	host_expressed	136	0	H/ACA	rRNA	protein_coding	True	dual_initiation	Ribosome biogenesis & translation	5	2965	1124	1705	1667	38	34	0.894737	-46.1	-2.3	5
ENSG00000200801	SNORD115-28	not_expressed	host_expressed	81	1	C/D	Orphan	non_coding	False	simple_initiation	functional_ncRNA	109	772	59	632	607	147	39	0.265306	-14.9	-18	10
ENSG00000200812	SNORD115-6	expressed	host_expressed	82	0	C/D	Orphan	non_coding	False	simple_initiation	functional_ncRNA	72	1373	58	1233	1207	147	76	0.517007	-15.6	-17.2	12
ENSG00000200816	SNORA38	expressed	host_expressed	132	0	H/ACA	Orphan	protein_coding	True	simple_initiation	RNA binding, processing, splicing	2	834	179	523	498	30	29	0.966667	-44.8	-3.2	7
ENSG00000200823	SNORD114-2	not_expressed	host_expressed	78	4	C/D	Orphan	non_coding	False	simple_initiation	non_functional_ncRNA	16	2473	363	2032	2010	36	21	0.583333	-15.5	-6.5	2
ENSG00000200831	SNORD36B	expressed	host_expressed	74	2	C/D	rRNA	protein_coding	True	dual_initiation	Ribosomal protein	4	191	44	73	51	7	4	0.571429	-12.7	-21.3	13
ENSG00000200832	SNORD114-4	not_expressed	host_expressed	75	2	C/D	Orphan	non_coding	False	simple_initiation	non_functional_ncRNA	17	879	329	475	450	36	20	0.555556	-17.4	-6.6	4
ENSG00000200879	SNORD14E	expressed	host_expressed	85	3	C/D	rRNA	protein_coding	True	dual_initiation	RNA binding, processing, splicing	8	336	92	159	119	8	1	0.125	-23.8	-13.2	7
ENSG00000200891	AC063965.1	not_expressed	intergenic	78	2	C/D	rRNA	intergenic	intergenic	intergenic	intergenic									-20.8	-1.4	3
ENSG00000200897	AC009774.1	not_expressed	host_expressed	81	4	C/D	rRNA	protein_coding	False	simple_initiation	Poorly characterized	1	200415	54673	145661	145635	16	16	1	-17.4	-3.5	4
ENSG00000200913	SNORD46	expressed	host_expressed	104	4	C/D	rRNA	protein_coding	True	dual_initiation	Ribosomal protein	2	538	351	83	53	5	4	0.8	-28.3	-16.2	6
ENSG00000200949	SNORD115-32	expressed	host_expressed	82	0	C/D	Orphan	non_coding	False	simple_initiation	functional_ncRNA	115	386	57	247	218	147	33	0.22449	-11.5	-24.2	16
ENSG00000200959	SNORA74A	expressed	host_expressed	198	0	H/ACA	rRNA	non_coding	False	simple_initiation	functional_ncRNA	4	314	42	74	50	6	3	0.5	-82.1	-5.3	6
ENSG00000200969	AL158154.1	expressed	intergenic	68	1	C/D	rRNA	intergenic	intergenic	intergenic	intergenic									-18.2	-3.2	3
ENSG00000200983	SNORA3A	expressed	host_expressed	130	0	H/ACA	rRNA	protein_coding	True	simple_initiation	Ribosomal protein	3	640	147	363	339	4	2	0.5	-57.4	-2.1	4
ENSG00000200987	SNORD115-30	expressed	host_expressed	82	1	C/D	Orphan	non_coding	False	simple_initiation	functional_ncRNA	112	386	58	246	217	147	36	0.244898	-15.9	-18.9	12
ENSG00000200991	AC012291.1	not_expressed	intergenic	118	9	H/ACA	Orphan	intergenic	intergenic	intergenic	intergenic									-34.6	-4	9
ENSG00000200999	AC107390.1	not_expressed	host_expressed	80	2	C/D	rRNA	protein_coding	False	simple_initiation	Poorly characterized	13	29529	13903	15546	15514	20	8	0.4	-15	-6	6
ENSG00000201003	AL049745.1	not_expressed	host_expressed	136	6	H/ACA	Orphan	protein_coding	False	simple_initiation	RNA binding, processing, splicing	17	4299	1177	2986	2950	17	1	0.0588235	-48.6	-6.3	4
ENSG00000201009	AC009365.1	not_expressed	intergenic	104	4	C/D	rRNA	intergenic	intergenic	intergenic	intergenic									-34.8	-3.8	5
ENSG00000201025	SNORD74B	not_expressed	intergenic	73	4	C/D	rRNA	intergenic	intergenic	intergenic	intergenic									-16.8	0	0
ENSG00000201036	AL132709.2	not_expressed	host_expressed	89	3	C/D	Orphan	non_coding	False	simple_initiation	non_functional_ncRNA	31	5084	3507	1488	1467	36	6	0.166667	-16.6	-4	4
ENSG00000201042	AC087863.1	not_expressed	host_not_expressed	131	0	H/ACA	Orphan	non_coding	False	simple_initiation	non_functional_ncRNA	2	23729	2826	20772	20738	4	3	0.75	-40.6	-0.2	2
ENSG00000201129	SNORA58B	expressed	host_expressed	136	6	H/ACA	Orphan	protein_coding	True	dual_initiation	RNA binding, processing, splicing	21	921	698	87	50	26	6	0.230769	-48.4	-2.6	3
ENSG00000201133	AC004830.1	not_expressed	intergenic	144	9	H/ACA	Orphan	intergenic	intergenic	intergenic	intergenic									-30.1	-0.2	2
ENSG00000201143	SNORD115-42	expressed	host_expressed	82	0	C/D	Orphan	non_coding	False	simple_initiation	functional_ncRNA	134	387	58	247	219	147	14	0.0952381	-15.5	-17.3	10
ENSG00000201151	AL135844.1	not_expressed	host_expressed	72	8	C/D	rRNA	protein_coding	True	simple_initiation	Other	10	2668	1392	1204	1169	10	1	0.1	-10.2	-6.7	7
ENSG00000201157	SNORA62	not_expressed	intergenic	154	6	H/ACA	Orphan	intergenic	intergenic	intergenic	intergenic									-41.3	-2.1	4
ENSG00000201209	SNORD42	not_expressed	host_expressed	68	6	C/D	rRNA	protein_coding	False	simple_initiation	Poorly characterized	5	132602	63376	69158	69125	22	18	0.818182	-7.8	-0.8	3
ENSG00000201229	SNORA63D	expressed	host_expressed	132	6	H/ACA	rRNA	non_coding	False	simple_initiation	non_functional_ncRNA	1	4134	3911	91	67	3	3	1	-27.8	-1.9	0
ENSG00000201240	SNORD114-9	expressed	host_expressed	72	1	C/D	Orphan	non_coding	False	simple_initiation	non_functional_ncRNA	24	2209	1591	546	521	36	13	0.361111	-21.1	-5.6	1
ENSG00000201245	AL137139.1	not_expressed	intergenic	127	9	H/ACA	Orphan	intergenic	intergenic	intergenic	intergenic									-23.7	-4.2	4
ENSG00000201247	SNORD114-13	expressed	host_expressed	74	3	C/D	Orphan	non_coding	False	simple_initiation	non_functional_ncRNA	28	2720	335	2311	2286	36	9	0.25	-20.9	-7.5	9
ENSG00000201263	SNORD114-6	not_expressed	host_expressed	72	5	C/D	rRNA	non_coding	False	simple_initiation	non_functional_ncRNA	19	2316	1218	1026	997	36	18	0.5	-20.3	-7.3	7
ENSG00000201264	SNORD73B	expressed	host_expressed	72	3	C/D	Orphan	protein_coding	True	dual_initiation	Ribosomal protein	3	1712	896	744	724	5	3	0.6	-6.8	-9	7
ENSG00000201300	SNORD115-27	not_expressed	host_expressed	82	1	C/D	Orphan	non_coding	False	simple_initiation	functional_ncRNA	108	3190	1526	1582	1555	147	40	0.272109	-18.6	-15.3	9
ENSG00000201302	SNORA65	expressed	host_expressed	130	6	H/ACA	rRNA	protein_coding	True	simple_initiation	Ribosomal protein	4	861	652	79	47	6	3	0.5	-51.3	-1.6	2
ENSG00000201316	AC090919.1	not_expressed	intergenic	145	6	H/ACA	Orphan	intergenic	intergenic	intergenic	intergenic									-39.9	-2.2	4
ENSG00000201318	SNORD114-30	not_expressed	host_expressed	72	5	C/D	Orphan	non_coding	False	simple_initiation	non_functional_ncRNA	17	2273	355	1846	1811	28	12	0.428571	-20.3	-4.9	0
ENSG00000201326	SNORD115-22	expressed	host_expressed	82	0	C/D	Orphan	non_coding	False	simple_initiation	functional_ncRNA	101	3583	1892	1609	1582	147	47	0.319728	-17.9	-20	9
ENSG00000201329	AC022616.1	expressed	intergenic	214	5	C/D	rRNA	intergenic	intergenic	intergenic	intergenic									-67.8	-2.5	5
ENSG00000201330	SNORD32B	not_expressed	intergenic	84	3	C/D	rRNA	intergenic	intergenic	intergenic	intergenic									-24.3	-6.6	4
ENSG00000201331	SNORD115-23	expressed	host_expressed	82	1	C/D	rRNA	non_coding	False	simple_initiation	functional_ncRNA	102	389	59	248	219	147	46	0.312925	-15.2	-24.5	14
ENSG00000201346	U3	not_expressed	intergenic	212	4	C/D	Orphan	intergenic	intergenic	intergenic	intergenic									-68.5	-3.4	9
ENSG00000201348	RNU105B	not_expressed	host_expressed	208	6	H/ACA	Orphan	protein_coding	True	dual_initiation	Other	32	79452	29014	50230	50206	32	1	0.03125	-59.7	-7.9	7
ENSG00000201368	U3	expressed	intergenic	214	4	C/D	Orphan	intergenic	intergenic	intergenic	intergenic									-66.9	-1.3	4
ENSG00000201376	SNORA70	not_expressed	host_expressed	135	6	H/ACA	Orphan	protein_coding	False	dual_initiation	Poorly characterized	2	1345	120	1090	1062	7	6	0.857143	-38.5	0	0
ENSG00000201384	AC007375.1	not_expressed	intergenic	115	6	H/ACA	Orphan	intergenic	intergenic	intergenic	intergenic									-29.4	-5.7	6
ENSG00000201388	SNORA68B	not_expressed	host_expressed	133	6	H/ACA	rRNA	protein_coding	False	simple_initiation	Poorly characterized	22	7829	7190	506	479	28	7	0.25	-42	-0.8	2
ENSG00000201393	SNORA71	not_expressed	host_not_expressed	117	6	H/ACA	Orphan	non_coding	False	simple_initiation	non_functional_ncRNA	1	346087	188262	157708	157689	4	4	1	-26.5	-0.5	4
ENSG00000201398	U8	not_expressed	intergenic	136	4	C/D	Orphan	intergenic	intergenic	intergenic	intergenic									-39	-1.9	6
ENSG00000201403	SNORD14B	expressed	host_expressed	90	3	C/D	rRNA	protein_coding	False	dual_initiation	Ribosomal protein	3	1548	1301	157	122	5	3	0.6	-27.9	-14.1	13
ENSG00000201407	AC079169.1	not_expressed	intergenic	132	6	H/ACA	Orphan	intergenic	intergenic	intergenic	intergenic									-31.2	-6.8	5
ENSG00000201410	AC107024.1	not_expressed	intergenic	72	5	C/D	Orphan	intergenic	intergenic	intergenic	intergenic									-11	-3.1	7
ENSG00000201448	SNORA63C	expressed	host_expressed	129	0	H/ACA	rRNA	protein_coding	False	simple_initiation	Other	10	739	414	196	164	10	1	0.1	-35.3	-6.6	6
ENSG00000201457	SNORA55	expressed	host_expressed	135	6	H/ACA	rRNA	protein_coding	True	dual_initiation	RNA binding, processing, splicing	7	2376	244	1997	1958	15	9	0.6	-50.1	-6.7	5
ENSG00000201465	AC083867.1	not_expressed	intergenic	132	6	H/ACA	rRNA	intergenic	intergenic	intergenic	intergenic									-29.9	-3.5	2
ENSG00000201467	AL732371.1	not_expressed	intergenic	132	6	H/ACA	Orphan	intergenic	intergenic	intergenic	intergenic									-34.6	-3.6	4
ENSG00000201482	SNORD115-17	expressed	host_expressed	82	0	C/D	Orphan	non_coding	False	simple_initiation	functional_ncRNA	93	389	58	249	221	147	55	0.37415	-20.5	-22.5	11
ENSG00000201487	SNORD45B	expressed	host_expressed	72	3	C/D	rRNA	protein_coding	True	dual_initiation	Other	2	599	122	405	381	9	8	0.888889	-15.1	-14.3	11
ENSG00000201500	AL132709.3	not_expressed	host_expressed	78	2	C/D	Orphan	non_coding	False	simple_initiation	non_functional_ncRNA	31	5084	1894	3112	3091	36	6	0.166667	-10.7	-8	7
ENSG00000201502	AC126172.1	not_expressed	intergenic	80	4	C/D	rRNA	intergenic	intergenic	intergenic	intergenic									-16.5	-1.2	4
ENSG00000201512	SNORA71C	expressed	host_expressed	134	6	H/ACA	rRNA	non_coding	False	dual_initiation	functional_ncRNA	3	4541	1239	3168	3132	8	6	0.75	-47.8	0	0
ENSG00000201516	AC093605.1	not_expressed	host_expressed	123	3	H/ACA	rRNA	protein_coding	False	simple_initiation	Poorly characterized	2	14993	1579	13291	13265	30	29	0.966667	-37	-2.4	2
ENSG00000201541	AC004125.1	not_expressed	intergenic	133	6	H/ACA	Orphan	intergenic	intergenic	intergenic	intergenic									-28.5	-3.5	7
ENSG00000201542	SNORA62	not_expressed	host_expressed	152	6	H/ACA	Orphan	protein_coding	False	simple_initiation	Other	1	56278	41190	14936	14911	29	29	1	-28.8	-2	7
ENSG00000201544	SNORA16B	not_expressed	host_expressed	135	9	H/ACA	rRNA	protein_coding	True	dual_initiation	Other	8	7387	3575	3677	3652	12	5	0.416667	-35.9	-4.4	4
ENSG00000201557	SNORD114-15	expressed	host_expressed	72	1	C/D	Orphan	non_coding	False	simple_initiation	non_functional_ncRNA	29	1783	325	1386	1357	36	8	0.222222	-17.8	-5.1	3
ENSG00000201569	SNORD114-17	expressed	host_expressed	75	3	C/D	Orphan	non_coding	False	simple_initiation	non_functional_ncRNA	30	1211	604	532	505	36	7	0.194444	-19.8	-3.8	4
ENSG00000201592	AL732366.1	expressed	host_expressed	80	2	C/D	Orphan	protein_coding	False	dual_initiation	Ribosome biogenesis & translation	2	2701	2155	466	430	6	5	0.833333	-16.8	-4.3	6
ENSG00000201619	AL512326.1	not_expressed	intergenic	141	0	H/ACA	Orphan	intergenic	intergenic	intergenic	intergenic									-41.7	-5.5	6
ENSG00000201634	SNORD115-48	expressed	host_expressed	76	1	C/D	Orphan	non_coding	False	simple_initiation	functional_ncRNA	143	1688	51	1561	1533	147	5	0.0340136	-12.6	-25	14
ENSG00000201643	SNORA14A	expressed	host_expressed	135	6	H/ACA	rRNA	protein_coding	False	simple_initiation	Other	1	38813	28604	10074	10047	15	15	1	-39.3	-3	4
ENSG00000201660	AC095353.1	expressed	intergenic	130	3	H/ACA	Orphan	intergenic	intergenic	intergenic	intergenic									-28.9	-0.5	5
ENSG00000201666	AC121343.1	not_expressed	host_expressed	70	3	C/D	rRNA	protein_coding	False	simple_initiation	Poorly characterized	2	493516	134645	358801	358761	10	9	0.9	-8.3	-1.3	2
ENSG00000201672	SNORD113-4	expressed	host_expressed	75	2	C/D	Orphan	non_coding	False	simple_initiation	non_functional_ncRNA	8	1525	611	839	813	25	18	0.72	-19.5	-8.7	11
ENSG00000201674	AC236668.1	not_expressed	host_expressed	214	5	C/D	rRNA	non_coding	False	simple_initiation	non_functional_ncRNA	2	25236	19155	5867	5832	4	3	0.75	-54.6	-1.3	0
ENSG00000201675	SNORD32A	expressed	host_expressed	84	3	C/D	rRNA	protein_coding	False	dual_initiation	Ribosomal protein	2	313	44	185	166	7	6	0.857143	-18.5	-15.2	7
ENSG00000201679	SNORD115-15	expressed	host_expressed	81	0	C/D	Orphan	non_coding	False	simple_initiation	functional_ncRNA	89	399	64	254	218	147	59	0.401361	-15.4	-24.2	13
ENSG00000201689	SNORD114-29	not_expressed	host_expressed	70	3	C/D	Orphan	non_coding	False	simple_initiation	non_functional_ncRNA	16	1714	312	1332	1298	28	13	0.464286	-10.6	-5.3	3
ENSG00000201700	SNORD113-3	expressed	host_expressed	72	2	C/D	Orphan	non_coding	False	simple_initiation	non_functional_ncRNA	6	22254	16399	5783	5751	36	31	0.861111	-17.4	-4.5	6
ENSG00000201701	AC094019.1	not_expressed	intergenic	128	9	H/ACA	Orphan	intergenic	intergenic	intergenic	intergenic									-35.5	0	0
ENSG00000201710	AL132709.4	not_expressed	host_expressed	75	6	C/D	Orphan	non_coding	False	simple_initiation	non_functional_ncRNA	31	5084	4497	512	491	36	6	0.166667	-12	-6.5	8
ENSG00000201733	AP002748.1	not_expressed	intergenic	140	6	H/ACA	Orphan	intergenic	intergenic	intergenic	intergenic									-49.5	-2	5
ENSG00000201754	SNORD52	expressed	host_expressed	67	2	C/D	rRNA	non_coding	False	simple_initiation	non_functional_ncRNA	3	722	560	95	69	4	2	0.5	-14.5	-14.8	10
ENSG00000201772	SNORA5C	expressed	host_expressed	137	0	H/ACA	rRNA	protein_coding	False	simple_initiation	RNA binding, processing, splicing	3	735	400	198	161	10	8	0.8	-61.1	-9.9	5
ENSG00000201785	SNORD117	expressed	host_expressed	76	4	C/D	rRNA	protein_coding	False	simple_initiation	RNA binding, processing, splicing	5	1018	52	890	853	10	6	0.6	-13.7	-10.4	7
ENSG00000201791	SNORA63	not_expressed	intergenic	119	0	H/ACA	Orphan	intergenic	intergenic	intergenic	intergenic									-25.1	-4.1	5
ENSG00000201807	AL121933.1	not_expressed	intergenic	134	6	H/ACA	Orphan	intergenic	intergenic	intergenic	intergenic									-32.7	-0.9	3
ENSG00000201809	U8	not_expressed	intergenic	135	4	C/D	rRNA	intergenic	intergenic	intergenic	intergenic									-30.4	-8.7	10
ENSG00000201810	U8	not_expressed	intergenic	136	5	C/D	Orphan	intergenic	intergenic	intergenic	intergenic									-32	-5.1	6
ENSG00000201811	SNORA71	not_expressed	intergenic	134	6	H/ACA	rRNA	intergenic	intergenic	intergenic	intergenic									-40.9	-1.8	3
ENSG00000201816	SNORA73	not_expressed	host_not_expressed	201	9	H/ACA	Orphan	non_coding	False	simple_initiation	non_functional_ncRNA	3	121148	101756	19191	19161	8	6	0.75	-68.2	-4.3	5
ENSG00000201823	SNORD48	expressed	host_expressed	64	3	C/D	rRNA	non_coding	False	simple_initiation	non_functional_ncRNA	1	214	64	86	56	4	4	1	-12.7	-13.9	8
ENSG00000201827	AC022296.1	not_expressed	intergenic	130	0	H/ACA	Orphan	intergenic	intergenic	intergenic	intergenic									-26.4	0	0
ENSG00000201831	SNORD115-1	expressed	host_expressed	82	0	C/D	Orphan	non_coding	False	simple_initiation	functional_ncRNA	62	385	58	245	218	147	86	0.585034	-16.9	-14.9	11
ENSG00000201839	SNORD114-3	expressed	host_expressed	75	2	C/D	Orphan	non_coding	False	simple_initiation	non_functional_ncRNA	16	2473	1856	542	520	36	21	0.583333	-19.6	-3.8	4
ENSG00000201847	SNORD31B	not_expressed	host_not_expressed	69	3	C/D	rRNA	protein_coding	False	simple_initiation	Poorly characterized	1	654930	544720	110141	110115	2	2	1	-9.5	-4.5	3
ENSG00000201863	AC098591.1	not_expressed	host_expressed	124	9	H/ACA	rRNA	protein_coding	False	simple_initiation	Other	2	23679	9433	14122	14095	18	17	0.944444	-31.1	-8.6	5
ENSG00000201882	AL732366.2	expressed	host_expressed	70	3	C/D	Orphan	protein_coding	False	dual_initiation	Ribosome biogenesis & translation	2	2701	2405	226	190	6	5	0.833333	-10.9	-12	9
ENSG00000201898	SNORA72	not_expressed	host_expressed	127	9	H/ACA	rRNA	protein_coding	True	simple_initiation	Other	1	13633	3695	9811	9781	2	2	1	-20.8	-2.6	5
ENSG00000201899	SNORD114-24	not_expressed	host_expressed	72	2	C/D	Orphan	non_coding	False	simple_initiation	non_functional_ncRNA	35	1224	344	808	771	36	2	0.0555556	-13	-11.2	4
ENSG00000201907	SNORD115-38	expressed	host_expressed	82	0	C/D	Orphan	non_coding	False	simple_initiation	functional_ncRNA	124	390	58	250	221	147	24	0.163265	-19.2	-18.1	11
ENSG00000201943	SNORD115-10	expressed	host_expressed	81	0	C/D	Orphan	non_coding	False	simple_initiation	functional_ncRNA	80	386	58	247	219	147	68	0.462585	-14.3	-23.9	14
ENSG00000201944	SNORA72	not_expressed	host_expressed	132	9	H/ACA	Orphan	protein_coding	True	dual_initiation	Other	1	20339	18606	1601	1562	6	6	1	-25.3	-8.1	9
ENSG00000201945	SNORA70	not_expressed	intergenic	132	6	H/ACA	Orphan	intergenic	intergenic	intergenic	intergenic									-53.1	-12.5	6
ENSG00000201950	SNORD113-9	expressed	host_expressed	72	2	C/D	Orphan	non_coding	False	simple_initiation	non_functional_ncRNA	11	2165	778	1315	1282	36	26	0.722222	-20	-3.6	3
ENSG00000201957	AC076966.1	not_expressed	intergenic	128	9	H/ACA	Orphan	intergenic	intergenic	intergenic	intergenic									-37.5	-5.5	3
ENSG00000201969	SNORD115-20	expressed	host_expressed	82	0	C/D	Orphan	non_coding	False	simple_initiation	functional_ncRNA	99	388	63	243	213	147	49	0.333333	-19.4	-21.5	13
ENSG00000201980	AC103710.1	not_expressed	host_not_expressed	153	9	H/ACA	Orphan	protein_coding	False	simple_initiation	Other	1	62228	51601	10474	10446	3	3	1	-40	-2	4
ENSG00000201992	SNORD115-35	expressed	host_expressed	82	1	C/D	Orphan	non_coding	False	simple_initiation	functional_ncRNA	121	375	45	248	219	147	27	0.183673	-15.4	-18.3	12
ENSG00000201998	SNORA23	expressed	host_expressed	182	0	H/ACA	rRNA	protein_coding	True	dual_initiation	Other	13	405	145	78	60	24	12	0.5	-50.8	-4.6	3
ENSG00000202023	SNORD81	not_expressed	intergenic	76	1	C/D	rRNA	intergenic	intergenic	intergenic	intergenic									-8	-4.1	7
ENSG00000202031	SNORD38A	expressed	host_expressed	70	1	C/D	rRNA	protein_coding	True	dual_initiation	Ribosomal protein	4	214	55	89	66	5	2	0.4	-19.8	-16.1	13
ENSG00000202048	SNORD114-20	expressed	host_expressed	72	3	C/D	Orphan	non_coding	False	simple_initiation	non_functional_ncRNA	32	1844	342	1430	1405	36	5	0.138889	-16	-4.7	5
ENSG00000202059	AC023271.1	not_expressed	intergenic	134	6	H/ACA	Orphan	intergenic	intergenic	intergenic	intergenic									-26.9	-5.2	7
ENSG00000202093	SNORD58C	expressed	host_expressed	64	4	C/D	rRNA	protein_coding	False	dual_initiation	Ribosomal protein	7	796	52	680	639	7	1	0.142857	-5.9	-11.7	12
ENSG00000202142	SNORD114-18	not_expressed	host_expressed	72	2	C/D	Orphan	non_coding	False	simple_initiation	non_functional_ncRNA	31	5084	330	4682	4661	36	6	0.166667	-11.4	-4	3
ENSG00000202183	AL109931.1	not_expressed	intergenic	147	6	H/ACA	Orphan	intergenic	intergenic	intergenic	intergenic									-26.7	-3	3
ENSG00000202188	SNORD115-31	expressed	host_expressed	82	0	C/D	Orphan	non_coding	False	simple_initiation	functional_ncRNA	114	1734	61	1591	1562	147	34	0.231293	-18.2	-24.2	14
ENSG00000202189	SNORA30B	expressed	host_expressed	129	0	H/ACA	rRNA	protein_coding	False	simple_initiation	Poorly characterized	12	7425	4999	2297	2263	45	34	0.755556	-39.9	-5.1	4
ENSG00000202191	SNORD113-1	not_expressed	host_expressed	69	3	C/D	snRNA	non_coding	False	simple_initiation	non_functional_ncRNA	6	22254	11304	10881	10849	36	31	0.861111	-6.3	-3.8	4
ENSG00000202231	Z95327.1	not_expressed	intergenic	133	6	H/ACA	snRNA	intergenic	intergenic	intergenic	intergenic									-42.6	-0.5	2
ENSG00000202233	U3	expressed	intergenic	227	5	C/D	Orphan	intergenic	intergenic	intergenic	intergenic									-79.3	-5.7	6
ENSG00000202252	SNORD14C	expressed	host_expressed	88	2	C/D	rRNA	protein_coding	True	dual_initiation	RNA binding, processing, splicing	5	215	52	75	35	8	4	0.5	-18.6	-12.8	8
ENSG00000202261	SNORD115-44	expressed	host_expressed	82	0	C/D	Orphan	non_coding	False	simple_initiation	functional_ncRNA	137	368	49	237	208	147	11	0.0748299	-21.3	-20.6	11
ENSG00000202268	U3	not_expressed	intergenic	212	10	C/D	Orphan	intergenic	intergenic	intergenic	intergenic									-61.2	-7.3	5
ENSG00000202269	U8	expressed	intergenic	135	3	C/D	Orphan	intergenic	intergenic	intergenic	intergenic									-32.2	-3.3	4
ENSG00000202270	SNORD114-12	expressed	host_expressed	75	1	C/D	Orphan	non_coding	False	simple_initiation	non_functional_ncRNA	27	738	225	438	413	36	10	0.277778	-17.6	-7.2	6
ENSG00000202275	AL049840.1	not_expressed	host_expressed	77	5	C/D	rRNA	protein_coding	False	simple_initiation	Other	2	12460	24	12359	12321	17	16	0.941176	-8.8	-3.7	4
ENSG00000202283	AL591387.1	not_expressed	intergenic	134	0	H/ACA	Orphan	intergenic	intergenic	intergenic	intergenic									-21.8	0	0
ENSG00000202293	SNORD114-22	expressed	host_expressed	72	1	C/D	Orphan	non_coding	False	simple_initiation	non_functional_ncRNA	33	879	342	465	430	36	4	0.111111	-19.7	-7.8	5
ENSG00000202314	SNORD6	expressed	host_expressed	73	2	C/D	rRNA	protein_coding	True	dual_initiation	Ribosome biogenesis & translation	11	540	180	287	251	13	3	0.230769	-19.6	-3.9	4
ENSG00000202335	AC002350.1	not_expressed	host_expressed	70	2	C/D	Orphan	protein_coding	False	dual_initiation	Other	3	3335	3115	150	122	5	3	0.6	-10.2	-3.6	0
ENSG00000202343	AL078581.1	not_expressed	host_expressed	135	6	H/ACA	Orphan	non_coding	False	simple_initiation	non_functional_ncRNA	2	7020	87	6798	6774	2	1	0.5	-32.1	-5.2	6
ENSG00000202363	SNORA62	expressed	host_expressed	153	6	H/ACA	rRNA	protein_coding	True	dual_initiation	Ribosomal protein	4	653	56	444	415	6	3	0.5	-50.6	-3.6	5
ENSG00000202373	SNORD115-43	expressed	host_expressed	82	0	C/D	rRNA	non_coding	False	simple_initiation	functional_ncRNA	136	1537	52	1403	1376	147	12	0.0816327	-18.4	-15.4	10
ENSG00000202374	SNORA62	not_expressed	host_expressed	151	6	H/ACA	rRNA	non_coding	False	simple_initiation	non_functional_ncRNA	4	58106	14892	43063	43037	9	6	0.666667	-31.9	-3.1	7
ENSG00000202377	SNORA25B	not_expressed	intergenic	128	9	H/ACA	rRNA	intergenic	intergenic	intergenic	intergenic									-38	-7.3	7
ENSG00000202379	SNORA70	not_expressed	intergenic	134	6	H/ACA	Orphan	intergenic	intergenic	intergenic	intergenic									-35.2	-4.8	6
ENSG00000202389	SNORA70	not_expressed	intergenic	135	6	H/ACA	rRNA	intergenic	intergenic	intergenic	intergenic									-40.6	-2.4	5
ENSG00000202400	SNORD82	expressed	host_expressed	70	2	C/D	rRNA	protein_coding	False	dual_initiation	Ribosome biogenesis & translation	5	188	39	79	38	13	9	0.692308	-16.4	-10.7	9
ENSG00000202434	AC010746.1	not_expressed	intergenic	137	0	H/ACA	Orphan	intergenic	intergenic	intergenic	intergenic									-32.2	-4.7	5
ENSG00000202440	SNORD42	not_expressed	intergenic	69	4	C/D	rRNA	intergenic	intergenic	intergenic	intergenic									-11.6	-2.6	3
ENSG00000202449	SNORA63	not_expressed	intergenic	123	0	H/ACA	rRNA	intergenic	intergenic	intergenic	intergenic									-20	-8	7
ENSG00000202479	SNORD14	not_expressed	host_expressed	90	5	C/D	rRNA	protein_coding	True	simple_initiation	Other	1	4528	2342	2096	2060	8	8	1	-15.9	-3.8	6
ENSG00000202498	SNORD116	not_expressed	host_expressed	92	5	C/D	rRNA	protein_coding	False	simple_initiation	Other	71	1157	73	992	949	72	2	0.0277778	-14.5	-7.8	2
ENSG00000202499	SNORD115-36	expressed	host_expressed	82	0	C/D	rRNA	non_coding	False	simple_initiation	functional_ncRNA	122	1793	1467	244	215	147	26	0.176871	-18.4	-33.4	17
ENSG00000202503	SNORD34	expressed	host_expressed	71	4	C/D	rRNA	protein_coding	False	dual_initiation	Ribosomal protein	5	179	41	67	44	7	3	0.428571	-20.2	-13.4	5
ENSG00000202517	AC099331.1	not_expressed	host_expressed	134	6	H/ACA	rRNA	protein_coding	False	simple_initiation	Other	12	10396	4556	5706	5684	16	5	0.3125	-42.3	-4.9	4
ENSG00000202529	SNORD18B	expressed	host_expressed	72	3	C/D	rRNA	protein_coding	False	simple_initiation	Ribosomal protein	5	703	522	109	68	10	6	0.6	-13.4	-5.8	7
ENSG00000202537	AC009408.1	expressed	intergenic	134	4	C/D	Orphan	intergenic	intergenic	intergenic	intergenic									-41.8	-6.4	7
ENSG00000206592	AC016559.1	not_expressed	intergenic	132	6	H/ACA	Orphan	intergenic	intergenic	intergenic	intergenic									-42.7	-2.5	8
ENSG00000206597	SNORA57	expressed	host_not_expressed	149	6	H/ACA	Orphan	protein_coding	False	dual_initiation	Other	1	318	91	78	56	2	2	1	-60.1	-13.5	0
ENSG00000206602	SNORD58A	expressed	host_expressed	65	5	C/D	rRNA	protein_coding	False	dual_initiation	Ribosomal protein	4	481	59	357	321	7	4	0.571429	-6	-14.2	9
ENSG00000206603	SNORA22B	not_expressed	host_expressed	138	6	H/ACA	rRNA	protein_coding	True	dual_initiation	RNA binding, processing, splicing	3	1124	863	123	98	13	11	0.846154	-34.1	-3.9	9
ENSG00000206609	SNORD116-11	expressed	host_expressed	92	3	C/D	rRNA	non_coding	False	simple_initiation	functional_ncRNA	35	994	64	838	806	147	113	0.768707	-14.3	-19.3	13
ENSG00000206611	SNORD24	expressed	host_expressed	75	1	C/D	rRNA	protein_coding	True	dual_initiation	Ribosomal protein	2	512	355	82	56	7	6	0.857143	-13.5	-15.4	10
ENSG00000206612	SNORA2A	expressed	host_expressed	135	6	H/ACA	rRNA	protein_coding	True	simple_initiation	Other	8	5309	3585	1589	1550	9	2	0.222222	-44	-8.9	8
ENSG00000206620	SNORD45C	expressed	host_expressed	79	2	C/D	rRNA	protein_coding	True	dual_initiation	Other	1	1226	799	348	322	8	8	1	-14.5	-11.8	11
ENSG00000206621	SNORD116-14	expressed	host_expressed	92	2	C/D	rRNA	non_coding	False	simple_initiation	functional_ncRNA	37	2099	1148	859	827	147	111	0.755102	-18.2	-12.7	11
ENSG00000206622	SNORA69	expressed	host_expressed	132	0	H/ACA	rRNA	protein_coding	True	dual_initiation	Ribosomal protein	2	3179	2425	622	584	2	1	0.5	-50.3	-1.6	2
ENSG00000206630	SNORD60	expressed	host_expressed	83	2	C/D	rRNA	non_coding	False	dual_initiation	non_functional_ncRNA	1	224	39	102	69	1	1	1	-13.4	-10.3	11
ENSG00000206633	SNORA80B	expressed	host_expressed	136	0	H/ACA	rRNA	protein_coding	True	dual_initiation	Other	1	2860	1273	1451	1417	11	11	1	-63.3	-3.6	6
ENSG00000206634	SNORA22	expressed	host_expressed	134	0	H/ACA	rRNA	non_coding	True	simple_initiation	non_functional_ncRNA	3	1122	866	122	97	13	11	0.846154	-35.8	-6.7	7
ENSG00000206637	SNORA70H	expressed	intergenic	135	6	H/ACA	rRNA	intergenic	intergenic	intergenic	intergenic									-46.7	-3.2	4
ENSG00000206647	AC007240.1	not_expressed	intergenic	135	6	H/ACA	Orphan	intergenic	intergenic	intergenic	intergenic									-36.1	-4	8
ENSG00000206649	AC104212.1	not_expressed	intergenic	131	0	H/ACA	Orphan	intergenic	intergenic	intergenic	intergenic									-25	-3.6	7
ENSG00000206650	SNORA70G	not_expressed	intergenic	142	6	H/ACA	rRNA	intergenic	intergenic	intergenic	intergenic									-48.2	-7	4
ENSG00000206656	SNORD116-17	expressed	host_expressed	92	2	C/D	rRNA	non_coding	False	simple_initiation	functional_ncRNA	40	1666	62	1512	1480	147	108	0.734694	-18.4	-19.7	15
ENSG00000206661	SNORA70	not_expressed	intergenic	134	6	H/ACA	Orphan	intergenic	intergenic	intergenic	intergenic									-40.5	-4.5	6
ENSG00000206680	SNORD21	expressed	host_expressed	95	1	C/D	rRNA	protein_coding	True	dual_initiation	Ribosomal protein	5	1067	898	74	51	7	3	0.428571	-21	-8.1	6
ENSG00000206688	SNORD116-18	expressed	host_expressed	92	2	C/D	rRNA	non_coding	False	simple_initiation	functional_ncRNA	41	1191	64	1035	1007	147	107	0.727891	-17.1	-15	15
ENSG00000206693	SNORA56	expressed	host_expressed	129	6	H/ACA	rRNA	protein_coding	True	dual_initiation	Ribosome biogenesis & translation	12	493	294	70	47	14	3	0.214286	-48.8	-8	6
ENSG00000206727	SNORD116-9	expressed	host_expressed	95	2	C/D	rRNA	non_coding	False	simple_initiation	functional_ncRNA	33	1032	245	692	664	147	115	0.782313	-17.9	-16.8	12
ENSG00000206731	AC074091.1	not_expressed	intergenic	127	6	H/ACA	Orphan	intergenic	intergenic	intergenic	intergenic									-31.8	-0.9	3
ENSG00000206754	SNORD101	expressed	host_expressed	73	3	C/D	Orphan	protein_coding	True	dual_initiation	Ribosomal protein	3	1376	220	1083	1052	5	3	0.6	-16.2	-14.8	10
ENSG00000206755	SNORA30	expressed	host_not_expressed	129	0	H/ACA	rRNA	protein_coding	True	simple_initiation	Other	8	629	410	90	57	33	26	0.787879	-45.4	-7.6	6
ENSG00000206760	SNORA6	expressed	host_expressed	151	0	H/ACA	rRNA	protein_coding	True	dual_initiation	Ribosomal protein	2	823	604	68	44	6	5	0.833333	-49.5	-3.5	4
ENSG00000206775	SNORD37	expressed	host_expressed	66	4	C/D	rRNA	protein_coding	False	dual_initiation	Ribosome biogenesis & translation	4	386	236	84	52	14	11	0.785714	-13.4	-14.9	7
ENSG00000206776	AC021733.1	not_expressed	intergenic	122	0	H/ACA	Orphan	intergenic	intergenic	intergenic	intergenic									-22.9	-2.6	3
ENSG00000206780	SNORA75B	not_expressed	intergenic	137	0	H/ACA	rRNA	intergenic	intergenic	intergenic	intergenic									-40.2	-5	5
ENSG00000206785	SNORA15B-2	expressed	host_expressed	135	0	H/ACA	Orphan	non_coding	True	simple_initiation	non_functional_ncRNA	10	429	55	239	210	13	4	0.307692	-39.4	-1.6	3
ENSG00000206799	SNORA32	expressed	host_expressed	121	0	H/ACA	Orphan	protein_coding	True	dual_initiation	Ribosome biogenesis & translation	12	441	52	268	229	13	2	0.153846	-37	-2	4
ENSG00000206811	SNORA10	expressed	host_expressed	133	0	H/ACA	rRNA	protein_coding	False	dual_initiation	Ribosomal protein	6	230	32	65	31	6	1	0.166667	-40.9	-5.5	5
ENSG00000206834	SNORA1	expressed	host_expressed	130	6	H/ACA	rRNA	protein_coding	True	dual_initiation	Ribosome biogenesis & translation	10	448	112	206	172	13	4	0.307692	-38	-2.2	3
ENSG00000206838	SNORA5A	expressed	host_expressed	134	0	H/ACA	rRNA	protein_coding	False	simple_initiation	RNA binding, processing, splicing	4	285	57	94	59	10	7	0.7	-46.1	-8.6	3
ENSG00000206849	AC079969.1	not_expressed	host_expressed	132	6	H/ACA	Orphan	protein_coding	False	simple_initiation	Other	1	177639	4637	172870	172841	6	6	1	-32.7	-4.2	0
ENSG00000206853	AC087698.1	not_expressed	intergenic	131	9	H/ACA	rRNA	intergenic	intergenic	intergenic	intergenic									-25.6	-5.9	3
ENSG00000206869	SNORA70F	not_expressed	host_expressed	135	9	H/ACA	rRNA	protein_coding	False	dual_initiation	Poorly characterized	16	6192	4445	1612	1572	16	1	0.0625	-45.9	-6.9	8
ENSG00000206878	AL713899.1	not_expressed	intergenic	125	6	H/ACA	rRNA	intergenic	intergenic	intergenic	intergenic									-26.9	-1.3	2
ENSG00000206885	SNORA75	expressed	host_expressed	137	0	H/ACA	rRNA	protein_coding	False	dual_initiation	Ribosome biogenesis & translation	12	389	75	177	142	13	2	0.153846	-37.8	-9.3	9
ENSG00000206886	SNORA70	not_expressed	intergenic	133	6	H/ACA	Orphan	intergenic	intergenic	intergenic	intergenic									-37.2	-1.8	5
ENSG00000206897	SNORA9B	expressed	host_expressed	133	0	H/ACA	rRNA	protein_coding	True	simple_initiation	RNA binding, processing, splicing	10	1158	106	919	892	13	4	0.307692	-45.8	-1.5	6
ENSG00000206898	AC007240.2	not_expressed	host_not_expressed	134	6	H/ACA	rRNA	non_coding	False	simple_initiation	non_functional_ncRNA	2	11630	4663	6833	6812	3	2	0.666667	-42.1	0	0
ENSG00000206901	SNORA72	not_expressed	intergenic	132	9	H/ACA	Orphan	intergenic	intergenic	intergenic	intergenic									-31.7	-4.7	7
ENSG00000206903	SNORA24B	expressed	host_not_expressed	131	6	H/ACA	rRNA	protein_coding	False	simple_initiation	Other	1	15184	663	14390	14352	5	5	1	-33	-4.1	6
ENSG00000206909	SNORA70J	not_expressed	host_not_expressed	135	6	H/ACA	rRNA	non_coding	False	simple_initiation	non_functional_ncRNA	2	593	5	453	424	3	2	0.666667	-49.4	-9.6	4
ENSG00000206910	SNORA29	not_expressed	host_expressed	140	3	H/ACA	Orphan	protein_coding	True	dual_initiation	RNA binding, processing, splicing	4	407	168	99	70	11	8	0.727273	-28.4	-1.7	4
ENSG00000206913	AP000577.1	not_expressed	host_not_expressed	139	6	H/ACA	Orphan	protein_coding	False	simple_initiation	Other	15	11925	7372	4414	4373	15	1	0.0666667	-46.3	-6.3	5
ENSG00000206937	SNORA70B	not_expressed	host_expressed	135	6	H/ACA	rRNA	protein_coding	True	simple_initiation	Other	2	14621	3369	11117	11082	79	78	0.987342	-45.5	-7.9	7
ENSG00000206941	SNORD15A	expressed	host_expressed	148	1	C/D	rRNA	protein_coding	True	dual_initiation	Ribosomal protein	1	1120	815	157	129	6	6	1	-46.1	-12.1	7
ENSG00000206947	SNORA20B	expressed	intergenic	132	0	H/ACA	rRNA	intergenic	intergenic	intergenic	intergenic									-26.2	-6.1	8
ENSG00000206948	SNORA36A	expressed	host_expressed	132	6	H/ACA	rRNA	protein_coding	True	dual_initiation	Ribosome biogenesis & translation	8	738	97	509	480	14	7	0.5	-47.6	-7.7	0
ENSG00000206958	SNORA70	not_expressed	host_expressed	136	9	H/ACA	Orphan	non_coding	True	simple_initiation	non_functional_ncRNA	6	117433	90130	27167	27145	7	2	0.285714	-52.4	-3.4	4
ENSG00000206961	AC009967.1	not_expressed	host_expressed	132	0	H/ACA	rRNA	protein_coding	False	simple_initiation	Poorly characterized	3	37485	30342	7011	6986	5	3	0.6	-33.4	-7.7	11
ENSG00000206976	AC087441.1	not_expressed	host_expressed	137	6	H/ACA	Orphan	protein_coding	False	simple_initiation	Other	1	111146	66159	44850	44823	12	12	1	-36.3	-5.1	0
ENSG00000206977	AL365205.2	not_expressed	intergenic	140	6	H/ACA	Orphan	intergenic	intergenic	intergenic	intergenic									-39.9	-1.6	4
ENSG00000206979	SNORD61	expressed	host_expressed	73	1	C/D	rRNA	protein_coding	True	dual_initiation	RNA binding, processing, splicing	2	199	49	77	46	8	7	0.875	-9.6	-5.8	8
ENSG00000206987	AC135983.1	not_expressed	host_not_expressed	133	4	C/D	Orphan	non_coding	False	simple_initiation	non_functional_ncRNA	1	3507	1793	1581	1548	4	4	1	-38.4	-3.4	0
ENSG00000206989	SNORD63	expressed	host_expressed	68	5	C/D	rRNA	protein_coding	True	dual_initiation	RNA binding, processing, splicing	10	1492	471	953	917	16	7	0.4375	-10.6	-11.1	15
ENSG00000207001	SNORD116-2	expressed	host_expressed	95	2	C/D	rRNA	non_coding	False	simple_initiation	functional_ncRNA	25	2519	244	2180	2148	147	123	0.836735	-18.7	-16.8	12
ENSG00000207002	AC020634.1	not_expressed	intergenic	131	6	H/ACA	Orphan	intergenic	intergenic	intergenic	intergenic									-43.3	-1.2	3
ENSG00000207008	SNORA54	expressed	host_expressed	123	0	H/ACA	rRNA	protein_coding	True	dual_initiation	RNA binding, processing, splicing	8	4774	788	3863	3822	15	8	0.533333	-41.3	-10.1	3
ENSG00000207014	SNORD116-3	expressed	host_expressed	95	2	C/D	rRNA	non_coding	False	simple_initiation	functional_ncRNA	26	2536	239	2202	2170	147	122	0.829932	-17.9	-16.8	12
ENSG00000207016	SNORA36C	expressed	host_expressed	132	6	H/ACA	rRNA	protein_coding	False	dual_initiation	Other	11	1597	661	804	766	21	11	0.52381	-45	-3.1	3
ENSG00000207022	AL162740.1	not_expressed	intergenic	124	6	H/ACA	rRNA	intergenic	intergenic	intergenic	intergenic									-39.3	-3	5
ENSG00000207027	AC012119.1	not_expressed	intergenic	149	0	H/ACA	Orphan	intergenic	intergenic	intergenic	intergenic									-49.1	-4	3
ENSG00000207031	SNORD59A	expressed	host_expressed	75	2	C/D	rRNA	protein_coding	False	dual_initiation	Other	2	219	71	73	36	9	8	0.888889	-15	-14	12
ENSG00000207047	SNORD51	expressed	host_expressed	80	1	C/D	rRNA	protein_coding	True	dual_initiation	Ribosome biogenesis & translation	5	569	407	82	55	7	3	0.428571	-17.3	-12.5	6
ENSG00000207051	SNORA27	expressed	host_expressed	126	6	H/ACA	rRNA	protein_coding	False	dual_initiation	Ribosomal protein	4	833	48	659	636	5	2	0.4	-37.3	-1.7	0
ENSG00000207062	SNORA15B-1	expressed	host_expressed	135	0	H/ACA	Orphan	non_coding	True	simple_initiation	non_functional_ncRNA	8	428	55	238	209	11	4	0.363636	-39.4	-1.6	3
ENSG00000207063	SNORD116-1	expressed	host_expressed	95	2	C/D	rRNA	non_coding	False	simple_initiation	functional_ncRNA	24	2595	242	2258	2226	147	124	0.843537	-17	-12.9	10
ENSG00000207067	SNORA72	expressed	host_expressed	132	9	H/ACA	Orphan	protein_coding	True	dual_initiation	Ribosomal protein	4	798	429	237	201	4	1	0.25	-43.6	-2.9	7
ENSG00000207084	SNORA72	expressed	intergenic	132	9	H/ACA	Orphan	intergenic	intergenic	intergenic	intergenic									-31	-5.7	3
ENSG00000207088	SNORA7B	expressed	host_expressed	139	0	H/ACA	rRNA	non_coding	True	simple_initiation	non_functional_ncRNA	1	1871	1661	71	35	4	4	1	-49.6	-8.9	6
ENSG00000207093	SNORD116-8	expressed	host_expressed	95	2	C/D	rRNA	non_coding	False	simple_initiation	functional_ncRNA	32	2469	174	2200	2168	147	116	0.789116	-20	-21	14
ENSG00000207094	AC002069.1	not_expressed	intergenic	140	0	H/ACA	rRNA	intergenic	intergenic	intergenic	intergenic									-44.3	-5	0
ENSG00000207098	SNORA70	not_expressed	intergenic	135	6	H/ACA	Orphan	intergenic	intergenic	intergenic	intergenic									-42.4	-8	7
ENSG00000207100	Z77249.1	not_expressed	intergenic	139	6	H/ACA	Orphan	intergenic	intergenic	intergenic	intergenic									-39.8	-7.2	6
ENSG00000207109	SNORD38C	not_expressed	host_expressed	69	3	C/D	Orphan	protein_coding	False	simple_initiation	RNA binding, processing, splicing	3	22674	9017	13588	13552	9	7	0.777778	-9	-3.2	3
ENSG00000207112	SNORA25	expressed	host_expressed	134	9	H/ACA	rRNA	protein_coding	True	dual_initiation	Ribosome biogenesis & translation	13	233	32	67	26	13	1	0.0769231	-46.8	-5.6	5
ENSG00000207118	SNORD14D	expressed	host_expressed	87	4	C/D	rRNA	protein_coding	True	dual_initiation	RNA binding, processing, splicing	6	232	65	80	41	8	3	0.375	-14.5	-8.7	4
ENSG00000207119	U3	not_expressed	intergenic	209	4	C/D	Orphan	intergenic	intergenic	intergenic	intergenic									-64.4	-5.4	3
ENSG00000207130	AC079945.1	not_expressed	intergenic	135	6	H/ACA	Orphan	intergenic	intergenic	intergenic	intergenic									-35.2	0	0
ENSG00000207133	SNORD116-7	expressed	host_expressed	95	2	C/D	rRNA	non_coding	False	simple_initiation	functional_ncRNA	31	5268	2934	2239	2207	147	117	0.795918	-18.6	-18.8	12
ENSG00000207137	SNORD116-13	expressed	host_expressed	92	2	C/D	rRNA	non_coding	False	simple_initiation	functional_ncRNA	37	2099	64	1943	1911	147	111	0.755102	-17.4	-12.5	7
ENSG00000207145	SNORA18	expressed	host_expressed	132	6	H/ACA	rRNA	protein_coding	True	dual_initiation	Ribosome biogenesis & translation	7	1231	1029	70	32	11	5	0.454545	-41	-1.6	5
ENSG00000207147	AF064863.1	not_expressed	intergenic	136	6	H/ACA	rRNA	intergenic	intergenic	intergenic	intergenic									-25	-8.6	2
ENSG00000207165	SNORA70	expressed	host_expressed	135	6	H/ACA	rRNA	protein_coding	False	simple_initiation	Ribosomal protein	5	526	341	50	28	6	2	0.333333	-51.1	-8	8
ENSG00000207166	SNORA68	expressed	host_expressed	133	0	H/ACA	rRNA	protein_coding	False	simple_initiation	Ribosomal protein	4	698	366	199	174	5	2	0.4	-49	-5.9	6
ENSG00000207168	SNORA15	expressed	host_expressed	133	0	H/ACA	rRNA	protein_coding	True	dual_initiation	RNA binding, processing, splicing	10	394	55	206	177	13	4	0.307692	-39.2	-3.1	0
ENSG00000207171	AC079926.1	not_expressed	intergenic	131	6	H/ACA	rRNA	intergenic	intergenic	intergenic	intergenic									-40.1	-3.2	5
ENSG00000207174	SNORD116-15	expressed	host_expressed	92	2	C/D	rRNA	non_coding	False	simple_initiation	functional_ncRNA	38	1368	64	1212	1180	147	110	0.748299	-18.2	-22.2	13
ENSG00000207177	AC008650.1	expressed	host_expressed	134	6	H/ACA	rRNA	protein_coding	False	simple_initiation	Other	1	59266	41701	17431	17393	13	13	1	-29.5	-2.9	5
ENSG00000207181	SNORA14B	expressed	host_expressed	135	6	H/ACA	rRNA	protein_coding	True	dual_initiation	Other	1	6226	659	5432	5394	4	4	1	-42.1	-5.5	7
ENSG00000207187	SNORA10B	expressed	intergenic	133	6	H/ACA	rRNA	intergenic	intergenic	intergenic	intergenic									-38.1	-5.1	5
ENSG00000207191	SNORD116-5	expressed	host_expressed	95	2	C/D	rRNA	non_coding	False	simple_initiation	functional_ncRNA	30	2630	246	2289	2257	147	118	0.802721	-18.6	-16.8	12
ENSG00000207197	SNORD116-12	expressed	host_expressed	92	2	C/D	rRNA	non_coding	False	simple_initiation	functional_ncRNA	36	1875	62	1721	1689	147	112	0.761905	-11.6	-9.9	6
ENSG00000207199	SNORD38D	expressed	intergenic	69	3	C/D	Orphan	intergenic	intergenic	intergenic	intergenic									-7.6	-3.5	5
ENSG00000207215	SNORD3H	expressed	intergenic	214	4	C/D	rRNA	intergenic	intergenic	intergenic	intergenic									-64	-4.4	6
ENSG00000207217	SNORA80D	expressed	host_expressed	135	0	H/ACA	rRNA	protein_coding	True	dual_initiation	RNA binding, processing, splicing	3	2465	1526	804	775	4	2	0.5	-53.7	-3.4	5
ENSG00000207221	SNORA70E	not_expressed	host_expressed	135	6	H/ACA	rRNA	protein_coding	False	simple_initiation	Other	1	37422	30094	7193	7162	5	5	1	-37.6	-0.8	3
ENSG00000207233	SNORA37	expressed	host_expressed	129	0	H/ACA	rRNA	protein_coding	False	simple_initiation	Other	1	18864	1607	17128	17088	6	6	1	-45.9	-4	6
ENSG00000207241	SNORD45A	expressed	host_expressed	84	3	C/D	rRNA	protein_coding	True	dual_initiation	Other	1	1558	286	1188	1166	9	9	1	-19.8	-16.1	15
ENSG00000207244	SNORA70	not_expressed	host_not_expressed	134	6	H/ACA	Orphan	non_coding	False	simple_initiation	non_functional_ncRNA	1	1197	322	741	719	2	2	1	-43.7	-3.8	4
ENSG00000207245	SNORD116-29	expressed	host_expressed	83	2	C/D	rRNA	non_coding	False	simple_initiation	functional_ncRNA	52	1181	228	870	849	147	96	0.653061	-12.4	-15	10
ENSG00000207249	SNORA72	not_expressed	intergenic	129	9	H/ACA	Orphan	intergenic	intergenic	intergenic	intergenic									-27.7	-7.3	3
ENSG00000207263	SNORD116-16	expressed	host_expressed	92	2	C/D	rRNA	non_coding	False	simple_initiation	functional_ncRNA	39	694	64	538	510	147	109	0.741497	-17.2	-15	15
ENSG00000207268	SNORA70C	not_expressed	host_expressed	135	6	H/ACA	rRNA	protein_coding	False	simple_initiation	Other	3	72883	33159	39589	39553	22	20	0.909091	-51.2	-8.7	6
ENSG00000207274	SNORA70I	expressed	host_not_expressed	135	0	H/ACA	rRNA	non_coding	False	simple_initiation	non_functional_ncRNA	2	113723	12843	100745	100714	3	2	0.666667	-47.5	-1.8	4
ENSG00000207279	SNORD116-24	expressed	host_expressed	92	2	C/D	rRNA	non_coding	False	simple_initiation	functional_ncRNA	46	1656	64	1500	1469	147	102	0.693878	-16.9	-15	10
ENSG00000207280	SNORD20	expressed	host_expressed	80	1	C/D	rRNA	protein_coding	False	dual_initiation	Ribosome biogenesis & translation	11	498	109	309	278	13	3	0.230769	-16.5	-15.2	9
ENSG00000207297	SNORD7	expressed	host_not_expressed	97	2	C/D	rRNA	non_coding	False	simple_initiation	non_functional_ncRNA	1	5379	5157	125	101	1	1	1	-26.4	-5.6	4
ENSG00000207299	AP000648.1	not_expressed	intergenic	71	9	C/D	rRNA	intergenic	intergenic	intergenic	intergenic									-11.4	-4	4
ENSG00000207304	SNORA8	expressed	host_expressed	139	0	H/ACA	rRNA	protein_coding	True	dual_initiation	Ribosome biogenesis & translation	9	799	589	71	30	13	5	0.384615	-36.8	-5.5	5
ENSG00000207313	SNORA2B	expressed	host_expressed	137	0	H/ACA	rRNA	protein_coding	True	simple_initiation	Other	7	7077	101	6839	6802	9	3	0.333333	-49.6	-3.9	3
ENSG00000207344	SNORA22C	expressed	host_expressed	134	0	H/ACA	rRNA	non_coding	True	simple_initiation	non_functional_ncRNA	1	1123	867	122	97	11	11	1	-33.8	-6.7	7
ENSG00000207375	SNORD116-23	expressed	host_expressed	92	2	C/D	rRNA	non_coding	False	simple_initiation	functional_ncRNA	45	2118	68	1958	1928	147	103	0.70068	-17.3	-15.3	10
ENSG00000207392	SNORA20	expressed	host_expressed	132	0	H/ACA	rRNA	protein_coding	True	dual_initiation	RNA binding, processing, splicing	9	359	63	164	130	11	3	0.272727	-42.3	-2.1	4
ENSG00000207405	SNORA64	expressed	host_expressed	134	6	H/ACA	rRNA	protein_coding	False	dual_initiation	Ribosomal protein	4	243	44	65	21	6	3	0.5	-51	-12.1	7
ENSG00000207406	SNORA41	expressed	host_expressed	132	6	H/ACA	Orphan	protein_coding	True	dual_initiation	Ribosome biogenesis & translation	6	388	125	131	99	7	2	0.285714	-41.5	-9.1	8
ENSG00000207407	AC023950.1	not_expressed	intergenic	136	6	H/ACA	rRNA	intergenic	intergenic	intergenic	intergenic									-32.9	-5.6	5
ENSG00000207410	AC007448.1	expressed	host_not_expressed	139	6	H/ACA	Orphan	non_coding	False	simple_initiation	non_functional_ncRNA	4	11368	11156	73	51	4	1	0.25	-30.7	-6.3	10
ENSG00000207419	AL022724.1	not_expressed	intergenic	142	6	H/ACA	Orphan	intergenic	intergenic	intergenic	intergenic									-44	-2	5
ENSG00000207430	AC026150.1	not_expressed	host_expressed	133	4	C/D	rRNA	non_coding	False	simple_initiation	non_functional_ncRNA	2	3485	1773	1579	1552	5	4	0.8	-40.2	-2.1	0
ENSG00000207432	U8	not_expressed	host_expressed	133	4	C/D	Orphan	non_coding	True	simple_initiation	non_functional_ncRNA	1	3556	1824	1599	1572	4	4	1	-39.9	-2.1	0
ENSG00000207442	SNORD116-6	expressed	host_expressed	96	2	C/D	rRNA	non_coding	False	simple_initiation	functional_ncRNA	31	5268	172	5000	4968	147	117	0.795918	-20.1	-14.7	12
ENSG00000207444	SNORD56B	not_expressed	host_expressed	71	8	C/D	rRNA	protein_coding	False	simple_initiation	Other	2	79616	77157	2388	2364	8	7	0.875	-14	-9	11
ENSG00000207445	SNORD15B	expressed	host_expressed	146	3	C/D	rRNA	protein_coding	True	dual_initiation	Ribosomal protein	5	468	215	107	87	6	2	0.333333	-44	-16.8	13
ENSG00000207460	SNORD116-19	expressed	host_expressed	92	2	C/D	rRNA	non_coding	False	simple_initiation	functional_ncRNA	41	2148	1206	850	822	147	107	0.727891	-18.4	-14.3	10
ENSG00000207468	SNORA19	expressed	host_expressed	128	0	H/ACA	Orphan	protein_coding	False	dual_initiation	Ribosome biogenesis & translation	9	1031	609	294	252	22	14	0.636364	-36.9	-2.5	6
ENSG00000207475	SNORA80E	expressed	host_expressed	137	6	H/ACA	rRNA	protein_coding	False	simple_initiation	RNA binding, processing, splicing	10	3706	1331	2238	2212	13	4	0.307692	-54.1	-1.8	3
ENSG00000207493	SNORA46	expressed	host_expressed	135	0	H/ACA	rRNA	protein_coding	True	dual_initiation	RNA binding, processing, splicing	25	2040	1087	818	785	49	25	0.510204	-44.2	-7.3	7
ENSG00000207496	SNORA7A	expressed	host_expressed	139	0	H/ACA	rRNA	protein_coding	False	dual_initiation	Ribosomal protein	1	1255	1045	71	35	3	3	1	-53.5	-8.9	6
ENSG00000207500	SNORD102	expressed	host_expressed	72	3	C/D	rRNA	protein_coding	False	dual_initiation	Ribosomal protein	3	964	784	108	86	5	3	0.6	-14.5	-16	14
ENSG00000207502	AL592436.1	not_expressed	intergenic	134	6	H/ACA	Orphan	intergenic	intergenic	intergenic	intergenic									-53.8	-2.1	2
ENSG00000207503	AP001610.1	not_expressed	intergenic	121	6	H/ACA	Orphan	intergenic	intergenic	intergenic	intergenic									-33	-4.7	1
ENSG00000207516	SNORA41B	not_expressed	host_expressed	128	6	H/ACA	rRNA	non_coding	False	simple_initiation	non_functional_ncRNA	4	10874	1042	9704	9682	5	2	0.4	-35.6	-1.1	5
ENSG00000207523	SNORA66	expressed	host_expressed	133	0	H/ACA	rRNA	protein_coding	True	dual_initiation	Ribosomal protein	7	1130	81	916	889	7	1	0.142857	-45	-6.9	10
ENSG00000208308	SNORA40B	expressed	host_expressed	128	3	H/ACA	rRNA	protein_coding	False	dual_initiation	Other	17	14440	697	13615	13587	24	8	0.333333	-39.8	-0.6	3
ENSG00000208772	SNORD94	expressed	host_expressed	137	2	C/D	rRNA	protein_coding	True	dual_initiation	Ribosome biogenesis & translation	21	1537	884	516	491	23	3	0.130435	-55.2	-7.4	5
ENSG00000208797	SNORD73A	expressed	host_expressed	65	2	C/D	rRNA	protein_coding	True	dual_initiation	Ribosomal protein	4	1101	749	287	269	5	2	0.4	-7.2	-15.1	12
ENSG00000208839	SNORA35	expressed	host_not_expressed	128	0	H/ACA	Orphan	protein_coding	False	simple_initiation	Other	2	103708	16917	86663	86642	6	5	0.833333	-42	-7.3	4
ENSG00000208883	SNORD96B	expressed	host_not_expressed	79	3	C/D	rRNA	protein_coding	False	simple_initiation	Poorly characterized	4	47860	39427	8354	8315	7	4	0.571429	-19.9	-7.3	6
ENSG00000208892	SNORA49	expressed	host_expressed	136	6	H/ACA	rRNA	protein_coding	True	dual_initiation	Other	29	1798	1067	595	570	52	24	0.461538	-35.3	-4.8	6
ENSG00000209042	SNORD12C	expressed	host_expressed	89	2	C/D	rRNA	non_coding	True	simple_initiation	functional_ncRNA	1	391	225	77	52	5	5	1	-17	-12.2	5
ENSG00000209480	SNORD83B	expressed	host_expressed	93	4	C/D	rRNA	protein_coding	True	simple_initiation	Ribosomal protein	7	381	197	91	49	9	3	0.333333	-35.4	-16.8	4
ENSG00000209482	SNORD83A	expressed	host_expressed	95	4	C/D	rRNA	protein_coding	True	simple_initiation	Ribosomal protein	5	526	63	368	333	9	5	0.555556	-34.1	-14.2	11
ENSG00000209582	SNORA48	expressed	host_expressed	135	6	H/ACA	rRNA	protein_coding	True	dual_initiation	Ribosome biogenesis & translation	3	444	36	273	251	10	8	0.8	-44.8	-3.5	1
ENSG00000209645	SNORD105	expressed	host_expressed	85	2	C/D	rRNA	protein_coding	False	simple_initiation	RNA binding, processing, splicing	3	201	46	70	47	11	9	0.818182	-24.7	-10.6	8
ENSG00000209702	SNORD41	expressed	host_expressed	70	3	C/D	rRNA	protein_coding	True	dual_initiation	Other	14	206	53	83	50	25	12	0.48	-8	-10.1	6
ENSG00000210825	SNORA40	expressed	host_expressed	126	3	H/ACA	Orphan	protein_coding	True	dual_initiation	Ribosome biogenesis & translation	6	1484	906	452	421	13	8	0.615385	-39.7	-3.7	7
ENSG00000212134	AL031650.1	not_expressed	intergenic	128	3	H/ACA	Orphan	intergenic	intergenic	intergenic	intergenic									-34.1	-0.5	2
ENSG00000212135	SNORD67	expressed	host_expressed	111	3	C/D	snRNA	protein_coding	True	dual_initiation	RNA binding, processing, splicing	31	437	129	197	158	43	13	0.302326	-40.3	-7.9	6
ENSG00000212144	U8	not_expressed	intergenic	128	4	C/D	Orphan	intergenic	intergenic	intergenic	intergenic									-33.6	-6.5	7
ENSG00000212145	U8	not_expressed	host_expressed	143	5	C/D	Orphan	protein_coding	False	simple_initiation	Poorly characterized	13	2236	1473	620	586	36	24	0.666667	-43	-8.8	10
ENSG00000212149	AC055866.1	not_expressed	intergenic	128	3	H/ACA	Orphan	intergenic	intergenic	intergenic	intergenic									-40.1	-0.6	0
ENSG00000212158	SNORD66	expressed	host_expressed	76	3	C/D	rRNA	protein_coding	True	dual_initiation	Ribosome biogenesis & translation	21	215	58	81	57	33	13	0.393939	-24.8	-9.4	7
ENSG00000212161	AL590560.1	not_expressed	host_not_expressed	67	2	C/D	Orphan	non_coding	False	simple_initiation	non_functional_ncRNA	1	12446	2786	9593	9559	6	6	1	-9.6	-6.1	6
ENSG00000212163	SNORD91A	expressed	host_expressed	191	3	C/D	rRNA	protein_coding	True	simple_initiation	Ribosome biogenesis & translation	10	1043	146	706	675	14	5	0.357143	-58	-6.8	0
ENSG00000212165	U3	not_expressed	intergenic	203	3	C/D	Orphan	intergenic	intergenic	intergenic	intergenic									-60.1	-4	0
ENSG00000212168	AC073875.1	not_expressed	intergenic	65	2	C/D	rRNA	intergenic	intergenic	intergenic	intergenic									-4.4	-3.6	6
ENSG00000212175	AC015982.1	not_expressed	intergenic	148	6	H/ACA	Orphan	intergenic	intergenic	intergenic	intergenic									-38.8	-1.5	4
ENSG00000212181	AC019070.1	not_expressed	intergenic	135	9	H/ACA	Orphan	intergenic	intergenic	intergenic	intergenic									-34.5	-2.6	1
ENSG00000212182	U3	not_expressed	intergenic	216	9	C/D	Orphan	intergenic	intergenic	intergenic	intergenic									-83.4	-4.1	4
ENSG00000212187	AC092814.1	not_expressed	intergenic	122	6	H/ACA	Orphan	intergenic	intergenic	intergenic	intergenic									-27.3	-3.3	6
ENSG00000212191	AC017087.1	not_expressed	intergenic	71	6	C/D	rRNA	intergenic	intergenic	intergenic	intergenic									-9.6	-4.4	4
ENSG00000212195	U3	expressed	host_expressed	196	4	C/D	Orphan	protein_coding	False	simple_initiation	Other	2	21315	20031	1088	1047	32	31	0.96875	-53.8	-2.5	4
ENSG00000212206	AC135178.1	not_expressed	intergenic	137	0	H/ACA	Orphan	intergenic	intergenic	intergenic	intergenic									-28.1	-2.5	5
ENSG00000212211	U3	not_expressed	host_expressed	217	5	C/D	Orphan	protein_coding	False	simple_initiation	Other	3	220039	185443	34379	34338	9	7	0.777778	-63.6	-11.6	9
ENSG00000212214	SNORA48B	not_expressed	intergenic	135	6	H/ACA	rRNA	intergenic	intergenic	intergenic	intergenic									-35.7	-0.9	0
ENSG00000212224	AL133229.1	not_expressed	intergenic	122	6	H/ACA	Orphan	intergenic	intergenic	intergenic	intergenic									-21.5	-2.5	3
ENSG00000212228	AC009121.2	not_expressed	intergenic	124	6	H/ACA	Orphan	intergenic	intergenic	intergenic	intergenic									-40.8	-6.5	4
ENSG00000212229	AL591004.1	not_expressed	intergenic	73	4	C/D	rRNA	intergenic	intergenic	intergenic	intergenic									-8.1	-1.8	5
ENSG00000212232	SNORD17	expressed	host_expressed	237	2	C/D	rRNA	protein_coding	True	dual_initiation	Other	2	11341	5430	5674	5634	13	12	0.923077	-98.9	-20.4	12
ENSG00000212249	U8	not_expressed	intergenic	134	5	C/D	Orphan	intergenic	intergenic	intergenic	intergenic									-24.8	-2.7	3
ENSG00000212264	SNORD65C	not_expressed	intergenic	71	5	C/D	rRNA	intergenic	intergenic	intergenic	intergenic									-8.2	-1.2	3
ENSG00000212266	AL390877.1	not_expressed	intergenic	122	3	H/ACA	Orphan	intergenic	intergenic	intergenic	intergenic									-29.7	-0.4	8
ENSG00000212270	AL359396.1	not_expressed	host_not_expressed	65	4	C/D	rRNA	non_coding	False	simple_initiation	non_functional_ncRNA	5	170878	29139	141674	141637	9	5	0.555556	-10.7	-1.7	4
ENSG00000212273	AC090821.1	expressed	intergenic	128	3	H/ACA	Orphan	intergenic	intergenic	intergenic	intergenic									-26	-1.4	7
ENSG00000212278	SNORD81	not_expressed	intergenic	74	6	C/D	rRNA	intergenic	intergenic	intergenic	intergenic									-9.4	-3	8
ENSG00000212279	AC012435.1	not_expressed	intergenic	70	6	C/D	rRNA	intergenic	intergenic	intergenic	intergenic									-13.1	-8.3	11
ENSG00000212283	SNORD89	expressed	host_expressed	114	2	C/D	Orphan	protein_coding	True	dual_initiation	Other	7	1386	79	1193	1153	7	1	0.142857	-23.8	-17.7	11
ENSG00000212293	AL137247.1	not_expressed	host_expressed	127	6	H/ACA	Orphan	protein_coding	False	simple_initiation	Poorly characterized	1	11204	7389	3688	3657	7	7	1	-26.3	-0.5	5
ENSG00000212295	SNORD28B	not_expressed	host_not_expressed	75	4	C/D	rRNA	non_coding	False	simple_initiation	non_functional_ncRNA	3	35893	25965	9853	9823	3	1	0.333333	-13.9	-9.4	8
ENSG00000212296	SNORD72	expressed	host_expressed	80	3	C/D	rRNA	protein_coding	True	dual_initiation	Ribosomal protein	3	1611	1447	84	51	3	1	0.333333	-18.5	-6	8
ENSG00000212302	AL135998.2	not_expressed	host_not_expressed	69	4	C/D	rRNA	non_coding	False	simple_initiation	non_functional_ncRNA	3	44811	5197	39545	39510	4	2	0.5	-12.3	-6.1	0
ENSG00000212304	SNORD12	expressed	host_expressed	90	4	C/D	rRNA	non_coding	True	simple_initiation	functional_ncRNA	3	336	114	132	113	5	3	0.6	-23.9	-7.8	5
ENSG00000212309	SNORD70B	expressed	host_expressed	85	3	C/D	rRNA	protein_coding	True	dual_initiation	Ribosome biogenesis & translation	3	4352	107	4160	4131	14	12	0.857143	-21.5	-7.4	9
ENSG00000212321	U3	not_expressed	intergenic	220	8	C/D	Orphan	intergenic	intergenic	intergenic	intergenic									-57.6	-4.9	2
ENSG00000212338	AL512326.2	not_expressed	intergenic	107	3	H/ACA	Orphan	intergenic	intergenic	intergenic	intergenic									-32.2	-8.4	6
ENSG00000212342	AC103725.1	not_expressed	intergenic	156	6	H/ACA	rRNA	intergenic	intergenic	intergenic	intergenic									-40.3	-4.5	7
ENSG00000212347	AL031584.1	not_expressed	intergenic	68	5	C/D	rRNA	intergenic	intergenic	intergenic	intergenic									-14.1	-6.2	11
ENSG00000212363	AC010501.1	not_expressed	intergenic	128	9	H/ACA	Orphan	intergenic	intergenic	intergenic	intergenic									-27.4	-4.2	5
ENSG00000212371	AF111168.1	not_expressed	host_expressed	153	6	H/ACA	Orphan	protein_coding	True	dual_initiation	Other	6	2419	618	1648	1605	8	3	0.375	-39.4	-6.7	5
ENSG00000212377	AL139003.1	not_expressed	intergenic	66	4	C/D	rRNA	intergenic	intergenic	intergenic	intergenic									-8.3	-3.4	5
ENSG00000212378	AC092630.1	not_expressed	intergenic	69	4	C/D	rRNA	intergenic	intergenic	intergenic	intergenic									-8.1	-2.7	0
ENSG00000212380	SNORD115-45	expressed	host_expressed	81	7	C/D	Orphan	non_coding	False	simple_initiation	functional_ncRNA	139	14101	12178	1842	1816	147	9	0.0612245	-15.3	-8.1	0
ENSG00000212383	AC121758.1	not_expressed	host_not_expressed	134	6	H/ACA	Orphan	non_coding	False	simple_initiation	non_functional_ncRNA	1	47346	37672	9540	9516	1	1	1	-35.8	-4	4
ENSG00000212384	SNORD113-2	not_expressed	host_expressed	72	6	C/D	Orphan	non_coding	False	simple_initiation	non_functional_ncRNA	6	22254	13822	8360	8328	36	31	0.861111	-13.5	-1	3
ENSG00000212391	AC073149.1	not_expressed	intergenic	134	6	H/ACA	Orphan	intergenic	intergenic	intergenic	intergenic									-43.3	-3.8	4
ENSG00000212395	AL160271.1	not_expressed	intergenic	99	6	H/ACA	rRNA	intergenic	intergenic	intergenic	intergenic									-27.1	-2.9	3
ENSG00000212397	AP003063.1	not_expressed	intergenic	99	4	C/D	snRNA	intergenic	intergenic	intergenic	intergenic									-1.3	-2.7	4
ENSG00000212402	SNORA74B	expressed	host_expressed	201	0	H/ACA	rRNA	protein_coding	False	dual_initiation	Other	3	14035	362	13472	13449	3	1	0.333333	-86.8	-4.3	7
ENSG00000212411	SNORD115	not_expressed	intergenic	76	2	C/D	snRNA	intergenic	intergenic	intergenic	intergenic									-12.6	-20.5	12
ENSG00000212414	SNORD77B	not_expressed	intergenic	67	3	C/D	rRNA	intergenic	intergenic	intergenic	intergenic									-10.6	-3	5
ENSG00000212415	AC018515.1	not_expressed	intergenic	65	4	C/D	rRNA	intergenic	intergenic	intergenic	intergenic									-16.9	-2.8	5
ENSG00000212421	AL136367.1	expressed	intergenic	136	0	H/ACA	Orphan	intergenic	intergenic	intergenic	intergenic									-30.8	-1.4	3
ENSG00000212422	U3	not_expressed	intergenic	215	4	C/D	Orphan	intergenic	intergenic	intergenic	intergenic									-63.1	-6.2	7
ENSG00000212428	AC124303.1	not_expressed	host_expressed	59	5	C/D	Orphan	non_coding	False	simple_initiation	functional_ncRNA	61	52157	40840	11258	11231	147	87	0.591837	-13.5	-15.7	8
ENSG00000212432	SNORA75	not_expressed	intergenic	148	0	H/ACA	rRNA	intergenic	intergenic	intergenic	intergenic									-37	-6.6	5
ENSG00000212434	U3	not_expressed	host_not_expressed	200	7	C/D	Orphan	protein_coding	False	simple_initiation	Other	1	340326	76253	263873	263852	7	7	1	-53.5	-0.1	2
ENSG00000212440	SNORA75	not_expressed	intergenic	150	0	H/ACA	Orphan	intergenic	intergenic	intergenic	intergenic									-34.1	-6.6	5
ENSG00000212443	SNORA53	expressed	host_expressed	249	0	H/ACA	rRNA	protein_coding	True	dual_initiation	Other	5	1255	933	73	50	7	3	0.428571	-78.8	-2	0
ENSG00000212445	AC130462.2	not_expressed	host_expressed	135	6	H/ACA	Orphan	protein_coding	True	simple_initiation	Other	8	7405	5922	1348	1320	10	3	0.3	-38.5	-3.5	4
ENSG00000212447	SNORD90	expressed	host_expressed	111	9	C/D	Orphan	protein_coding	False	simple_initiation	RNA binding, processing, splicing	6	472	272	89	54	21	16	0.761905	-30.5	-5	7
ENSG00000212452	SNORD69	expressed	host_expressed	77	1	C/D	rRNA	protein_coding	True	dual_initiation	RNA binding, processing, splicing	9	1246	1108	61	36	14	6	0.428571	-19.3	-4.1	4
ENSG00000212455	AC079802.1	expressed	intergenic	128	6	H/ACA	Orphan	intergenic	intergenic	intergenic	intergenic									-29	-6.7	4
ENSG00000212458	AC092535.1	expressed	host_not_expressed	130	6	H/ACA	rRNA	non_coding	False	simple_initiation	non_functional_ncRNA	1	18580	5133	13317	13286	2	2	1	-39.6	-2.6	3
ENSG00000212461	AC078860.1	not_expressed	intergenic	129	6	H/ACA	snRNA	intergenic	intergenic	intergenic	intergenic									-38.5	-2.9	4
ENSG00000212464	SNORA12	expressed	host_expressed	147	6	H/ACA	Orphan	protein_coding	True	simple_initiation	RNA binding, processing, splicing	11	1056	721	188	159	13	3	0.230769	-42	-3	5
ENSG00000212479	U3	not_expressed	intergenic	215	4	C/D	Orphan	intergenic	intergenic	intergenic	intergenic									-67.3	-6.7	4
ENSG00000212490	AC104066.2	not_expressed	host_not_expressed	123	6	H/ACA	Orphan	non_coding	False	simple_initiation	non_functional_ncRNA	2	46422	35179	11120	11095	10	9	0.9	-35.2	-1.6	4
ENSG00000212493	SNORD19	expressed	host_expressed	68	4	C/D	rRNA	protein_coding	True	dual_initiation	RNA binding, processing, splicing	6	1389	43	1278	1251	14	9	0.642857	-18.1	-9.3	7
ENSG00000212498	SNORD86	not_expressed	host_expressed	86	2	C/D	rRNA	protein_coding	True	simple_initiation	Ribosome biogenesis & translation	8	370	64	220	194	13	6	0.461538	-31.2	-14.9	10
ENSG00000212511	U3	not_expressed	intergenic	220	3	C/D	Orphan	intergenic	intergenic	intergenic	intergenic									-58.9	-4.8	5
ENSG00000212517	AL121924.1	not_expressed	host_expressed	123	6	H/ACA	rRNA	protein_coding	False	simple_initiation	Other	1	6589	4962	1504	1467	6	6	1	-25.9	-10.2	9
ENSG00000212528	SNORD115-47	not_expressed	host_expressed	86	7	C/D	Orphan	non_coding	False	simple_initiation	functional_ncRNA	142	1155	14	1055	1028	147	6	0.0408163	-8.3	-5.3	6
ENSG00000212529	AC024561.1	not_expressed	host_expressed	145	6	H/ACA	Orphan	protein_coding	False	simple_initiation	Poorly characterized	1	49241	31119	17977	17937	2	2	1	-46.9	-10.2	5
ENSG00000212532	AL365219.1	not_expressed	intergenic	76	5	C/D	rRNA	intergenic	intergenic	intergenic	intergenic									-18.9	-4.2	0
ENSG00000212533	SNORA75	not_expressed	intergenic	150	6	H/ACA	Orphan	intergenic	intergenic	intergenic	intergenic									-35.3	-6.7	5
ENSG00000212534	SNORD70	expressed	host_expressed	88	3	C/D	rRNA	protein_coding	True	dual_initiation	Ribosome biogenesis & translation	2	2764	1243	1433	1410	14	13	0.928571	-20.7	-7.9	8
ENSG00000212538	U3	expressed	intergenic	204	4	C/D	Orphan	intergenic	intergenic	intergenic	intergenic									-55.9	-3.9	5
ENSG00000212539	U3	not_expressed	host_expressed	200	5	C/D	Orphan	protein_coding	False	simple_initiation	Poorly characterized	25	23040	17878	4962	4933	27	3	0.111111	-68.8	0	0
ENSG00000212551	U3	not_expressed	host_not_expressed	210	6	C/D	Orphan	protein_coding	False	simple_initiation	Poorly characterized	1	280508	265126	15172	15142	5	5	1	-59.2	-0.9	4
ENSG00000212553	SNORD116	not_expressed	intergenic	93	4	C/D	rRNA	intergenic	intergenic	intergenic	intergenic									-20	-3.6	0
ENSG00000212558	AC104794.1	not_expressed	intergenic	115	6	H/ACA	Orphan	intergenic	intergenic	intergenic	intergenic									-25.2	-6	4
ENSG00000212565	AC068531.1	not_expressed	intergenic	128	9	H/ACA	Orphan	intergenic	intergenic	intergenic	intergenic									-36.7	-5.7	6
ENSG00000212567	AC008810.1	not_expressed	host_expressed	128	9	H/ACA	Orphan	protein_coding	True	dual_initiation	Other	1	20480	7860	12492	12455	9	9	1	-38.6	-9.4	10
ENSG00000212579	AL033519.1	not_expressed	host_not_expressed	128	9	H/ACA	Orphan	non_coding	False	simple_initiation	non_functional_ncRNA	0	0	0	0	0	1	0	0	-30.4	-4.7	5
ENSG00000212580	AC078994.1	not_expressed	intergenic	119	9	H/ACA	Orphan	intergenic	intergenic	intergenic	intergenic									-19.8	-10.1	12
ENSG00000212581	U8	not_expressed	intergenic	133	4	C/D	Orphan	intergenic	intergenic	intergenic	intergenic									-36.5	-4.5	4
ENSG00000212586	AL035555.1	not_expressed	intergenic	98	6	H/ACA	rRNA	intergenic	intergenic	intergenic	intergenic									-22.2	-3.1	7
ENSG00000212587	SNORA40C	not_expressed	intergenic	128	9	H/ACA	rRNA	intergenic	intergenic	intergenic	intergenic									-31.8	-0.4	3
ENSG00000212588	SNORA26	expressed	host_expressed	122	6	H/ACA	Orphan	non_coding	False	simple_initiation	functional_ncRNA	2	538	291	125	101	5	4	0.8	-33.1	-4.4	0
ENSG00000212589	AL592546.1	not_expressed	intergenic	132	9	H/ACA	Orphan	intergenic	intergenic	intergenic	intergenic									-42	-3.8	4
ENSG00000212590	AC003109.1	not_expressed	intergenic	122	6	H/ACA	Orphan	intergenic	intergenic	intergenic	intergenic									-29.1	-7.4	8
ENSG00000212593	AC008915.1	not_expressed	intergenic	81	6	H/ACA	Orphan	intergenic	intergenic	intergenic	intergenic									-16.2	-7.1	6
ENSG00000212594	U8	not_expressed	host_expressed	132	4	C/D	Orphan	protein_coding	False	simple_initiation	Other	2	3368	1083	2153	2130	68	67	0.985294	-29.9	-7.6	8
ENSG00000212598	U3	not_expressed	intergenic	212	4	C/D	Orphan	intergenic	intergenic	intergenic	intergenic									-59.5	-2.1	5
ENSG00000212604	AC044913.1	not_expressed	intergenic	135	6	H/ACA	rRNA	intergenic	intergenic	intergenic	intergenic									-48.4	-1.6	2
ENSG00000212607	SNORA3B	expressed	host_expressed	131	0	H/ACA	rRNA	protein_coding	True	simple_initiation	Ribosomal protein	4	789	548	110	87	4	1	0.25	-52.2	-7.4	0
ENSG00000212608	AC112218.1	not_expressed	intergenic	124	0	H/ACA	Orphan	intergenic	intergenic	intergenic	intergenic									-19.5	-1.5	4
ENSG00000212610	U3	not_expressed	intergenic	210	4	C/D	Orphan	intergenic	intergenic	intergenic	intergenic									-61.6	-3.6	6
ENSG00000212611	AC236668.2	not_expressed	intergenic	70	3	C/D	rRNA	intergenic	intergenic	intergenic	intergenic									-9.3	-1.5	5
ENSG00000212615	SNORD58	expressed	host_expressed	66	3	C/D	Orphan	protein_coding	True	dual_initiation	RNA binding, processing, splicing	1	10975	3995	6914	6885	14	14	1	-3.3	-2.8	6
ENSG00000212618	AC090286.2	not_expressed	intergenic	75	11	C/D	Orphan	intergenic	intergenic	intergenic	intergenic									-8	-3	8
ENSG00000212620	SNORA75	not_expressed	host_expressed	127	9	H/ACA	rRNA	non_coding	False	simple_initiation	non_functional_ncRNA	1	33690	15500	18063	18039	2	2	1	-32.1	-1.7	0
ENSG00000212624	AL050343.1	not_expressed	intergenic	122	6	H/ACA	Orphan	intergenic	intergenic	intergenic	intergenic									-31.4	-1.8	3
ENSG00000212626	AP005270.1	expressed	intergenic	134	6	H/ACA	Orphan	intergenic	intergenic	intergenic	intergenic									-36.9	-3.6	2
ENSG00000220988	SNORD88C	expressed	host_expressed	91	3	C/D	rRNA	non_coding	True	simple_initiation	non_functional_ncRNA	1	200	37	72	32	4	4	1	-40.1	-18.8	12
ENSG00000221040	AL355538.1	expressed	intergenic	216	5	C/D	Orphan	intergenic	intergenic	intergenic	intergenic									-68.1	-8.1	9
ENSG00000221043	U3	not_expressed	intergenic	212	9	C/D	Orphan	intergenic	intergenic	intergenic	intergenic									-59.9	-5.8	5
ENSG00000221044	U3	not_expressed	intergenic	204	8	C/D	Orphan	intergenic	intergenic	intergenic	intergenic									-64.4	-5	4
ENSG00000221060	AL157789.1	not_expressed	intergenic	129	9	H/ACA	Orphan	intergenic	intergenic	intergenic	intergenic									-35.6	-5.7	5
ENSG00000221066	SNORD111	expressed	host_expressed	94	5	C/D	rRNA	protein_coding	False	dual_initiation	RNA binding, processing, splicing	6	2906	2586	226	204	25	20	0.8	-19.9	-13.1	11
ENSG00000221083	AL096855.1	not_expressed	host_expressed	125	6	H/ACA	Orphan	protein_coding	False	simple_initiation	Other	8	32542	29296	3121	3086	23	16	0.695652	-42.9	-0.5	4
ENSG00000221093	AC107376.1	not_expressed	intergenic	111	6	H/ACA	Orphan	intergenic	intergenic	intergenic	intergenic									-36.4	-8	7
ENSG00000221102	SNORA11B	expressed	host_expressed	129	0	H/ACA	Orphan	protein_coding	False	simple_initiation	Poorly characterized	1	30696	11898	18669	18642	16	16	1	-46.3	-2	4
ENSG00000221116	SNORD110	expressed	host_expressed	75	3	C/D	rRNA	protein_coding	True	simple_initiation	Ribosome biogenesis & translation	3	1024	820	129	102	13	11	0.846154	-12	-13.5	8
ENSG00000221125	AC011452.1	expressed	host_expressed	212	5	C/D	Orphan	protein_coding	False	simple_initiation	Other	0	0	0	0	0	10	0	0	-65.5	-5.1	0
ENSG00000221139	AC011774.1	not_expressed	host_expressed	104	5	C/D	Orphan	non_coding	False	simple_initiation	non_functional_ncRNA	1	48987	128	48755	48718	3	3	1	-40	-5.6	9
ENSG00000221148	AC090679.1	not_expressed	intergenic	125	6	H/ACA	Orphan	intergenic	intergenic	intergenic	intergenic									-34.4	-3.2	4
ENSG00000221164	SNORA11F	expressed	intergenic	128	6	H/ACA	Orphan	intergenic	intergenic	intergenic	intergenic									-48.9	-2.8	5
ENSG00000221241	SNORD88A	expressed	host_expressed	91	4	C/D	rRNA	non_coding	True	simple_initiation	non_functional_ncRNA	3	1829	1652	86	59	4	2	0.5	-42.1	-21	12
ENSG00000221245	AC080089.1	not_expressed	intergenic	127	6	H/ACA	Orphan	intergenic	intergenic	intergenic	intergenic									-38.9	-0.6	4
ENSG00000221300	AC025750.2	not_expressed	intergenic	60	6	C/D	rRNA	intergenic	intergenic	intergenic	intergenic									-10.6	-0.7	3
ENSG00000221303	SNORA79	expressed	host_expressed	140	0	H/ACA	Orphan	protein_coding	True	dual_initiation	Other	4	2245	1067	1038	1014	9	6	0.666667	-44.2	-2.4	0
ENSG00000221332	U3	not_expressed	host_expressed	208	3	C/D	Orphan	protein_coding	False	simple_initiation	Other	2	51783	15631	35944	35906	6	5	0.833333	-57	0	0
ENSG00000221345	U3	not_expressed	intergenic	213	6	C/D	Orphan	intergenic	intergenic	intergenic	intergenic									-59	-3.5	5
ENSG00000221381	SNORD88B	not_expressed	host_expressed	91	3	C/D	rRNA	non_coding	True	simple_initiation	non_functional_ncRNA	4	339	173	75	46	4	1	0.25	-38.3	-11.7	2
ENSG00000221398	AP000324.1	not_expressed	host_expressed	128	6	H/ACA	Orphan	protein_coding	False	simple_initiation	Other	3	8973	2418	6427	6391	3	1	0.333333	-50.2	-10.3	6
ENSG00000221400	SNORD3J	not_expressed	intergenic	190	4	C/D	snRNA	intergenic	intergenic	intergenic	intergenic									-62.9	-5.1	7
ENSG00000221420	SNORA81	expressed	host_expressed	178	3	H/ACA	rRNA	protein_coding	True	dual_initiation	Ribosome biogenesis & translation	7	485	31	276	253	11	5	0.454545	-59	-1.1	4
ENSG00000221455	U3	not_expressed	intergenic	213	5	C/D	Orphan	intergenic	intergenic	intergenic	intergenic									-59.9	-2	4
ENSG00000221459	SNORA11C	expressed	host_not_expressed	129	0	H/ACA	Orphan	protein_coding	False	simple_initiation	Other	1	39539	17910	21500	21477	3	3	1	-46.9	-3.8	3
ENSG00000221461	U3	not_expressed	intergenic	216	5	C/D	Orphan	intergenic	intergenic	intergenic	intergenic									-77	-4.4	5
ENSG00000221475	SNORA11D	expressed	host_expressed	128	6	H/ACA	Orphan	protein_coding	False	simple_initiation	Poorly characterized	11	605	230	247	221	13	3	0.230769	-50.3	-12.2	9
ENSG00000221491	SNORA2C	expressed	host_expressed	137	6	H/ACA	snRNA	protein_coding	True	simple_initiation	Other	9	769	424	208	174	9	1	0.111111	-49.7	-8	3
ENSG00000221496	U3	not_expressed	intergenic	239	6	C/D	snRNA	intergenic	intergenic	intergenic	intergenic									-65.2	-3.2	4
ENSG00000221498	AC064871.1	not_expressed	intergenic	112	6	H/ACA	Orphan	intergenic	intergenic	intergenic	intergenic									-38.7	-6.5	10
ENSG00000221500	SNORD100	expressed	host_expressed	76	1	C/D	rRNA	protein_coding	True	dual_initiation	Ribosomal protein	4	400	240	84	52	5	2	0.4	-19.6	-10.4	2
ENSG00000221514	SNORD111B	expressed	host_expressed	80	2	C/D	rRNA	protein_coding	False	dual_initiation	RNA binding, processing, splicing	3	1549	311	1158	1134	25	23	0.92	-18.9	-10.3	7
ENSG00000221539	SNORD99	expressed	host_expressed	74	4	C/D	rRNA	non_coding	True	simple_initiation	functional_ncRNA	5	856	712	70	35	5	1	0.2	-19.6	-6.8	10
ENSG00000221611	AC007688.1	not_expressed	host_expressed	91	4	C/D	rRNA	non_coding	False	simple_initiation	non_functional_ncRNA	2	12537	5157	7289	7263	3	2	0.666667	-23.1	-1	5
ENSG00000221633	U3	not_expressed	host_expressed	208	6	C/D	Orphan	protein_coding	False	simple_initiation	Poorly characterized	17	20663	8636	11819	11779	27	11	0.407407	-68.2	-5.1	7
ENSG00000221638	U3	not_expressed	intergenic	219	6	C/D	Orphan	intergenic	intergenic	intergenic	intergenic									-73.3	-7.3	8
ENSG00000221639	AC053527.1	not_expressed	host_not_expressed	125	6	H/ACA	Orphan	non_coding	False	simple_initiation	non_functional_ncRNA	1	10419	4553	5741	5720	4	4	1	-40.7	-4.8	4
ENSG00000221643	SNORA77	expressed	host_expressed	125	0	H/ACA	Orphan	protein_coding	False	simple_initiation	Other	20	5655	2011	3519	3500	21	2	0.0952381	-53.1	-5.8	4
ENSG00000221673	U3	not_expressed	intergenic	214	8	C/D	Orphan	intergenic	intergenic	intergenic	intergenic									-60.5	-7.6	7
ENSG00000221705	SNORA11E	expressed	host_not_expressed	128	6	H/ACA	Orphan	protein_coding	False	simple_initiation	Poorly characterized	11	605	230	247	211	13	3	0.230769	-50.3	-10.7	4
ENSG00000221711	AC104701.1	not_expressed	intergenic	58	10	C/D	rRNA	intergenic	intergenic	intergenic	intergenic									-8.7	-2.7	6
ENSG00000221716	SNORA11	expressed	host_expressed	128	0	H/ACA	Orphan	protein_coding	False	simple_initiation	Poorly characterized	12	1114	821	165	140	14	3	0.214286	-49.6	-12.3	6
ENSG00000221719	SNORA3C	not_expressed	intergenic	125	6	H/ACA	rRNA	intergenic	intergenic	intergenic	intergenic									-41.2	-6	4
ENSG00000221740	SNORD93	expressed	host_expressed	74	2	C/D	rRNA	non_coding	False	dual_initiation	non_functional_ncRNA	2	420	58	288	261	5	4	0.8	-20.8	-9.6	5
ENSG00000221750	SNORA11G	expressed	host_expressed	129	0	H/ACA	Orphan	protein_coding	False	dual_initiation	Other	10	565	201	235	208	13	4	0.307692	-51	-11.6	7
ENSG00000221803	SNORD23	expressed	host_expressed	110	4	C/D	Orphan	protein_coding	False	dual_initiation	Ribosome biogenesis & translation	10	709	32	567	544	12	3	0.25	-61.4	-24.3	10
ENSG00000222095	AL132709.5	not_expressed	host_expressed	74	2	C/D	Orphan	non_coding	False	simple_initiation	non_functional_ncRNA	18	2982	351	2557	2525	28	11	0.392857	-17.9	-5.4	3
ENSG00000222145	SNORA73	not_expressed	host_expressed	189	6	H/ACA	Orphan	protein_coding	False	simple_initiation	RNA binding, processing, splicing	13	91358	55345	35824	35789	15	3	0.2	-51	-3.8	5
ENSG00000222185	AL132709.6	expressed	host_expressed	75	2	C/D	Orphan	non_coding	False	simple_initiation	non_functional_ncRNA	21	7914	357	7482	7457	28	8	0.285714	-16	-4.6	5
ENSG00000222345	SNORD19C	expressed	host_expressed	76	3	C/D	rRNA	protein_coding	True	dual_initiation	RNA binding, processing, splicing	8	474	308	90	63	14	7	0.5	-11.2	-7	9
ENSG00000222365	SNORD12B	expressed	host_expressed	91	2	C/D	rRNA	non_coding	True	simple_initiation	functional_ncRNA	2	1280	1112	77	54	5	4	0.8	-30.5	-10.9	5
ENSG00000222370	SNORA36B	expressed	host_expressed	131	6	H/ACA	rRNA	protein_coding	False	dual_initiation	Other	9	5881	1601	4149	4111	34	26	0.764706	-45.8	-1.5	2
ENSG00000222489	SNORA79B	expressed	host_expressed	148	0	H/ACA	snRNA	protein_coding	True	dual_initiation	Other	4	7568	2214	5206	5177	7	4	0.571429	-49.7	-2.1	0
ENSG00000222588	AL355598.1	not_expressed	host_expressed	129	6	H/ACA	Orphan	protein_coding	False	dual_initiation	Ribosome biogenesis & translation	8	383	114	140	107	22	15	0.681818	-43.5	-4.2	8
ENSG00000222604	AC007956.1	not_expressed	intergenic	110	9	H/ACA	Orphan	intergenic	intergenic	intergenic	intergenic									-29.5	0	0
ENSG00000222666	U3	not_expressed	intergenic	213	6	C/D	Orphan	intergenic	intergenic	intergenic	intergenic									-88.9	-6	3
ENSG00000222937	SNORD63B	expressed	host_expressed	70	4	C/D	rRNA	protein_coding	True	dual_initiation	RNA binding, processing, splicing	11	1210	826	314	274	16	6	0.375	-14.9	-4.5	7
ENSG00000222966	AC004522.1	expressed	intergenic	126	9	H/ACA	Orphan	intergenic	intergenic	intergenic	intergenic									-25.5	-3.1	3
ENSG00000223004	SNORD29	not_expressed	intergenic	68	2	C/D	rRNA	intergenic	intergenic	intergenic	intergenic									-8.5	-0.5	4
ENSG00000223027	AL139404.1	not_expressed	intergenic	141	6	H/ACA	rRNA	intergenic	intergenic	intergenic	intergenic									-38.1	-4.7	4
ENSG00000223224	SNORD71	expressed	host_expressed	86	3	C/D	rRNA	protein_coding	True	simple_initiation	Other	14	2652	322	2244	2210	25	12	0.48	-27.7	-17.2	9
ENSG00000223294	SNORD83	not_expressed	host_expressed	77	4	C/D	rRNA	protein_coding	False	simple_initiation	Poorly characterized	2	143085	33961	109047	109018	5	4	0.8	-14.5	-4.2	3
ENSG00000225091	SNORA71A	expressed	host_expressed	134	6	H/ACA	rRNA	non_coding	False	dual_initiation	functional_ncRNA	3	4541	3600	807	771	8	6	0.75	-44.4	-2.7	0
ENSG00000226572	SNORD57	expressed	host_expressed	72	3	C/D	rRNA	protein_coding	True	simple_initiation	Ribosome biogenesis & translation	10	189	45	72	43	13	4	0.307692	-8.9	-10	7
ENSG00000229686	SNORD56	expressed	host_expressed	71	6	C/D	rRNA	protein_coding	True	simple_initiation	Ribosome biogenesis & translation	9	228	76	81	53	13	5	0.384615	-16.2	-12.9	10
ENSG00000231587	SNORD62B	expressed	host_expressed	86	2	C/D	rRNA	protein_coding	False	simple_initiation	RNA binding, processing, splicing	27	3332	2391	855	834	30	4	0.133333	-24.2	-17.5	6
ENSG00000235284	SNORD62A	expressed	host_expressed	86	2	C/D	rRNA	protein_coding	False	simple_initiation	RNA binding, processing, splicing	24	948	526	336	299	30	7	0.233333	-24.2	-19.6	13
ENSG00000235408	SNORA71B	expressed	host_expressed	272	9	H/ACA	rRNA	non_coding	False	dual_initiation	functional_ncRNA	5	3697	582	2843	2805	8	4	0.5	-93.3	-5.3	5
ENSG00000238295	AC019080.2	not_expressed	host_expressed	104	4	C/D	Orphan	protein_coding	True	simple_initiation	Other	1	53877	46613	7160	7132	7	7	1	-22.6	-1	3
ENSG00000238297	U3	not_expressed	host_expressed	192	6	C/D	Orphan	protein_coding	False	dual_initiation	Other	3	3069	1577	1300	1260	33	31	0.939394	-57.9	-4.8	5
ENSG00000238300	SNORD121B	expressed	host_expressed	81	3	C/D	rRNA	protein_coding	False	simple_initiation	RNA binding, processing, splicing	17	2214	1464	669	629	28	12	0.428571	-19.7	-13.8	8
ENSG00000238311	SNORD13E	expressed	host_expressed	104	5	C/D	Orphan	protein_coding	True	simple_initiation	Other	21	773	332	337	299	32	12	0.375	-22	-0.9	3
ENSG00000238316	AL627082.2	not_expressed	intergenic	104	5	C/D	Orphan	intergenic	intergenic	intergenic	intergenic									-25.9	-3.2	4
ENSG00000238317	SNORD11	expressed	host_expressed	84	1	C/D	rRNA	protein_coding	True	dual_initiation	Ribosome biogenesis & translation	9	2774	149	2541	2514	14	6	0.428571	-12.9	-14.8	11
ENSG00000238326	AC016596.1	not_expressed	intergenic	104	5	C/D	Orphan	intergenic	intergenic	intergenic	intergenic									-19.7	-5.5	7
ENSG00000238344	SNORD126	expressed	host_expressed	77	2	C/D	Orphan	protein_coding	True	dual_initiation	Other	3	1066	191	798	757	7	5	0.714286	-17.1	-7	14
ENSG00000238363	SNORA13	expressed	host_expressed	133	0	H/ACA	rRNA	non_coding	True	simple_initiation	non_functional_ncRNA	1	394	191	70	46	2	2	1	-44.3	-7.6	5
ENSG00000238371	AC010145.2	not_expressed	intergenic	104	6	C/D	rRNA	intergenic	intergenic	intergenic	intergenic									-20.1	-4.7	3
ENSG00000238372	AP001329.1	not_expressed	host_expressed	105	4	C/D	Orphan	protein_coding	False	simple_initiation	Poorly characterized	4	167496	39782	127609	127578	6	3	0.5	-24.3	-6.4	5
ENSG00000238387	AC122179.1	not_expressed	host_expressed	104	6	C/D	Orphan	protein_coding	False	simple_initiation	Other	5	4272	766	3402	3382	10	6	0.6	-21.8	-4.3	7
ENSG00000238390	AP000254.1	not_expressed	host_expressed	177	9	H/ACA	rRNA	protein_coding	False	dual_initiation	Other	2	2566	421	1968	1940	4	3	0.75	-60.2	-3.2	5
ENSG00000238410	AC007099.3	not_expressed	intergenic	135	9	H/ACA	Orphan	intergenic	intergenic	intergenic	intergenic									-28.6	-2.7	4
ENSG00000238423	SNORD42B	expressed	host_expressed	67	2	C/D	rRNA	protein_coding	False	simple_initiation	Ribosomal protein	2	280	121	92	56	5	4	0.8	-12.8	-18.9	11
ENSG00000238440	AC135279.1	not_expressed	host_not_expressed	104	5	C/D	snRNA	protein_coding	False	simple_initiation	Poorly characterized	1	37261	34450	2707	2672	12	12	1	-23.9	-5.1	7
ENSG00000238485	AL161777.1	not_expressed	host_expressed	104	6	C/D	Orphan	protein_coding	False	simple_initiation	Other	1	56321	5717	50500	50464	28	28	1	-18.7	-4.5	4
ENSG00000238498	SNORD13P1	not_expressed	intergenic	104	5	C/D	rRNA	intergenic	intergenic	intergenic	intergenic									-26.1	-4.9	6
ENSG00000238503	SNORD18	not_expressed	intergenic	70	3	C/D	rRNA	intergenic	intergenic	intergenic	intergenic									-17	-2.6	0
ENSG00000238519	U8	not_expressed	host_not_expressed	133	4	C/D	Orphan	protein_coding	False	simple_initiation	Poorly characterized	2	3484	1773	1578	1542	10	9	0.9	-40.2	-3.4	0
ENSG00000238531	SNORD105B	expressed	host_expressed	79	3	C/D	rRNA	protein_coding	False	simple_initiation	RNA binding, processing, splicing	6	209	51	79	45	11	6	0.545455	-21.5	-11.7	5
ENSG00000238570	AC092654.1	not_expressed	host_expressed	103	4	C/D	Orphan	protein_coding	False	simple_initiation	Other	1	196202	133829	62270	62243	4	4	1	-28.1	-3.8	4
ENSG00000238575	AP005136.1	not_expressed	intergenic	135	9	H/ACA	Orphan	intergenic	intergenic	intergenic	intergenic									-40.4	-2.7	0
ENSG00000238578	SNORD4A	expressed	host_expressed	72	2	C/D	rRNA	protein_coding	False	simple_initiation	Ribosomal protein	3	1836	1693	71	50	5	3	0.6	-18.4	-11.5	4
ENSG00000238594	AL355497.3	not_expressed	host_expressed	103	10	C/D	Orphan	protein_coding	False	simple_initiation	Other	1	71249	21087	50059	50037	3	3	1	-26.5	-3.7	7
ENSG00000238597	SNORD4B	expressed	host_expressed	72	3	C/D	rRNA	protein_coding	False	simple_initiation	Ribosomal protein	5	230	43	115	91	5	1	0.2	-15.7	-10.9	4
ENSG00000238622	SNORD97	expressed	host_expressed	142	6	C/D	rRNA	protein_coding	True	dual_initiation	Ribosome biogenesis & translation	14	577	54	381	348	21	8	0.380952	-30.14	-6.6	5
ENSG00000238628	AL133211.1	not_expressed	intergenic	104	4	C/D	Orphan	intergenic	intergenic	intergenic	intergenic									-27.7	-5.2	7
ENSG00000238645	AC079416.1	not_expressed	intergenic	103	5	C/D	Orphan	intergenic	intergenic	intergenic	intergenic									-22.1	-1.2	3
ENSG00000238649	SNORD42A	expressed	host_expressed	64	4	C/D	rRNA	protein_coding	False	simple_initiation	Ribosomal protein	4	675	531	80	59	5	2	0.4	-7.9	-17.8	12
ENSG00000238650	SNORD54	expressed	host_expressed	67	3	C/D	rRNA	protein_coding	False	dual_initiation	Ribosomal protein	2	295	160	68	28	5	4	0.8	-11.4	-9.5	6
ENSG00000238685	AC092365.1	not_expressed	intergenic	127	6	H/ACA	Orphan	intergenic	intergenic	intergenic	intergenic									-47.7	-11	9
ENSG00000238694	AC020589.1	not_expressed	intergenic	104	5	C/D	Orphan	intergenic	intergenic	intergenic	intergenic									-25	-3.2	5
ENSG00000238707	AC025039.1	not_expressed	intergenic	69	4	C/D	rRNA	intergenic	intergenic	intergenic	intergenic									-12.6	-4	4
ENSG00000238724	AC020549.1	not_expressed	intergenic	104	6	C/D	Orphan	intergenic	intergenic	intergenic	intergenic									-21.9	-5	6
ENSG00000238745	AC113340.2	not_expressed	host_expressed	104	5	C/D	Orphan	protein_coding	True	simple_initiation	Other	1	41978	12391	29483	29458	5	5	1	-30	-1.9	3
ENSG00000238754	SCARNA18B	expressed	host_expressed	135	0	H/ACA	Orphan	protein_coding	True	dual_initiation	Other	1	7371	1771	5465	5426	11	11	1	-39.5	-0.2	4
ENSG00000238761	AL591521.1	not_expressed	intergenic	104	6	C/D	Orphan	intergenic	intergenic	intergenic	intergenic									-21.5	-2.5	3
ENSG00000238764	AL845433.1	not_expressed	intergenic	104	6	C/D	Orphan	intergenic	intergenic	intergenic	intergenic									-27	-3.2	5
ENSG00000238793	SNORD124	expressed	host_expressed	104	4	C/D	Orphan	protein_coding	True	dual_initiation	Other	15	447	265	78	37	25	11	0.44	-35.8	-11.8	10
ENSG00000238795	SCARNA12	expressed	host_expressed	270	6	H/ACA	rRNA	protein_coding	True	dual_initiation	Other	6	431	71	90	63	9	4	0.444444	-102.3	-18.3	13
ENSG00000238804	AC091133.2	not_expressed	intergenic	104	6	C/D	Orphan	intergenic	intergenic	intergenic	intergenic									-21.4	-4.3	3
ENSG00000238819	AC091074.1	not_expressed	intergenic	85	3	C/D	rRNA	intergenic	intergenic	intergenic	intergenic									-11.3	-3.8	7
ENSG00000238832	AC004839.1	not_expressed	host_not_expressed	145	6	H/ACA	Orphan	protein_coding	True	simple_initiation	Poorly characterized	6	12830	2859	9826	9794	8	3	0.375	-26	-0.2	2
ENSG00000238835	SCARNA18	expressed	host_expressed	134	0	H/ACA	Orphan	protein_coding	False	dual_initiation	Other	3	3100	672	2294	2260	4	2	0.5	-38.4	-3.3	4
ENSG00000238840	U8	not_expressed	intergenic	133	5	C/D	Orphan	intergenic	intergenic	intergenic	intergenic									-28.5	-2.2	5
ENSG00000238854	AC100803.1	not_expressed	intergenic	75	3	C/D	rRNA	intergenic	intergenic	intergenic	intergenic									-12.4	-5.4	5
ENSG00000238862	SNORD19B	expressed	host_expressed	84	3	C/D	rRNA	protein_coding	True	dual_initiation	RNA binding, processing, splicing	7	244	41	119	97	14	8	0.571429	-18.9	-12.6	10
ENSG00000238886	SNORD121A	expressed	host_expressed	82	3	C/D	rRNA	protein_coding	False	simple_initiation	RNA binding, processing, splicing	12	4701	436	4183	4151	28	17	0.607143	-21.2	-11	9
ENSG00000238901	AC100872.1	not_expressed	intergenic	104	6	C/D	Orphan	intergenic	intergenic	intergenic	intergenic									-26.5	-6	2
ENSG00000238902	AC026671.1	not_expressed	host_expressed	104	10	C/D	rRNA	protein_coding	False	simple_initiation	Other	2	366646	193070	173472	173431	5	4	0.8	-23.9	-1.4	2
ENSG00000238906	AC004912.1	not_expressed	host_expressed	105	5	C/D	rRNA	protein_coding	False	simple_initiation	Poorly characterized	8	10134	8167	1862	1840	8	1	0.125	-21.9	-2.5	3
ENSG00000238917	SNORD10	expressed	host_expressed	142	4	C/D	rRNA	protein_coding	True	dual_initiation	Ribosome biogenesis & translation	5	367	120	105	79	10	6	0.6	-57.3	-17.7	15
ENSG00000238934	AL591806.2	not_expressed	intergenic	129	6	H/ACA	Orphan	intergenic	intergenic	intergenic	intergenic									-59.7	-9.1	3
ENSG00000238936	SNORD65B	expressed	intergenic	73	4	C/D	Orphan	intergenic	intergenic	intergenic	intergenic									-16.6	-5.7	8
ENSG00000238942	SNORD2	expressed	host_expressed	69	2	C/D	rRNA	protein_coding	True	dual_initiation	Ribosome biogenesis & translation	3	269	101	99	76	11	9	0.818182	-15.9	-4.4	6
ENSG00000238961	SNORA47	expressed	host_expressed	138	6	H/ACA	rRNA	protein_coding	True	simple_initiation	Other	1	8386	6541	1707	1678	2	2	1	-54.2	-7.8	8
ENSG00000238963	AL121952.2	not_expressed	intergenic	131	7	C/D	Orphan	intergenic	intergenic	intergenic	intergenic									-20.2	-3.8	3
ENSG00000238966	AC090571.1	not_expressed	host_expressed	72	5	C/D	Orphan	protein_coding	True	dual_initiation	Other	3	60818	4804	55942	55904	17	15	0.882353	-15.8	-4.2	0
ENSG00000239002	SCARNA10	expressed	host_expressed	330	1	C/D	rRNA	protein_coding	True	dual_initiation	Other	4	499	90	79	55	31	28	0.903226	-125.6	-15.1	14
ENSG00000239005	AC097376.1	not_expressed	host_expressed	127	6	H/ACA	Orphan	non_coding	False	simple_initiation	non_functional_ncRNA	1	33765	17192	16446	16408	3	3	1	-54.4	-9	4
ENSG00000239008	AL590031.1	not_expressed	intergenic	127	9	H/ACA	Orphan	intergenic	intergenic	intergenic	intergenic									-47.1	-15.4	9
ENSG00000239014	SNORD108	expressed	host_expressed	71	4	C/D	Orphan	non_coding	False	simple_initiation	functional_ncRNA	15	15932	4489	11372	11349	147	133	0.904762	-14.9	-15.7	9
ENSG00000239035	SNORD13D	not_expressed	intergenic	104	4	C/D	Orphan	intergenic	intergenic	intergenic	intergenic									-19	-9.5	4
ENSG00000239039	SNORD13	expressed	intergenic	104	5	C/D	rRNA	intergenic	intergenic	intergenic	intergenic									-27.2	-8.6	7
ENSG00000239041	AC018712.2	not_expressed	intergenic	104	6	C/D	Orphan	intergenic	intergenic	intergenic	intergenic									-27.5	-3.5	3
ENSG00000239043	SNORD127	expressed	host_expressed	86	2	C/D	rRNA	protein_coding	True	dual_initiation	RNA binding, processing, splicing	12	1504	67	1351	1329	15	4	0.266667	-21.3	-8	5
ENSG00000239079	AP002762.1	expressed	intergenic	104	6	C/D	Orphan	intergenic	intergenic	intergenic	intergenic									-21.5	-2.6	4
ENSG00000239080	AL807743.1	not_expressed	intergenic	104	5	C/D	Orphan	intergenic	intergenic	intergenic	intergenic									-24.8	-4.2	7
ENSG00000239093	AC068299.1	not_expressed	intergenic	105	3	C/D	Orphan	intergenic	intergenic	intergenic	intergenic									-22.6	-6.6	6
ENSG00000239096	AC090425.1	not_expressed	intergenic	104	5	C/D	Orphan	intergenic	intergenic	intergenic	intergenic									-39.7	-0.1	2
ENSG00000239112	SNORD123	expressed	host_not_expressed	70	3	C/D	Orphan	non_coding	False	simple_initiation	functional_ncRNA	1	2463	2307	86	52	2	2	1	-13.6	-8.9	3
ENSG00000239127	SNORD125	not_expressed	host_expressed	96	7	C/D	rRNA	protein_coding	True	simple_initiation	Other	17	2352	1008	1248	1213	22	6	0.272727	-31.3	-20.8	10
ENSG00000239128	SNORD13P3	expressed	host_expressed	104	5	C/D	Orphan	protein_coding	True	simple_initiation	Other	11	9400	6858	2438	2398	21	11	0.52381	-25.9	-4.8	5
ENSG00000239129	AC104982.1	not_expressed	intergenic	104	5	C/D	Orphan	intergenic	intergenic	intergenic	intergenic									-22.1	-2.1	4
ENSG00000239137	AC010327.1	not_expressed	host_not_expressed	104	10	C/D	Orphan	non_coding	False	simple_initiation	non_functional_ncRNA	4	14286	4371	9811	9780	4	1	0.25	-23.8	-0.2	2
ENSG00000239142	U8	expressed	intergenic	136	4	C/D	Orphan	intergenic	intergenic	intergenic	intergenic									-29	-2	3
ENSG00000239148	U8	not_expressed	intergenic	133	5	C/D	Orphan	intergenic	intergenic	intergenic	intergenic									-30.6	-1.5	4
ENSG00000239149	SNORA59A	expressed	host_expressed	152	0	H/ACA	Orphan	protein_coding	False	simple_initiation	Other	69	1803	154	1497	1474	69	1	0.0144928	-52.8	-6	0
ENSG00000239153	AP000997.1	not_expressed	intergenic	104	6	C/D	Orphan	intergenic	intergenic	intergenic	intergenic									-23.8	-3.6	0
ENSG00000239169	SNORD109B	expressed	host_expressed	67	1	C/D	rRNA	non_coding	False	simple_initiation	functional_ncRNA	145	1441	935	439	395	147	3	0.0204082	-16.3	-21.9	15
ENSG00000239182	AL391280.1	not_expressed	host_expressed	128	9	H/ACA	Orphan	protein_coding	False	dual_initiation	Other	1	12794	10694	1972	1949	11	11	1	-49.3	-6.9	7
ENSG00000239183	SNORA84	expressed	host_expressed	133	0	H/ACA	rRNA	protein_coding	False	dual_initiation	RNA binding, processing, splicing	1	4188	1019	3036	3002	34	34	1	-50.4	-2.4	4
ENSG00000239195	SNORD5	expressed	host_expressed	73	1	C/D	rRNA	protein_coding	True	dual_initiation	Ribosome biogenesis & translation	8	232	51	108	71	13	6	0.461538	-10.8	-7.8	6
ENSG00000239197	AC090985.1	not_expressed	host_not_expressed	143	6	H/ACA	Orphan	protein_coding	False	simple_initiation	Poorly characterized	1	35890	23386	12361	12332	5	5	1	-40.6	-1.1	3
ENSG00000249020	SNORA58	expressed	host_expressed	137	0	H/ACA	rRNA	protein_coding	True	dual_initiation	Ribosomal protein	7	16404	8448	7819	7789	10	4	0.4	-53.1	-6.9	5
ENSG00000251704	AC142283.1	not_expressed	intergenic	93	3	H/ACA	Orphan	intergenic	intergenic	intergenic	intergenic									-11.3	-0.6	3
ENSG00000251715	AL139003.2	not_expressed	intergenic	83	9	H/ACA	Orphan	intergenic	intergenic	intergenic	intergenic									-14.5	-6.3	7
ENSG00000251730	AC092960.1	not_expressed	host_expressed	135	9	H/ACA	Orphan	non_coding	False	simple_initiation	non_functional_ncRNA	3	1109	36	938	914	3	1	0.333333	-31.8	-2.6	2
ENSG00000251735	AL359951.1	not_expressed	intergenic	124	9	H/ACA	Orphan	intergenic	intergenic	intergenic	intergenic									-32	-3.2	4
ENSG00000251744	AC100807.1	not_expressed	intergenic	105	6	H/ACA	Orphan	intergenic	intergenic	intergenic	intergenic									-28.1	-2.2	3
ENSG00000251775	AC114748.1	not_expressed	intergenic	143	6	H/ACA	Orphan	intergenic	intergenic	intergenic	intergenic									-32.5	-1.9	0
ENSG00000251778	AP001619.3	not_expressed	intergenic	96	6	H/ACA	Orphan	intergenic	intergenic	intergenic	intergenic									-16.7	-5.3	4
ENSG00000251796	SNORA70	not_expressed	intergenic	138	9	H/ACA	Orphan	intergenic	intergenic	intergenic	intergenic									-31.4	-1.2	4
ENSG00000251802	AC004788.1	not_expressed	intergenic	133	0	H/ACA	Orphan	intergenic	intergenic	intergenic	intergenic									-26.7	-2.7	5
ENSG00000251815	SNORD116-26	expressed	host_expressed	96	2	C/D	rRNA	non_coding	False	simple_initiation	functional_ncRNA	50	4584	222	4266	4246	147	98	0.666667	-20.7	-12.8	9
ENSG00000251822	AC090022.1	not_expressed	intergenic	114	6	H/ACA	Orphan	intergenic	intergenic	intergenic	intergenic									-20.6	-0.7	3
ENSG00000251828	AC026410.4	not_expressed	intergenic	134	6	H/ACA	Orphan	intergenic	intergenic	intergenic	intergenic									-32.2	-2.9	5
ENSG00000251830	FO393410.1	not_expressed	intergenic	102	5	C/D	rRNA	intergenic	intergenic	intergenic	intergenic									-27.6	-3.3	3
ENSG00000251838	AC061997.1	not_expressed	intergenic	96	9	H/ACA	Orphan	intergenic	intergenic	intergenic	intergenic									-14.7	-3.1	4
ENSG00000251844	AC018659.1	not_expressed	intergenic	92	7	C/D	Orphan	intergenic	intergenic	intergenic	intergenic									-8.3	-4	5
ENSG00000251858	AL121821.1	not_expressed	intergenic	129	6	H/ACA	Orphan	intergenic	intergenic	intergenic	intergenic									-31.5	-6.3	6
ENSG00000251878	SNORD79	not_expressed	intergenic	84	4	C/D	rRNA	intergenic	intergenic	intergenic	intergenic									-12	-3.3	0
ENSG00000251893	SNORA70	not_expressed	host_not_expressed	153	9	H/ACA	Orphan	non_coding	False	simple_initiation	non_functional_ncRNA	3	60794	2802	57839	57803	4	2	0.5	-41.3	-5.2	8
ENSG00000251896	SNORD116-27	expressed	host_expressed	92	2	C/D	rRNA	non_coding	False	simple_initiation	functional_ncRNA	50	4584	2298	2194	2174	147	98	0.666667	-16	-14.9	10
ENSG00000251922	AL137186.3	not_expressed	host_not_expressed	141	0	H/ACA	Orphan	protein_coding	False	simple_initiation	Other	7	5160	860	4159	4123	7	1	0.142857	-41.9	-4.6	5
ENSG00000251925	SNORA70	not_expressed	intergenic	138	9	H/ACA	Orphan	intergenic	intergenic	intergenic	intergenic									-31.4	-2	0
ENSG00000251940	AC000081.2	not_expressed	intergenic	94	6	H/ACA	Orphan	intergenic	intergenic	intergenic	intergenic									-21.5	-10.9	5
ENSG00000251967	AC104304.1	not_expressed	intergenic	81	9	C/D	rRNA	intergenic	intergenic	intergenic	intergenic									-17.1	-6.1	2
ENSG00000251974	AC009408.2	not_expressed	intergenic	130	6	H/ACA	rRNA	intergenic	intergenic	intergenic	intergenic									-27.6	-4.6	5
ENSG00000251987	SNORD63	not_expressed	intergenic	80	5	C/D	rRNA	intergenic	intergenic	intergenic	intergenic									-16.7	-9	2
ENSG00000251999	AC018645.2	not_expressed	intergenic	133	0	H/ACA	Orphan	intergenic	intergenic	intergenic	intergenic									-26.3	-2.8	5
ENSG00000252011	AC113174.2	not_expressed	host_not_expressed	82	3	H/ACA	Orphan	non_coding	False	simple_initiation	non_functional_ncRNA	1	9439	6003	3354	3318	22	22	1	-22.6	-10	6
ENSG00000252014	SNORA70	not_expressed	host_expressed	110	6	H/ACA	Orphan	non_coding	False	simple_initiation	non_functional_ncRNA	1	45736	40308	5318	5297	4	4	1	-29.1	-1.6	6
ENSG00000252016	AL024493.1	not_expressed	intergenic	127	6	H/ACA	Orphan	intergenic	intergenic	intergenic	intergenic									-41.5	-10.7	9
ENSG00000252022	SNORD33	not_expressed	intergenic	88	5	C/D	rRNA	intergenic	intergenic	intergenic	intergenic									-15.9	-13.5	12
ENSG00000252040	AC126773.1	not_expressed	intergenic	132	0	H/ACA	Orphan	intergenic	intergenic	intergenic	intergenic									-38.3	-4.4	3
ENSG00000252045	AP000272.1	not_expressed	intergenic	136	0	H/ACA	rRNA	intergenic	intergenic	intergenic	intergenic									-34.3	-1.6	3
ENSG00000252049	AL139281.2	not_expressed	intergenic	117	9	H/ACA	Orphan	intergenic	intergenic	intergenic	intergenic									-22.8	-1.1	3
ENSG00000252050	AL606748.2	not_expressed	host_expressed	130	6	H/ACA	Orphan	protein_coding	True	simple_initiation	RNA binding, processing, splicing	7	5828	2375	3323	3294	20	14	0.7	-25.2	-1.3	5
ENSG00000252083	AC026784.1	not_expressed	intergenic	107	3	H/ACA	Orphan	intergenic	intergenic	intergenic	intergenic									-25.9	-6.4	5
ENSG00000252096	AL389886.1	not_expressed	intergenic	135	6	H/ACA	Orphan	intergenic	intergenic	intergenic	intergenic									-37.9	-6	8
ENSG00000252112	SNORD63	not_expressed	intergenic	64	6	C/D	rRNA	intergenic	intergenic	intergenic	intergenic									-9.9	-3.3	6
ENSG00000252119	AP002956.1	not_expressed	intergenic	117	6	H/ACA	Orphan	intergenic	intergenic	intergenic	intergenic									-45.4	-10.2	2
ENSG00000252122	AC009163.2	not_expressed	host_expressed	135	6	H/ACA	rRNA	protein_coding	True	dual_initiation	Poorly characterized	4	16619	2360	14124	14089	6	3	0.5	-44.6	-2.6	7
ENSG00000252128	SNORD27	not_expressed	intergenic	72	5	C/D	rRNA	intergenic	intergenic	intergenic	intergenic									-3.8	-4.3	4
ENSG00000252129	SNORA74	not_expressed	intergenic	180	6	H/ACA	Orphan	intergenic	intergenic	intergenic	intergenic									-58.2	-5.4	5
ENSG00000252133	SNORA70	not_expressed	intergenic	95	6	H/ACA	Orphan	intergenic	intergenic	intergenic	intergenic									-26.2	-0.3	4
ENSG00000252136	AC004069.3	not_expressed	host_not_expressed	108	6	H/ACA	Orphan	non_coding	False	simple_initiation	non_functional_ncRNA	5	55358	44514	10736	10711	6	2	0.333333	-20.1	-5.1	0
ENSG00000252138	AC005774.1	not_expressed	intergenic	111	9	H/ACA	Orphan	intergenic	intergenic	intergenic	intergenic									-25.9	-4.6	6
ENSG00000252158	SNORA72	not_expressed	intergenic	94	9	H/ACA	snRNA	intergenic	intergenic	intergenic	intergenic									-10.8	-9.1	9
ENSG00000252170	AL138745.1	not_expressed	intergenic	72	2	C/D	Orphan	intergenic	intergenic	intergenic	intergenic									-14	-2.1	3
ENSG00000252188	AC013429.2	not_expressed	host_expressed	120	3	H/ACA	Orphan	protein_coding	False	simple_initiation	Poorly characterized	13	4837	791	3926	3893	15	3	0.2	-15.5	-5.1	7
ENSG00000252192	AC127002.1	not_expressed	host_expressed	129	6	H/ACA	Orphan	protein_coding	True	dual_initiation	RNA binding, processing, splicing	3	2151	475	1547	1507	13	11	0.846154	-36.6	-4.8	7
ENSG00000252199	SNORA70	not_expressed	intergenic	95	6	H/ACA	Orphan	intergenic	intergenic	intergenic	intergenic									-31.2	-0.6	4
ENSG00000252200	AC243964.2	not_expressed	intergenic	75	7	C/D	Orphan	intergenic	intergenic	intergenic	intergenic									-32.1	-9.3	6
ENSG00000252204	AC023050.2	not_expressed	intergenic	103	9	H/ACA	Orphan	intergenic	intergenic	intergenic	intergenic									-12.6	-1	3
ENSG00000252213	SNORA74D	expressed	host_expressed	141	9	H/ACA	rRNA	non_coding	False	simple_initiation	functional_ncRNA	2	2180	31	2008	1985	6	5	0.833333	-64.8	-6	5
ENSG00000252228	AL669914.1	not_expressed	intergenic	162	0	H/ACA	Orphan	intergenic	intergenic	intergenic	intergenic									-33.4	-2.5	3
ENSG00000252230	AC020910.1	not_expressed	host_expressed	86	8	C/D	rRNA	protein_coding	False	simple_initiation	Poorly characterized	1	79039	37850	41103	41062	3	3	1	-12.5	-4.4	5
ENSG00000252236	AL135927.1	not_expressed	intergenic	141	6	H/ACA	rRNA	intergenic	intergenic	intergenic	intergenic									-44.3	-3	3
ENSG00000252238	AC092169.1	not_expressed	intergenic	84	9	H/ACA	Orphan	intergenic	intergenic	intergenic	intergenic									-23.2	-6	10
ENSG00000252249	AL391336.2	not_expressed	intergenic	124	6	H/ACA	Orphan	intergenic	intergenic	intergenic	intergenic									-22.5	-4.5	3
ENSG00000252258	SNORA70	not_expressed	intergenic	133	6	H/ACA	Orphan	intergenic	intergenic	intergenic	intergenic									-45.7	-10.4	4
ENSG00000252277	SNORD116-30	not_expressed	host_expressed	85	3	C/D	rRNA	non_coding	False	simple_initiation	functional_ncRNA	54	963	231	647	619	147	94	0.639456	-13	-10.7	10
ENSG00000252284	SNORA108	not_expressed	intergenic	68	9	H/ACA	Orphan	intergenic	intergenic	intergenic	intergenic									-15.9	-1.6	1
ENSG00000252290	AL442065.1	not_expressed	intergenic	132	9	H/ACA	Orphan	intergenic	intergenic	intergenic	intergenic									-23.3	-5.6	8
ENSG00000252291	AC079173.1	not_expressed	host_expressed	106	6	H/ACA	Orphan	protein_coding	False	simple_initiation	Poorly characterized	3	121566	89247	32213	32183	6	4	0.666667	-24.5	-0.9	3
ENSG00000252296	AL359641.2	not_expressed	intergenic	89	9	H/ACA	Orphan	intergenic	intergenic	intergenic	intergenic									-25	-4.1	4
ENSG00000252305	AC005389.1	not_expressed	host_expressed	180	6	H/ACA	Orphan	protein_coding	False	simple_initiation	Other	5	32045	17185	14680	14653	13	9	0.692308	-60.6	-5.4	5
ENSG00000252326	SNORD116-25	expressed	host_expressed	92	2	C/D	rRNA	non_coding	False	simple_initiation	functional_ncRNA	48	1281	225	964	944	147	100	0.680272	-20.5	-14.9	10
ENSG00000252337	AC114940.2	not_expressed	intergenic	139	9	H/ACA	Orphan	intergenic	intergenic	intergenic	intergenic									-41.9	-1.8	3
ENSG00000252349	AC005722.2	not_expressed	host_expressed	91	6	H/ACA	Orphan	protein_coding	True	simple_initiation	Other	7	2068	733	1244	1210	11	5	0.454545	-19.1	-0.7	3
ENSG00000252352	AC115085.1	not_expressed	intergenic	86	9	H/ACA	Orphan	intergenic	intergenic	intergenic	intergenic									-6.5	-3.4	3
ENSG00000252408	AC005787.1	not_expressed	intergenic	73	3	C/D	Orphan	intergenic	intergenic	intergenic	intergenic									-6.7	-4	4
ENSG00000252425	AC100834.1	not_expressed	intergenic	101	0	H/ACA	Orphan	intergenic	intergenic	intergenic	intergenic									-20.4	-4.3	0
ENSG00000252427	AC115088.1	not_expressed	host_expressed	108	4	C/D	Orphan	protein_coding	True	dual_initiation	RNA binding, processing, splicing	35	3859	51	3700	3660	43	9	0.209302	-28	-7.9	5
ENSG00000252433	AL133320.1	not_expressed	host_expressed	135	6	H/ACA	rRNA	protein_coding	False	simple_initiation	Poorly characterized	7	6920	460	6325	6286	9	3	0.333333	-34.6	-9.4	7
ENSG00000252438	AL391314.1	not_expressed	host_expressed	73	9	C/D	Orphan	protein_coding	False	simple_initiation	Other	1	203318	66019	137226	137197	10	10	1	-8.2	-6	5
ENSG00000252441	AL589842.1	not_expressed	intergenic	81	6	H/ACA	rRNA	intergenic	intergenic	intergenic	intergenic									-28.3	-5.2	4
ENSG00000252443	SNORA62	not_expressed	intergenic	120	9	H/ACA	Orphan	intergenic	intergenic	intergenic	intergenic									-27.5	-1.4	3
ENSG00000252448	SNORA63	not_expressed	intergenic	81	9	H/ACA	rRNA	intergenic	intergenic	intergenic	intergenic									-13.6	-2.7	5
ENSG00000252458	AC134043.1	not_expressed	host_not_expressed	129	6	H/ACA	rRNA	non_coding	False	simple_initiation	non_functional_ncRNA	2	15346	878	14339	14306	2	1	0.5	-26.7	-4.6	5
ENSG00000252459	AC026765.1	not_expressed	host_not_expressed	95	3	H/ACA	rRNA	non_coding	False	simple_initiation	non_functional_ncRNA	3	22353	11959	10299	10269	4	2	0.5	-24.6	-5.7	4
ENSG00000252461	AC133550.1	not_expressed	intergenic	128	0	H/ACA	rRNA	intergenic	intergenic	intergenic	intergenic									-20.7	-4.4	4
ENSG00000252473	AC007684.1	not_expressed	host_expressed	135	9	H/ACA	Orphan	protein_coding	False	simple_initiation	Other	21	4301	3062	1104	1066	33	13	0.393939	-32.1	-5.2	10
ENSG00000252505	SNORA70	not_expressed	intergenic	98	6	H/ACA	snRNA	intergenic	intergenic	intergenic	intergenic									-31	-4.3	5
ENSG00000252517	AC006196.1	not_expressed	intergenic	68	5	C/D	Orphan	intergenic	intergenic	intergenic	intergenic									-9.8	0	0
ENSG00000252526	SNORA70	not_expressed	intergenic	90	6	H/ACA	Orphan	intergenic	intergenic	intergenic	intergenic									-29.3	-2.7	4
ENSG00000252537	AL358033.1	not_expressed	intergenic	116	9	H/ACA	Orphan	intergenic	intergenic	intergenic	intergenic									-27.2	-5.8	8
ENSG00000252542	SNORD36C	expressed	host_expressed	66	4	C/D	rRNA	protein_coding	True	dual_initiation	Ribosomal protein	6	278	121	91	64	7	2	0.285714	-11.5	-10.9	8
ENSG00000252550	AL138701.1	not_expressed	intergenic	121	9	H/ACA	rRNA	intergenic	intergenic	intergenic	intergenic									-26.3	-3.9	7
ENSG00000252580	AL451137.1	not_expressed	intergenic	132	6	H/ACA	Orphan	intergenic	intergenic	intergenic	intergenic									-35.3	-1.2	3
ENSG00000252582	AL583807.1	not_expressed	intergenic	139	3	H/ACA	Orphan	intergenic	intergenic	intergenic	intergenic									-38.7	-0.5	2
ENSG00000252601	AC024589.2	not_expressed	host_expressed	115	6	H/ACA	Orphan	non_coding	False	simple_initiation	non_functional_ncRNA	1	352271	260349	91807	91780	1	1	1	-28.4	-3.5	8
ENSG00000252640	AC126773.2	not_expressed	intergenic	118	3	H/ACA	snRNA	intergenic	intergenic	intergenic	intergenic									-38.3	-11.9	0
ENSG00000252657	SNORA70	not_expressed	host_not_expressed	126	6	H/ACA	Orphan	non_coding	False	simple_initiation	non_functional_ncRNA	1	19271	16427	2718	2691	2	2	1	-45.5	-1.8	4
ENSG00000252677	AC106037.1	not_expressed	intergenic	170	9	H/ACA	Orphan	intergenic	intergenic	intergenic	intergenic									-48.2	-0.9	2
ENSG00000252682	AL354980.1	not_expressed	intergenic	68	4	C/D	snRNA	intergenic	intergenic	intergenic	intergenic									-14.9	-4.8	4
ENSG00000252689	AC011749.1	not_expressed	intergenic	132	9	H/ACA	Orphan	intergenic	intergenic	intergenic	intergenic									-30.3	-5.9	4
ENSG00000252692	AC244035.3	not_expressed	host_not_expressed	86	7	C/D	rRNA	protein_coding	False	simple_initiation	Other	1	44471	26975	17410	17388	5	5	1	-15	-8.3	9
ENSG00000252693	AL391241.1	not_expressed	host_expressed	107	3	H/ACA	Orphan	protein_coding	True	dual_initiation	Other	2	408078	193997	213974	213949	3	2	0.666667	-22.9	-2.2	6
ENSG00000252699	SNORA21B	expressed	host_expressed	136	6	H/ACA	rRNA	protein_coding	False	dual_initiation	Ribosomal protein	3	2132	946	1050	1017	5	3	0.6	-54.5	-8.6	7
ENSG00000252719	AL356785.1	not_expressed	intergenic	131	6	H/ACA	Orphan	intergenic	intergenic	intergenic	intergenic									-22.2	-4.7	7
ENSG00000252724	CR769767.2	not_expressed	intergenic	95	6	H/ACA	Orphan	intergenic	intergenic	intergenic	intergenic									-26.2	-0.6	4
ENSG00000252762	AC021863.1	not_expressed	intergenic	127	3	H/ACA	Orphan	intergenic	intergenic	intergenic	intergenic									-32.8	-1.4	3
ENSG00000252774	AC087632.1	not_expressed	intergenic	160	6	H/ACA	Orphan	intergenic	intergenic	intergenic	intergenic									-36.6	-4	6
ENSG00000252824	AC005086.1	not_expressed	intergenic	89	6	H/ACA	rRNA	intergenic	intergenic	intergenic	intergenic									-22.3	-3.7	5
ENSG00000252840	AL365436.3	not_expressed	intergenic	108	9	H/ACA	Orphan	intergenic	intergenic	intergenic	intergenic									-24.8	-16.1	17
ENSG00000252852	AP002848.1	not_expressed	host_not_expressed	134	0	H/ACA	Orphan	non_coding	False	simple_initiation	non_functional_ncRNA	1	50384	48212	2038	2012	2	2	1	-40.6	-4	4
ENSG00000252868	AC061965.1	not_expressed	intergenic	112	6	C/D	Orphan	intergenic	intergenic	intergenic	intergenic									-34.5	-5.1	5
ENSG00000252870	AP003179.1	not_expressed	intergenic	156	9	H/ACA	Orphan	intergenic	intergenic	intergenic	intergenic									-47.6	-1.1	3
ENSG00000252888	AC013738.1	not_expressed	intergenic	126	6	H/ACA	Orphan	intergenic	intergenic	intergenic	intergenic									-26.3	-1.7	1
ENSG00000252904	AC010359.1	not_expressed	intergenic	137	9	H/ACA	Orphan	intergenic	intergenic	intergenic	intergenic									-26.7	-6.2	5
ENSG00000252917	SNORA74	not_expressed	intergenic	154	6	H/ACA	Orphan	intergenic	intergenic	intergenic	intergenic									-51.5	-8.8	5
ENSG00000252920	AL356867.2	not_expressed	intergenic	133	9	H/ACA	Orphan	intergenic	intergenic	intergenic	intergenic									-36.3	-2.5	4
ENSG00000252945	AL133485.1	not_expressed	intergenic	88	5	C/D	Orphan	intergenic	intergenic	intergenic	intergenic									-17.3	-4.1	7
ENSG00000252969	SNORA70	not_expressed	intergenic	124	6	H/ACA	Orphan	intergenic	intergenic	intergenic	intergenic									-29.4	-7	7
ENSG00000252985	SNORD116	not_expressed	host_expressed	78	5	C/D	rRNA	protein_coding	False	simple_initiation	Other	7	59424	4946	54400	54371	9	3	0.333333	-8.2	-8.3	5
ENSG00000252989	AC069223.1	not_expressed	host_expressed	77	0	H/ACA	rRNA	protein_coding	False	simple_initiation	Poorly characterized	9	464	14	373	347	15	7	0.466667	-14.7	-5.6	7
ENSG00000252993	AL365398.1	not_expressed	intergenic	124	9	H/ACA	Orphan	intergenic	intergenic	intergenic	intergenic									-22.2	-7.3	7
ENSG00000253007	SNORA50B	expressed	host_expressed	135	0	H/ACA	rRNA	protein_coding	False	simple_initiation	Other	3	110706	56452	54119	54084	15	13	0.866667	-51.1	-5.9	5
ENSG00000253013	AC104070.1	not_expressed	host_expressed	135	9	H/ACA	Orphan	protein_coding	False	simple_initiation	Poorly characterized	1	43534	24380	19019	18999	13	13	1	-31.7	-2.4	4
ENSG00000253027	SNORA70	not_expressed	intergenic	151	9	H/ACA	Orphan	intergenic	intergenic	intergenic	intergenic									-49.2	-4.5	5
ENSG00000253028	AC006320.1	not_expressed	intergenic	133	3	H/ACA	Orphan	intergenic	intergenic	intergenic	intergenic									-41.9	-3.9	3
ENSG00000253041	AL359893.2	not_expressed	host_expressed	57	9	H/ACA	Orphan	protein_coding	False	simple_initiation	Poorly characterized	7	6532	4982	1493	1470	7	1	0.142857	-8.9	-5	3
ENSG00000253042	SNORA70	not_expressed	intergenic	118	9	H/ACA	Orphan	intergenic	intergenic	intergenic	intergenic									-24.6	-2.7	3
ENSG00000253047	AL356356.1	not_expressed	intergenic	121	9	H/ACA	Orphan	intergenic	intergenic	intergenic	intergenic									-26.5	-6.5	5
ENSG00000253049	AC024060.1	not_expressed	intergenic	103	3	H/ACA	Orphan	intergenic	intergenic	intergenic	intergenic									-28.2	-10.1	7
ENSG00000253051	SNORA31B	expressed	host_expressed	134	0	H/ACA	snRNA	protein_coding	True	dual_initiation	RNA binding, processing, splicing	0	0	0	0	0	5	0	0	-36	-3.6	4
ENSG00000253059	AL137818.1	not_expressed	intergenic	137	0	H/ACA	Orphan	intergenic	intergenic	intergenic	intergenic									-43	-1.6	1
ENSG00000253065	AC008705.1	not_expressed	intergenic	115	3	H/ACA	Orphan	intergenic	intergenic	intergenic	intergenic									-24.1	-3.5	7
ENSG00000253067	AC034216.1	not_expressed	intergenic	68	16	C/D	Orphan	intergenic	intergenic	intergenic	intergenic									-19.8	-7.8	4
ENSG00000253072	AC104361.1	not_expressed	intergenic	86	9	C/D	Orphan	intergenic	intergenic	intergenic	intergenic									-8.8	-1.2	5
ENSG00000253090	SNORA73	not_expressed	intergenic	115	6	H/ACA	Orphan	intergenic	intergenic	intergenic	intergenic									-32.1	-1.7	0
ENSG00000253092	AC092960.2	not_expressed	host_expressed	198	9	H/ACA	rRNA	non_coding	False	simple_initiation	non_functional_ncRNA	2	1503	56	1249	1221	3	2	0.666667	-39.6	-6	6
ENSG00000253094	AL162853.1	not_expressed	intergenic	80	6	C/D	rRNA	intergenic	intergenic	intergenic	intergenic									-6.8	-0.5	3
ENSG00000254341	SNORD87	expressed	host_expressed	89	2	C/D	rRNA	non_coding	True	simple_initiation	functional_ncRNA	2	225	60	76	38	3	2	0.666667	-15.3	-7.8	6
ENSG00000261709	AC051619.8	not_expressed	host_not_expressed	128	6	H/ACA	Orphan	non_coding	False	simple_initiation	non_functional_ncRNA	0	0	0	0	0	0	0		-42.3	-3.3	3
ENSG00000262074	SNORD3B-2	expressed	intergenic	791	5	C/D	Orphan	intergenic	intergenic	intergenic	intergenic									-307	-8.1	6
ENSG00000263666	SNORA70D	not_expressed	host_expressed	135	6	H/ACA	rRNA	protein_coding	False	simple_initiation	Other	3	11892	3898	7859	7817	18	16	0.888889	-42.3	-9.6	7
ENSG00000263723	SNORD39	not_expressed	host_expressed	79	6	C/D	Orphan	protein_coding	False	simple_initiation	Other	1	14921	10178	4664	4642	3	3	1	-29.1	-8.4	1
ENSG00000263764	SNORD43	expressed	host_expressed	64	5	C/D	rRNA	protein_coding	True	simple_initiation	Ribosomal protein	1	1006	483	459	420	9	9	1	-18.1	-17.8	12
ENSG00000263776	SNORA4	expressed	host_expressed	138	6	H/ACA	rRNA	protein_coding	True	dual_initiation	Ribosome biogenesis & translation	9	222	29	55	33	11	3	0.272727	-42.3	-3.8	4
ENSG00000263934	SNORD3A	expressed	intergenic	699	6	C/D	snRNA	intergenic	intergenic	intergenic	intergenic									-262.7	-6.6	10
ENSG00000264294	SNORD55	expressed	host_expressed	80	3	C/D	rRNA	protein_coding	True	dual_initiation	Ribosomal protein	1	437	265	92	64	5	5	1	-22.3	-23.2	10
ENSG00000264346	SNORA77B	expressed	host_expressed	125	0	H/ACA	rRNA	protein_coding	True	simple_initiation	Other	5	587	35	427	405	5	1	0.2	-43.4	-11.4	7
ENSG00000264379	SNORD39	not_expressed	host_not_expressed	76	7	C/D	Orphan	non_coding	False	simple_initiation	functional_ncRNA	1	82200	35108	47016	46987	3	3	1	-12.7	-2.6	5
ENSG00000264452	AP001065.1	not_expressed	host_expressed	76	11	C/D	Orphan	protein_coding	False	simple_initiation	Other	0	1945	1869	0	0	32	0	0	-25.7	-12.5	2
ENSG00000264549	SNORD95	expressed	host_expressed	68	1	C/D	rRNA	protein_coding	False	simple_initiation	Ribosome biogenesis & translation	1	1350	314	968	937	8	8	1	-20.2	-31.7	13
ENSG00000264940	SNORD3C	expressed	intergenic	581	5	C/D	rRNA	intergenic	intergenic	intergenic	intergenic									-224	-14.2	9
ENSG00000264994	SNORD92	expressed	host_expressed	85	1	C/D	rRNA	protein_coding	True	dual_initiation	RNA binding, processing, splicing	4	1362	955	322	300	17	14	0.823529	-25.9	-12.9	13
ENSG00000264997	SNORD39	not_expressed	intergenic	71	5	C/D	Orphan	intergenic	intergenic	intergenic	intergenic									-15.2	-3.5	5
ENSG00000265145	SNORD53	expressed	host_expressed	78	1	C/D	rRNA	protein_coding	True	dual_initiation	RNA binding, processing, splicing	9	1018	514	426	400	17	9	0.529412	-18.2	-11.8	9
ENSG00000265185	SNORD3B-1	expressed	intergenic	758	6	C/D	Orphan	intergenic	intergenic	intergenic	intergenic									-288.2	-11.6	6
ENSG00000265236	SNORD84	expressed	host_expressed	78	2	C/D	Orphan	protein_coding	False	simple_initiation	RNA binding, processing, splicing	1	1289	773	438	405	10	10	1	-19.8	-16.5	10
ENSG00000265706	SNORD53B	expressed	host_expressed	78	1	C/D	rRNA	protein_coding	True	dual_initiation	RNA binding, processing, splicing	10	1882	284	1520	1499	17	8	0.470588	-22.9	-19.4	12
ENSG00000265733	SNORA74C-1	not_expressed	host_expressed	201	6	H/ACA	Orphan	protein_coding	True	simple_initiation	Other	4	2456	1681	574	542	6	3	0.5	-70.2	-4.8	0
ENSG00000266079	SNORA59B	expressed	host_expressed	701	3	H/ACA	rRNA	protein_coding	True	dual_initiation	Other	10	4129	1150	2278	2250	18	9	0.5	-162.8	-3.2	5
ENSG00000266692	AP001065.2	not_expressed	host_expressed	55	10	C/D	Orphan	protein_coding	False	simple_initiation	Other	0	1948	0	1893	0	32	0	0	-15.8	-8.7	8
ENSG00000271798	SNORA51	expressed	host_expressed	132	0	H/ACA	rRNA	protein_coding	True	simple_initiation	Ribosome biogenesis & translation	5	381	121	128	103	13	9	0.692308	-47.5	-6.6	3
ENSG00000271817	U3	not_expressed	host_expressed	219	6	C/D	Orphan	protein_coding	True	simple_initiation	Other	9	4296	1562	2515	2484	12	4	0.333333	-72	-6.1	4
ENSG00000271852	SNORD11B	expressed	host_expressed	90	2	C/D	rRNA	protein_coding	True	dual_initiation	Ribosome biogenesis & translation	8	1510	63	1357	1333	14	7	0.5	-23.2	-5.5	7
ENSG00000271907	SNORA35B	expressed	host_not_expressed	129	0	H/ACA	rRNA	protein_coding	False	simple_initiation	Poorly characterized	16	2844	400	2315	2280	20	5	0.25	-35.5	-4.1	4
ENSG00000271922	AC134026.1	not_expressed	intergenic	104	5	C/D	Orphan	intergenic	intergenic	intergenic	intergenic									-25.5	-4.4	4
ENSG00000271982	SNORD58B	expressed	host_expressed	66	4	C/D	rRNA	protein_coding	False	dual_initiation	Ribosomal protein	2	155	8	81	46	7	6	0.857143	-6.3	-8.9	7
ENSG00000272015	SNORA62	not_expressed	host_not_expressed	83	9	H/ACA	Orphan	non_coding	False	simple_initiation	non_functional_ncRNA	1	14850	5893	8874	8850	1	1	1	-20.4	-7.1	4
ENSG00000272025	SNORA74	not_expressed	intergenic	199	0	H/ACA	Orphan	intergenic	intergenic	intergenic	intergenic									-76.3	-4.1	6
ENSG00000272034	SNORD14A	expressed	host_expressed	91	3	C/D	rRNA	protein_coding	False	dual_initiation	Ribosomal protein	5	634	354	189	159	5	1	0.2	-15.8	-15.7	11
ENSG00000272166	AC093416.1	not_expressed	intergenic	64	6	C/D	rRNA	intergenic	intergenic	intergenic	intergenic									-2.5	-4.2	3
ENSG00000272237	AC073065.2	not_expressed	host_expressed	114	9	H/ACA	Orphan	protein_coding	False	simple_initiation	Poorly characterized	2	4436	2209	2113	2084	13	12	0.923077	-19.4	-4.8	5
ENSG00000272296	SNORD96A	expressed	host_expressed	79	3	C/D	rRNA	protein_coding	False	simple_initiation	Ribosome biogenesis & translation	2	538	283	176	139	8	7	0.875	-22	-21.7	17
ENSG00000272344	SNORD114-21	expressed	host_expressed	72	1	C/D	Orphan	non_coding	False	simple_initiation	non_functional_ncRNA	32	1844	1313	459	434	36	5	0.138889	-19.5	-6.4	5
ENSG00000272460	SNORD115-40	expressed	host_expressed	82	0	C/D	Orphan	non_coding	False	simple_initiation	functional_ncRNA	128	386	58	246	218	147	20	0.136054	-17.3	-23.2	16
ENSG00000272474	SNORD113-5	expressed	host_expressed	78	2	C/D	Orphan	non_coding	False	simple_initiation	non_functional_ncRNA	7	1395	700	617	596	36	30	0.833333	-17.9	-2.2	4
ENSG00000272533	SNORA28	expressed	host_expressed	126	6	H/ACA	Orphan	protein_coding	True	dual_initiation	Ribosome biogenesis & translation	6	1103	623	354	327	11	6	0.545455	-32.8	-5.1	7
ENSG00000273499	AC087893.1	not_expressed	intergenic	128	9	H/ACA	Orphan	intergenic	intergenic	intergenic	intergenic									-27.1	-3.5	2
ENSG00000273544	SNORA44	expressed	host_expressed	132	3	H/ACA	rRNA	non_coding	True	simple_initiation	functional_ncRNA	3	582	49	401	362	5	3	0.6	-44.5	-13.7	9
ENSG00000273587	SNORA78	expressed	host_expressed	127	6	H/ACA	rRNA	non_coding	False	simple_initiation	non_functional_ncRNA	1	280	56	97	77	1	1	1	-65	-12.6	7
ENSG00000273614	CU633980.1	not_expressed	host_not_expressed	128	6	H/ACA	Orphan	protein_coding	False	simple_initiation	Poorly characterized	2	8973	2418	6427	6391	2	1	0.5	-50.2	-10.3	6
ENSG00000273788	U3	not_expressed	intergenic	216	9	C/D	rRNA	intergenic	intergenic	intergenic	intergenic									-63	-1.8	4
ENSG00000273835	SNORD115-13	expressed	host_expressed	82	0	C/D	Orphan	non_coding	False	simple_initiation	functional_ncRNA	85	1888	1560	246	219	147	63	0.428571	-18	-15.5	12
ENSG00000273885	AP003499.2	expressed	host_expressed	70	1	C/D	Orphan	protein_coding	False	simple_initiation	Other	19	545	386	89	58	29	11	0.37931	-10.2	-16.9	12
ENSG00000274091	SNORD1C	expressed	host_expressed	78	2	C/D	rRNA	non_coding	True	dual_initiation	functional_ncRNA	3	348	192	78	50	5	3	0.6	-17.7	-10.6	14
ENSG00000274266	SNORA73A	expressed	host_expressed	206	0	H/ACA	rRNA	non_coding	False	dual_initiation	functional_ncRNA	1	2047	1283	558	534	2	2	1	-71.2	-1.4	3
ENSG00000274309	SNORA71E	expressed	host_expressed	132	0	H/ACA	rRNA	non_coding	False	simple_initiation	non_functional_ncRNA	2	1042	462	448	423	4	3	0.75	-56.3	-1.1	0
ENSG00000274458	AL590730.2	not_expressed	host_not_expressed	128	3	H/ACA	rRNA	non_coding	False	simple_initiation	non_functional_ncRNA	0	3222	0	3094	0	2	0	0	-33.8	-0.4	3
ENSG00000274535	SNORD39	not_expressed	host_expressed	78	6	C/D	rRNA	protein_coding	False	simple_initiation	Poorly characterized	4	21456	5721	15657	15617	4	1	0.25	-15.3	-6.9	7
ENSG00000274544	SNORD28	expressed	host_expressed	75	4	C/D	rRNA	non_coding	True	dual_initiation	functional_ncRNA	4	340	194	71	37	10	7	0.7	-13.8	-11.5	7
ENSG00000274582	SNORA16A	expressed	host_expressed	137	6	H/ACA	rRNA	non_coding	True	simple_initiation	functional_ncRNA	2	451	39	275	242	5	4	0.8	-42.3	-5.3	6
ENSG00000274640	SNORD109A	expressed	host_expressed	67	1	C/D	rRNA	non_coding	False	simple_initiation	functional_ncRNA	23	30344	21214	9063	9038	147	125	0.85034	-16.3	-18.9	13
ENSG00000274998	SNORA17A	expressed	host_expressed	133	0	H/ACA	rRNA	non_coding	True	dual_initiation	functional_ncRNA	2	633	168	332	300	5	4	0.8	-53.1	-12.2	9
ENSG00000275043	SNORD25	expressed	host_expressed	69	3	C/D	rRNA	non_coding	True	dual_initiation	functional_ncRNA	1	402	234	99	63	10	10	1	-14.7	-18.3	11
ENSG00000275072	SNORD50B	expressed	host_expressed	70	2	C/D	rRNA	non_coding	True	dual_initiation	functional_ncRNA	4	306	138	98	71	8	5	0.625	-11.5	-13.3	11
ENSG00000275084	SNORD91B	expressed	host_expressed	222	5	C/D	rRNA	protein_coding	True	simple_initiation	Ribosome biogenesis & translation	11	3926	107	3597	3556	14	4	0.285714	-57.9	-8.4	4
ENSG00000275127	SNORD116-22	expressed	host_expressed	92	2	C/D	rRNA	non_coding	False	simple_initiation	functional_ncRNA	44	1727	58	1577	1545	147	104	0.707483	-18.4	-15.3	8
ENSG00000275146	AP003499.3	expressed	host_expressed	80	2	C/D	Orphan	protein_coding	False	simple_initiation	Other	19	545	131	334	303	29	11	0.37931	-13.4	-3.6	2
ENSG00000275154	U3	not_expressed	host_expressed	216	6	C/D	Orphan	protein_coding	False	simple_initiation	Poorly characterized	5	11185	4289	6680	6644	26	22	0.846154	-65.7	-5.9	7
ENSG00000275524	SNORD115-26	expressed	host_expressed	82	0	C/D	rRNA	non_coding	False	simple_initiation	functional_ncRNA	107	367	54	231	203	147	41	0.278912	-21.3	-25.1	14
ENSG00000275529	SNORD116-4	expressed	host_expressed	96	2	C/D	rRNA	non_coding	False	simple_initiation	functional_ncRNA	27	2015	245	1674	1649	147	121	0.823129	-20.5	-14.3	12
ENSG00000275662	SNORD112	expressed	host_expressed	77	2	C/D	Orphan	non_coding	False	simple_initiation	non_functional_ncRNA	2	1228	189	962	936	25	24	0.96	-16	-7.2	10
ENSG00000275900	AC012588.2	not_expressed	host_expressed	214	10	C/D	Orphan	non_coding	False	simple_initiation	non_functional_ncRNA	0	0	0	0	0	1	0	0	-67.7	-3.1	4
ENSG00000275994	SNORA24	expressed	host_expressed	131	0	H/ACA	rRNA	non_coding	True	dual_initiation	functional_ncRNA	2	255	54	70	48	3	2	0.666667	-35.3	-3.6	5
ENSG00000275996	SNORD27	expressed	host_expressed	72	5	C/D	rRNA	non_coding	True	dual_initiation	functional_ncRNA	3	198	51	75	41	10	8	0.8	-8.2	-6.9	5
ENSG00000276094	SNORA70	not_expressed	intergenic	95	6	H/ACA	Orphan	intergenic	intergenic	intergenic	intergenic									-28	-0.3	4
ENSG00000276314	SNORD107	expressed	host_expressed	75	1	C/D	Orphan	non_coding	False	simple_initiation	functional_ncRNA	14	18285	1911	16299	16268	147	134	0.911565	-10	-17.1	15
ENSG00000276366	U3	not_expressed	intergenic	228	4	C/D	Orphan	intergenic	intergenic	intergenic	intergenic									-72.9	-8.2	10
ENSG00000276610	SNORD64	expressed	host_expressed	67	0	C/D	Orphan	non_coding	False	simple_initiation	functional_ncRNA	15	15932	2664	13201	13178	147	133	0.904762	-13.1	-17.1	11
ENSG00000276643	AL627443.2	not_expressed	host_not_expressed	72	3	C/D	Orphan	non_coding	False	simple_initiation	non_functional_ncRNA	0	0	0	0	0	2	0	0	-12.6	-5.1	0
ENSG00000276788	SNORD26	expressed	host_expressed	75	3	C/D	rRNA	non_coding	True	dual_initiation	functional_ncRNA	2	211	59	77	38	10	9	0.9	-10.9	-13.5	13
ENSG00000276844	SNORD115-46	not_expressed	host_expressed	71	4	C/D	Orphan	non_coding	False	simple_initiation	functional_ncRNA	139	14582	14259	252	226	147	9	0.0612245	-7.7	-5.5	5
ENSG00000277034	SNORA71	not_expressed	host_expressed	128	9	H/ACA	Orphan	non_coding	False	dual_initiation	functional_ncRNA	6	992	314	550	517	8	3	0.375	-32.3	-5.2	3
ENSG00000277108	SNORD49B	expressed	host_expressed	72	4	C/D	rRNA	non_coding	False	dual_initiation	non_functional_ncRNA	2	774	92	610	587	7	6	0.857143	-15.2	-11.1	7
ENSG00000277184	SNORA9	expressed	host_expressed	133	6	H/ACA	rRNA	non_coding	True	simple_initiation	functional_ncRNA	2	1598	512	953	911	4	3	0.75	-46.2	-9.8	7
ENSG00000277194	SNORD22	expressed	host_expressed	126	4	C/D	rRNA	non_coding	True	dual_initiation	functional_ncRNA	9	239	41	72	35	10	2	0.2	-46.3	-6	0
ENSG00000277370	SNORD49A	expressed	host_expressed	71	4	C/D	rRNA	non_coding	False	dual_initiation	non_functional_ncRNA	2	774	623	80	57	7	6	0.857143	-16.6	-20.3	14
ENSG00000277512	SNORD65	expressed	host_expressed	73	4	C/D	rRNA	non_coding	False	dual_initiation	non_functional_ncRNA	4	21706	97	21536	21509	7	4	0.571429	-14.5	-7.8	7
ENSG00000277754	AL355836.2	not_expressed	host_not_expressed	216	4	C/D	Orphan	non_coding	False	simple_initiation	non_functional_ncRNA	1	16031	6038	9777	9737	1	1	1	-71	-5.8	7
ENSG00000277785	SNORD116-21	expressed	host_expressed	92	2	C/D	rRNA	non_coding	False	simple_initiation	functional_ncRNA	43	2018	1206	720	700	147	105	0.714286	-17.4	-14.3	10
ENSG00000277846	SNORD30	expressed	host_expressed	70	2	C/D	rRNA	non_coding	True	dual_initiation	functional_ncRNA	7	214	70	74	33	10	4	0.4	-13.3	-5.3	8
ENSG00000277887	SNORA50C	expressed	host_expressed	133	0	H/ACA	rRNA	non_coding	False	simple_initiation	non_functional_ncRNA	0	0	0	0	0	1	0	0	-69.3	-8.2	0
ENSG00000277947	SNORD3D	expressed	host_expressed	218	8	C/D	Orphan	non_coding	False	simple_initiation	non_functional_ncRNA	0	0	0	0	0	0	0		-76.9	-13.3	6
ENSG00000277985	SNORA67	expressed	host_expressed	137	0	H/ACA	rRNA	protein_coding	True	dual_initiation	Ribosome biogenesis & translation	9	252	40	75	52	10	2	0.2	-43.6	-12.8	7
ENSG00000278010	SNORA70	not_expressed	intergenic	95	6	H/ACA	Orphan	intergenic	intergenic	intergenic	intergenic									-26.2	-0.6	4
ENSG00000278089	SNORD115-7	not_expressed	host_expressed	82	3	C/D	Orphan	non_coding	False	simple_initiation	functional_ncRNA	75	387	58	247	219	147	73	0.496599	-15.9	-21.3	14
ENSG00000278123	SNORD116-28	not_expressed	host_expressed	91	3	C/D	rRNA	non_coding	False	simple_initiation	functional_ncRNA	51	2197	673	1433	1402	147	97	0.659864	-16.6	-10.4	8
ENSG00000278261	SNORD1A	expressed	host_expressed	72	4	C/D	rRNA	non_coding	True	dual_initiation	functional_ncRNA	5	1724	237	1415	1388	5	1	0.2	-22.1	-5.8	4
ENSG00000278274	SNORA61	expressed	host_expressed	130	0	H/ACA	rRNA	non_coding	True	simple_initiation	functional_ncRNA	4	328	20	178	139	5	2	0.4	-46.5	-5.3	4
ENSG00000278527	SNORD22	not_expressed	host_expressed	125	3	C/D	Orphan	non_coding	True	dual_initiation	functional_ncRNA	5	458	235	98	58	10	6	0.6	-32.9	-6.2	6
ENSG00000278715	SNORD116-20	expressed	host_expressed	92	2	C/D	rRNA	non_coding	False	simple_initiation	functional_ncRNA	43	2018	64	1862	1842	147	105	0.714286	-18.2	-12.7	11
ENSG00000280496	SNORA17B	expressed	host_expressed	136	0	H/ACA	Orphan	non_coding	True	dual_initiation	functional_ncRNA	3	1204	73	995	955	5	3	0.6	-50.8	-6.2	3
ENSG00000280636	AC096587.2	not_expressed	intergenic	138	6	H/ACA	Orphan	intergenic	intergenic	intergenic	intergenic									-42.2	-5.4	0
ENSG00000280704	SNORD3E	expressed	host_expressed	216	4	C/D	Orphan	protein_coding	False	simple_initiation	Other	8	19444	6740	12488	12457	30	23	0.766667	-67.7	-7.2	6
ENSG00000280894	SNORA50D	not_expressed	intergenic	132	0	H/ACA	Orphan	intergenic	intergenic	intergenic	intergenic									-50.9	-4.9	4
ENSG00000280904	AC104446.3	expressed	host_expressed	80	3	C/D	rRNA	protein_coding	True	dual_initiation	RNA binding, processing, splicing	5	885	691	114	88	14	10	0.714286	-21.2	-2	3
ENSG00000281710	U3	not_expressed	intergenic	216	4	C/D	snRNA	intergenic	intergenic	intergenic	intergenic									-69.9	-5.3	7
ENSG00000281859	SNORD38B	expressed	host_expressed	69	4	C/D	rRNA	protein_coding	True	dual_initiation	Ribosomal protein	5	450	262	119	97	5	1	0.2	-17.1	-22.2	15
ENSG00000281863	AC034186.2	not_expressed	intergenic	138	6	H/ACA	rRNA	intergenic	intergenic	intergenic	intergenic									-41.8	-9.2	7
ENSG00000281910	SNORA50A	expressed	host_expressed	136	0	H/ACA	Orphan	protein_coding	True	dual_initiation	RNA binding, processing, splicing	17	1541	282	1123	1088	49	33	0.673469	-37.3	-4.2	6
ENSG00000283551	SNORD98	expressed	host_expressed	67	4	C/D	rRNA	protein_coding	True	simple_initiation	RNA binding, processing, splicing	12	546	346	133	101	24	13	0.541667	-16	-11	9
ENSG00000283584	AC007222.1	not_expressed	host_expressed	80	7	C/D	Orphan	protein_coding	False	simple_initiation	RNA binding, processing, splicing	7	466052	379120	86852	86812	19	13	0.684211	-16.2	-3.4	8
ENSG00000283675	AC004448.4	not_expressed	host_not_expressed	64	7	C/D	Orphan	non_coding	False	simple_initiation	non_functional_ncRNA	1	4807	1100	3643	3619	1	1	1	-10.3	-5.7	4
ENSG00000288603	SNORA74C-2	expressed	host_expressed	201	6	H/ACA	rRNA	protein_coding	True	simple_initiation	Poorly characterized	5	2472	1682	589	557	7	3	0.428571	-74.3	-4.8	0
NR_000026	SNORD139	not_expressed	host_expressed	55	8	C/D	rRNA	protein_coding	True	simple_initiation	Ribosomal protein	3	623	566	2	0	9	7	0.777778	-11.2	-9.9	3
NR_002559	SNORD29	expressed	host_expressed	65	3	C/D	rRNA	non_coding	True	dual_initiation	functional_ncRNA	6	188	51	72	34	10	5	0.5	-6.9	-11.7	4
NR_002560	SNORD31	expressed	host_expressed	68	3	C/D	rRNA	non_coding	True	dual_initiation	functional_ncRNA	8	440	160	212	181	10	3	0.3	-17.6	-10	6
NR_002579	SNORD74	expressed	host_expressed	72	1	C/D	rRNA	non_coding	True	simple_initiation	functional_ncRNA	2	941	237	632	593	12	11	0.916667	-16.6	-18.9	12
NR_002743	SNORD50A	expressed	host_expressed	75	2	C/D	rRNA	non_coding	True	dual_initiation	functional_ncRNA	5	236	57	104	68	8	4	0.5	-9	-13	8
NR_002746	SNORD47	expressed	host_expressed	77	3	C/D	rRNA	non_coding	True	simple_initiation	functional_ncRNA	11	183	40	66	29	12	2	0.166667	-5.5	-9.1	7
NR_002750	SNORD44	expressed	host_expressed	61	2	C/D	rRNA	non_coding	True	simple_initiation	functional_ncRNA	6	286	150	75	33	12	7	0.583333	-6.6	-7.5	7
NR_003046	SNORD59B	expressed	host_expressed	75	3	C/D	rRNA	protein_coding	False	dual_initiation	Other	4	253	84	94	61	9	6	0.666667	-12.8	-8.2	8
NR_003066	SNORD103C	expressed	host_expressed	75	3	C/D	Orphan	protein_coding	True	dual_initiation	RNA binding, processing, splicing	11	1047	118	854	827	21	11	0.52381	-23.3	-14	14
NR_003200	SNORD114-8	not_expressed	host_expressed	71	4	C/D	rRNA	non_coding	False	simple_initiation	non_functional_ncRNA	24	2209	343	1795	1770	36	13	0.361111	-13.5	-3.4	3
NR_003684	SNORD119	expressed	host_expressed	96	2	C/D	rRNA	protein_coding	True	dual_initiation	RNA binding, processing, splicing	6	331	43	192	154	7	2	0.285714	-21.8	-3.7	3
NR_003938	SNORD81	expressed	host_expressed	77	1	C/D	rRNA	non_coding	True	simple_initiation	functional_ncRNA	12	185	36	72	37	12	1	0.0833333	-7.2	-10.7	4
NR_003939	SNORD79	expressed	host_expressed	81	2	C/D	rRNA	non_coding	True	simple_initiation	functional_ncRNA	8	231	81	69	28	12	5	0.416667	-12.5	-13.8	11
NR_003940	SNORD80	expressed	host_expressed	71	2	C/D	rRNA	non_coding	True	simple_initiation	functional_ncRNA	9	528	327	130	93	12	4	0.333333	-9.6	-12.5	8
NR_003941	SNORD75	expressed	host_expressed	60	5	C/D	rRNA	non_coding	True	simple_initiation	functional_ncRNA	3	198	54	84	53	12	10	0.833333	-15.6	-8.7	5
NR_003942	SNORD76	expressed	host_expressed	81	1	C/D	rRNA	non_coding	True	simple_initiation	functional_ncRNA	4	197	47	69	29	12	9	0.75	-11	-14.4	11
NR_003943	SNORD77	expressed	host_expressed	70	3	C/D	rRNA	non_coding	True	simple_initiation	functional_ncRNA	5	325	159	96	57	12	8	0.666667	-15.1	-6.6	6
NR_003944	SNORD78	expressed	host_expressed	65	3	C/D	rRNA	non_coding	True	simple_initiation	functional_ncRNA	7	313	172	76	39	12	6	0.5	-8.6	-15.9	11
NR_004054	SNORD103A	expressed	host_expressed	88	1	C/D	rRNA	protein_coding	True	dual_initiation	RNA binding, processing, splicing	21	3304	868	2348	2310	21	1	0.047619	-21.5	-13.3	6
NR_033295	SNORD103B	expressed	host_expressed	88	1	C/D	rRNA	protein_coding	True	dual_initiation	RNA binding, processing, splicing	17	4653	929	3636	3605	21	5	0.238095	-21.5	-13.3	6
NR_132752	SNORD128	expressed	host_expressed	114	4	C/D	Orphan	protein_coding	False	simple_initiation	Other	11	29043	151	28778	28738	23	13	0.565217	-33.1	-12.8	4
NR_132753	SNORD133	expressed	host_expressed	216	3	C/D	rRNA	protein_coding	True	simple_initiation	RNA binding, processing, splicing	10	6721	2155	4350	4327	15	6	0.4	-47.03	-11.3	4
NR_132755	SNORD134	expressed	host_expressed	181	3	C/D	rRNA	protein_coding	False	dual_initiation	Other	11	652	236	235	199	42	32	0.761905	-79	-20.6	10
NR_132756	SNORD135	expressed	host_expressed	75	4	C/D	rRNA	protein_coding	True	dual_initiation	Other	19	191	44	72	34	25	7	0.28	-17.7	-19.2	9
NR_132758	SNORD142	expressed	host_expressed	195	1	C/D	Orphan	protein_coding	True	simple_initiation	Other	21	1172	791	186	164	23	3	0.130435	-48.1	-9.9	5
NR_132759	SNORD143	expressed	host_expressed	76	4	C/D	rRNA	protein_coding	True	simple_initiation	Other	3	17779	3786	13917	13876	28	26	0.928571	-19.1	-5.2	5
NR_132760	SNORD144	expressed	host_expressed	86	4	C/D	rRNA	protein_coding	True	simple_initiation	Other	3	17779	1489	16204	16163	28	26	0.928571	-19	-3.5	9
NR_132768	SNORA86	not_expressed	host_expressed	139	6	H/ACA	Orphan	protein_coding	True	simple_initiation	Other	0	0	0	0	0	15	0	0	-30.4	-3.6	1
NR_132769	SNORA87	expressed	host_expressed	222	6	H/ACA	rRNA	protein_coding	True	dual_initiation	Other	4	101061	5230	95609	95578	14	11	0.785714	-97.7	-6.6	4
NR_132770	SNORA88	expressed	host_not_expressed	171	6	H/ACA	Orphan	non_coding	False	simple_initiation	non_functional_ncRNA	2	117695	86209	31315	31276	2	1	0.5	-54.2	-4.6	2
NR_132771	SNORA89	not_expressed	host_expressed	177	6	H/ACA	Orphan	protein_coding	False	simple_initiation	Poorly characterized	6	58832	32553	26102	26069	11	6	0.545455	-37.8	-5.5	3
NR_132772	SNORA90	not_expressed	intergenic	175	6	H/ACA	Orphan	intergenic	intergenic	intergenic	intergenic									-18.8	-1	3
NR_132773	SNORA91	not_expressed	host_expressed	178	6	H/ACA	Orphan	protein_coding	False	simple_initiation	Poorly characterized	1	11128	5089	5861	5819	13	13	1	-63.2	-9	5
NR_132774	SNORA92	not_expressed	host_expressed	242	6	H/ACA	snRNA	protein_coding	False	dual_initiation	Poorly characterized	9	3078	66	2770	2737	9	1	0.111111	-85.1	-5.9	4
NR_132775	SNORA93	not_expressed	host_expressed	168	6	H/ACA	rRNA	protein_coding	False	simple_initiation	Poorly characterized	6	622	97	357	329	17	12	0.705882	-57.8	-11.2	8
NR_132776	SNORA94	expressed	host_expressed	231	6	H/ACA	snRNA	protein_coding	False	simple_initiation	Other	3	993	621	141	106	12	10	0.833333	-73	-6.2	8
NR_132777	SNORA95	not_expressed	intergenic	112	6	H/ACA	Orphan	intergenic	intergenic	intergenic	intergenic									-12.3	-5.3	6
NR_132778	SNORA98	not_expressed	host_expressed	113	6	H/ACA	Orphan	protein_coding	False	simple_initiation	Poorly characterized	2	18697	2472	16112	16084	73	72	0.986301	-25.8	-2.1	5
NR_132779	SNORA99	not_expressed	host_expressed	197	6	H/ACA	rRNA	protein_coding	False	simple_initiation	Other	1	3555	1059	2299	2268	6	6	1	-71.2	-5.7	5
NR_132782	SNORA100	not_expressed	host_expressed	131	6	H/ACA	rRNA	protein_coding	True	dual_initiation	RNA binding, processing, splicing	13	6120	757	5232	5193	16	4	0.25	-19.6	-2.2	4
NR_132783	SNORA103	not_expressed	host_expressed	86	6	H/ACA	Orphan	non_coding	True	simple_initiation	functional_ncRNA	0	325	239	0	0	12	0	0	-13.6	-4.6	6
NR_132784	SNORA104	expressed	intergenic	139	6	H/ACA	Orphan	intergenic	intergenic	intergenic	intergenic									-39.1	-3.8	5
NR_132787	SNORA105A	not_expressed	intergenic	116	6	H/ACA	Orphan	intergenic	intergenic	intergenic	intergenic									-17.1	-7.9	10
NR_132788	SNORA105B	not_expressed	host_expressed	116	6	H/ACA	snRNA	protein_coding	True	simple_initiation	RNA binding, processing, splicing	0	0	0	0	0	11	0	0	-17.1	-9.3	7
NR_132789	SNORA105C	not_expressed	intergenic	116	9	H/ACA	Orphan	intergenic	intergenic	intergenic	intergenic									-10.8	-7.9	10
NR_132852	SNORA107	not_expressed	intergenic	125	0	H/ACA	Orphan	intergenic	intergenic	intergenic	intergenic									-24.2	-2.6	5
NR_132964	SNORA109	not_expressed	intergenic	128	0	H/ACA	Orphan	intergenic	intergenic	intergenic	intergenic									-17.2	-4.5	0
NR_132966	SNORA110	not_expressed	host_expressed	216	9	H/ACA	rRNA	protein_coding	True	simple_initiation	RNA binding, processing, splicing	7	36800	32277	4307	4268	9	3	0.333333	-85.7	-9.3	2
NR_132967	SNORA111	not_expressed	host_expressed	166	6	H/ACA	rRNA	protein_coding	False	simple_initiation	RNA binding, processing, splicing	2	163647	19022	144459	144425	12	11	0.916667	-37.1	-5.8	6
NR_132972	SNORD129	expressed	host_expressed	105	5	C/D	Orphan	protein_coding	False	simple_initiation	Other	16	12462	1841	10516	10496	20	5	0.25	-24.8	-9.8	9
NR_132973	SNORD130	not_expressed	host_expressed	142	4	C/D	rRNA	protein_coding	False	simple_initiation	Other	14	19822	16294	3386	3351	18	5	0.277778	-28.9	-7.3	9
NR_132974	SNORD131	not_expressed	host_expressed	146	5	C/D	rRNA	protein_coding	True	dual_initiation	Ribosomal protein	1	3523	1953	1424	1398	5	5	1	-61.8	-15.7	12
NR_132975	SNORD132	not_expressed	host_expressed	100	5	C/D	snRNA	protein_coding	False	dual_initiation	Other	13	768	162	506	473	24	12	0.5	-9	-8.6	6
NR_132976	SNORD137	not_expressed	host_not_expressed	79	6	C/D	snRNA	non_coding	False	simple_initiation	non_functional_ncRNA	4	41021	30803	10139	10106	5	2	0.4	-10.4	-6.4	4
NR_132979	SNORD140	not_expressed	intergenic	120	4	C/D	Orphan	intergenic	intergenic	intergenic	intergenic									-31.7	-5.7	11
NR_132980	SNORD141A	not_expressed	host_expressed	105	5	C/D	Orphan	non_coding	False	simple_initiation	non_functional_ncRNA	0	0	0	0	0	0	0		-30.1	-7	6
NR_132981	SNORD141B	not_expressed	host_expressed	105	5	C/D	Orphan	non_coding	False	simple_initiation	non_functional_ncRNA	0	0	0	0	0	0	0		-30.1	-7	7
NR_135619	SNORA101A	not_expressed	intergenic	121	6	H/ACA	Orphan	intergenic	intergenic	intergenic	intergenic									-16.4	-2.8	6
NR_135620	SNORA101B	expressed	host_expressed	132	0	H/ACA	Orphan	protein_coding	True	dual_initiation	Other	4	8192	8012	48	14	41	38	0.926829	-32.7	-2.1	4
NR_145733	SNORD13G	not_expressed	intergenic	105	4	C/D	Orphan	intergenic	intergenic	intergenic	intergenic									-20.7	0	0
NR_145737	SNORD3F	not_expressed	intergenic	98	6	C/D	snRNA	intergenic	intergenic	intergenic	intergenic									-16.4	-0.1	2
NR_145738	SNORD13F	not_expressed	host_expressed	85	5	C/D	Orphan	protein_coding	False	dual_initiation	RNA binding, processing, splicing	3	1975	41	1849	1828	21	19	0.904762	-20.6	-6	6
NR_145745	SNORD13C	not_expressed	host_expressed	104	5	C/D	Orphan	protein_coding	False	simple_initiation	Other	4	523	57	362	335	11	8	0.727273	-25.9	-3.3	4
NR_145747	SNORD13I	not_expressed	host_expressed	105	7	C/D	Orphan	protein_coding	False	simple_initiation	Poorly characterized	7	2946	1015	1826	1801	23	17	0.73913	-21.4	-0.6	2
NR_145753	SNORD13H	not_expressed	host_expressed	104	9	C/D	Orphan	protein_coding	False	simple_initiation	Other	5	3871	2401	1366	1341	5	1	0.2	-20.5	-6.5	5
NR_145754	SNORD3K	not_expressed	intergenic	100	7	C/D	Orphan	intergenic	intergenic	intergenic	intergenic									-25.4	-3.6	4
NR_145756	SNORD13B-2	not_expressed	intergenic	104	4	C/D	Orphan	intergenic	intergenic	intergenic	intergenic									-23.6	-5.6	5
NR_145772	SNORD3I	not_expressed	intergenic	92	7	C/D	Orphan	intergenic	intergenic	intergenic	intergenic									-16	-2	4
NR_145779	SNORD155	not_expressed	host_expressed	61	5	C/D	Orphan	protein_coding	False	simple_initiation	Other	3	166901	114390	52450	52409	8	6	0.75	-5.7	-16	13
NR_145780	SNORD159	expressed	host_expressed	70	8	C/D	Orphan	protein_coding	False	simple_initiation	Other	20	2535	333	2132	2088	22	3	0.136364	-21.9	-15	5
NR_145781	SNORD157	expressed	host_expressed	68	4	C/D	Orphan	protein_coding	False	dual_initiation	Other	4	2302	1405	829	788	4	1	0.25	-19.5	-14.9	12
NR_145782	SNORD161	not_expressed	host_expressed	66	9	C/D	Orphan	protein_coding	False	dual_initiation	Poorly characterized	14	21530	2447	19017	18993	73	60	0.821918	-11	-9.5	10
NR_145783	SNORD162	expressed	host_expressed	98	3	C/D	Orphan	non_coding	False	simple_initiation	non_functional_ncRNA	4	56134	14785	41251	41228	5	2	0.4	-41.5	-14.8	11
NR_145784	SNORA118	not_expressed	host_expressed	131	6	H/ACA	rRNA	protein_coding	False	simple_initiation	Other	1	25789	16362	9296	9267	39	39	1	-46.2	-11.6	9
NR_145785	SNORD149	not_expressed	host_expressed	64	8	C/D	Orphan	protein_coding	False	dual_initiation	RNA binding, processing, splicing	4	32164	1499	30601	30562	11	8	0.727273	-17.8	-15.9	8
NR_145786	SNORD169	expressed	host_expressed	64	9	C/D	Orphan	protein_coding	False	dual_initiation	Other	5	14455	169	14222	14199	11	7	0.636364	-18.4	-12.2	2
NR_145787	SNORD163	not_expressed	host_expressed	64	5	C/D	Orphan	protein_coding	True	simple_initiation	Other	7	1344	144	1136	1102	45	39	0.866667	-9.2	-3.6	9
NR_145788	SNORD156	not_expressed	host_expressed	74	2	C/D	Orphan	protein_coding	False	simple_initiation	Poorly characterized	37	1669	1310	285	252	66	30	0.454545	-15.8	-9.8	9
NR_145789	SNORA112	expressed	host_expressed	124	0	H/ACA	Orphan	non_coding	False	simple_initiation	non_functional_ncRNA	1	28929	5661	23144	23118	3	3	1	-43.3	-8.6	8
NR_145790	SNORD153	expressed	host_expressed	76	4	C/D	Orphan	protein_coding	True	simple_initiation	Other	1	2709	1927	706	666	1	1	1	-19.1	-12.9	11
NR_145791	SNORD146	not_expressed	host_expressed	130	11	C/D	Orphan	protein_coding	True	simple_initiation	Other	20	882	641	111	81	27	8	0.296296	-28.7	-5.3	5
NR_145792	SNORA115	not_expressed	host_expressed	144	6	H/ACA	Orphan	protein_coding	False	simple_initiation	Other	19	3547	1359	2044	2016	32	14	0.4375	-58.3	-2.6	3
NR_145793	SNORD160	expressed	host_expressed	73	8	C/D	rRNA	protein_coding	True	simple_initiation	Other	17	366	53	240	220	20	4	0.2	-29	-9.2	4
NR_145794	SNORD164	expressed	host_expressed	61	5	C/D	Orphan	protein_coding	False	simple_initiation	Other	1	37208	23581	13566	13544	17	17	1	-15.2	-10	7
NR_145795	SNORD173	not_expressed	host_expressed	104	2	C/D	rRNA	protein_coding	False	simple_initiation	Other	3	18309	8695	9510	9486	7	5	0.714286	-31.6	-5.5	7
NR_145796	SNORD166	expressed	host_expressed	106	2	C/D	Orphan	protein_coding	False	simple_initiation	Other	1	84603	25740	58757	58724	5	5	1	-30.3	-11.4	14
NR_145797	SNORA114	not_expressed	host_not_expressed	141	6	H/ACA	Orphan	protein_coding	False	simple_initiation	Other	11	79817	60101	19575	19544	18	8	0.444444	-54.2	-7.4	5
NR_145798	SNORA116	not_expressed	host_expressed	147	6	H/ACA	Orphan	protein_coding	False	simple_initiation	Poorly characterized	1	98800	8715	89938	89914	13	13	1	-54.3	-5.6	4
NR_145799	SNORD168	not_expressed	host_expressed	58	6	C/D	Orphan	protein_coding	False	simple_initiation	Other	1	272887	189173	83656	83624	10	10	1	-13	-16.8	14
NR_145800	SNORD152	not_expressed	host_expressed	54	8	C/D	Orphan	protein_coding	False	simple_initiation	Other	14	2111	726	1331	1309	21	8	0.380952	-18.6	-15.1	9
NR_145802	SNORD138	not_expressed	host_expressed	63	3	C/D	rRNA	protein_coding	False	dual_initiation	Other	3	793	629	101	80	3	1	0.333333	-13.4	-7.1	5
NR_145803	SNORA113	not_expressed	host_expressed	154	0	H/ACA	Orphan	protein_coding	True	simple_initiation	Other	1	60338	44911	15273	15251	8	8	1	-52.3	-1.2	3
NR_145804	SNORD165	not_expressed	host_expressed	63	6	C/D	Orphan	protein_coding	False	simple_initiation	Other	2	41003	40156	784	752	14	13	0.928571	-15.8	-15.1	8
NR_145805	SNORD175	not_expressed	host_expressed	72	3	C/D	Orphan	protein_coding	True	simple_initiation	RNA binding, processing, splicing	14	2014	1478	464	438	30	17	0.566667	-14.2	-10.3	10
NR_145806	SNORD167	not_expressed	host_expressed	84	5	C/D	Orphan	protein_coding	False	simple_initiation	Other	1	3629	2958	587	548	23	23	1	-31.5	-12.8	4
NR_145807	SNORA119	not_expressed	host_expressed	144	6	H/ACA	Orphan	protein_coding	False	simple_initiation	Poorly characterized	3	3918	3050	724	700	13	11	0.846154	-53.9	-9.5	5
NR_145809	SNORD150	expressed	host_not_expressed	75	5	C/D	Orphan	protein_coding	False	simple_initiation	Poorly characterized	7	261	70	116	72	7	1	0.142857	-23.2	-9.3	7
NR_145810	SNORD147	not_expressed	host_expressed	85	7	C/D	Orphan	protein_coding	False	simple_initiation	Other	3	142810	87968	54757	54720	26	24	0.923077	-41.8	-9.3	5
NR_145811	SNORD158	not_expressed	host_expressed	58	5	C/D	Orphan	protein_coding	False	simple_initiation	Other	5	86077	16843	69176	69143	10	6	0.6	-9.3	-8.9	13
NR_145812	SNORD172	not_expressed	host_expressed	59	6	C/D	Orphan	protein_coding	False	simple_initiation	Other	15	599	449	91	60	17	3	0.176471	-19.3	-6	4
NR_145813	SNORD151	not_expressed	host_expressed	84	3	C/D	Orphan	protein_coding	False	simple_initiation	Poorly characterized	4	39051	16301	22666	22626	30	27	0.9	-15.3	-6.4	6
NR_145814	SNORD154	not_expressed	intergenic	52	5	C/D	Orphan	intergenic	intergenic	intergenic	intergenic									-11.6	-11.1	8
NR_145815	SNORD170	not_expressed	host_expressed	85	4	C/D	Orphan	protein_coding	False	simple_initiation	Other	36	2623	1059	1479	1449	56	21	0.375	-37.3	-12.9	7
NR_145816	SNORD145	expressed	host_expressed	100	6	C/D	Orphan	protein_coding	False	simple_initiation	Poorly characterized	1	14039	3276	10663	10623	4	4	1	-43.7	-5.8	3
NR_145839	SNORA117	not_expressed	host_expressed	98	6	H/ACA	Orphan	protein_coding	False	dual_initiation	Poorly characterized	15	8549	8058	393	359	15	1	0.0666667	-34.4	-10.8	7
NR_145840	SNORD148	not_expressed	intergenic	54	17	C/D	Orphan	intergenic	intergenic	intergenic	intergenic									-7.2	-5.3	4
NR_145983	SNORD3P3	not_expressed	intergenic	130	7	C/D	Orphan	intergenic	intergenic	intergenic	intergenic									-32.1	-1.8	3
NR_145987	SNORD13B-1	not_expressed	intergenic	104	4	C/D	Orphan	intergenic	intergenic	intergenic	intergenic									-23.6	-5.4	0
NR_145989	SNORA120	not_expressed	host_expressed	147	0	H/ACA	Orphan	protein_coding	False	simple_initiation	Other	18	7803	4109	3547	3511	51	34	0.666667	-47.3	-3.9	3
cluster_109	refurbishment4	expressed	host_expressed	139	6	H/ACA	Orphan	protein_coding	False	simple_initiation	Poorly characterized	4	40688	2701	37848	37810	9	6	0.666667	-56.8	-5.2	4
cluster_111	password9	not_expressed	host_not_expressed	117	6	H/ACA	Orphan	non_coding	False	simple_initiation	non_functional_ncRNA	3	105652	57435	48100	48058	5	3	0.6	-40.9	-6.9	6
cluster_1120	mug7	expressed	host_expressed	152	9	H/ACA	Orphan	protein_coding	False	dual_initiation	Other	3	6423	4418	1853	1830	7	5	0.714286	-57.8	-8.8	0
cluster_1124	home2	not_expressed	host_expressed	116	0	H/ACA	Orphan	protein_coding	True	simple_initiation	Other	1	8616	6061	2439	2399	6	6	1	-38.3	-11.6	6
cluster_170	inlets8	not_expressed	host_expressed	116	6	H/ACA	Orphan	protein_coding	True	simple_initiation	Other	3	47645	22188	25341	25318	13	11	0.846154	-43.2	-12.3	0
cluster_25	aluminum8	expressed	host_expressed	149	0	H/ACA	Orphan	protein_coding	False	simple_initiation	Other	29	20033	7716	12168	12142	43	15	0.348837	-56.4	-4.4	0
cluster_290	brothers1	not_expressed	host_expressed	157	6	H/ACA	Orphan	protein_coding	True	simple_initiation	Other	18	16545	11056	5332	5308	18	1	0.0555556	-44.2	-3.1	0
cluster_32	firer2	expressed	host_expressed	113	6	H/ACA	Orphan	protein_coding	False	dual_initiation	Other	8	18181	8262	9806	9783	21	14	0.666667	-38.3	-6.3	7
cluster_390	leaper2	expressed	host_expressed	111	0	H/ACA	Orphan	protein_coding	False	simple_initiation	Other	3	32182	13366	18705	18666	17	15	0.882353	-44.4	-8	7
cluster_428	echoes7	expressed	host_expressed	116	0	H/ACA	Orphan	protein_coding	True	simple_initiation	Other	11	27259	8926	18217	18186	13	3	0.230769	-49.4	-14	11
cluster_510	battleships8	expressed	host_expressed	152	9	H/ACA	Orphan	protein_coding	True	simple_initiation	Other	3	9555	1643	7760	7723	3	1	0.333333	-51	-6.9	5
cluster_545	punches5	expressed	host_expressed	144	3	C/D	Orphan	protein_coding	True	dual_initiation	RNA binding, processing, splicing	12	1337	182	1011	981	15	4	0.266667	-59.4	-11.4	0
cluster_561	makeup3	expressed	host_expressed	146	6	H/ACA	Orphan	protein_coding	False	simple_initiation	Other	1	22030	4122	17762	17738	10	10	1	-60.3	-10.9	9
cluster_565	tips7	not_expressed	host_expressed	116	6	H/ACA	Orphan	protein_coding	True	dual_initiation	Other	7	7017	1398	5503	5476	20	14	0.7	-38.4	-9.1	5
cluster_584	food6	not_expressed	host_expressed	115	0	H/ACA	Orphan	protein_coding	True	dual_initiation	Other	17	2989	815	2059	2021	22	6	0.272727	-43.1	-13.6	8
cluster_588	implantations8	not_expressed	host_expressed	139	3	C/D	Orphan	protein_coding	True	dual_initiation	Other	3	2885	2265	481	439	12	10	0.833333	-58.6	-21.1	11
cluster_593	outlet1	not_expressed	host_not_expressed	116	0	H/ACA	Orphan	protein_coding	False	simple_initiation	Poorly characterized	3	9503	2992	6395	6357	3	1	0.333333	-41.4	-7.8	5
cluster_672	mixture1	expressed	host_expressed	135	6	H/ACA	Orphan	protein_coding	False	simple_initiation	Other	1	71515	25019	46361	46331	2	2	1	-54.1	-13.7	8
cluster_692	standardization9	expressed	host_expressed	153	9	H/ACA	Orphan	protein_coding	True	simple_initiation	Other	6	23862	17903	5806	5777	37	32	0.864865	-68.5	-9.4	0
cluster_701	chief7	not_expressed	host_expressed	135	0	H/ACA	Orphan	protein_coding	False	dual_initiation	Other	5	2897	2262	500	462	15	11	0.733333	-54.7	-2.6	2
cluster_72	seeds1	expressed	host_expressed	142	6	H/ACA	Orphan	protein_coding	False	simple_initiation	Other	3	41009	2702	38165	38141	21	19	0.904762	-56.4	-5.2	4
cluster_818	doors7	not_expressed	host_expressed	117	6	H/ACA	Orphan	protein_coding	True	simple_initiation	Other	4	7238	3451	3670	3636	10	7	0.7	-43.1	-9.2	0
cluster_837	conversion3	not_expressed	host_expressed	139	2	C/D	Orphan	protein_coding	False	simple_initiation	Other	7	5935	5539	257	230	9	3	0.333333	-32	-10.8	5
cluster_852	update4	expressed	host_expressed	116	3	H/ACA	Orphan	protein_coding	True	simple_initiation	Other	2	10000	8226	1658	1620	7	6	0.857143	-31.9	-5.6	4
cluster_983	profession6	expressed	host_expressed	115	6	H/ACA	Orphan	protein_coding	False	dual_initiation	Other	3	118930	89537	29278	29255	6	4	0.666667	-48.2	-5.9	0
snoDB1003	snoU13	not_expressed	host_expressed	103	10	C/D	Orphan	protein_coding	False	simple_initiation	Poorly characterized	1	38530	6263	32164	32121	4	4	1	-23.6	-7.5	9
snoDB1008	snoU13	not_expressed	intergenic	104	5	C/D	Orphan	intergenic	intergenic	intergenic	intergenic									-16.6	-0.9	3
snoDB1009	snoU13	not_expressed	intergenic	104	4	C/D	Orphan	intergenic	intergenic	intergenic	intergenic									-18.3	-9.1	7
snoDB1010	snoU13	not_expressed	intergenic	96	7	C/D	Orphan	intergenic	intergenic	intergenic	intergenic									-23.4	-4.6	6
snoDB1016	snoU13	not_expressed	host_not_expressed	104	6	C/D	Orphan	protein_coding	False	dual_initiation	Other	2	21158	2275	18779	18747	6	5	0.833333	-25.6	-5.5	5
snoDB1017	snoU13	not_expressed	intergenic	104	9	C/D	Orphan	intergenic	intergenic	intergenic	intergenic									-18.7	-4.5	5
snoDB1018	snoU13	not_expressed	intergenic	107	5	C/D	Orphan	intergenic	intergenic	intergenic	intergenic									-23.7	-5.6	8
snoDB1019	snoU13	not_expressed	intergenic	101	6	C/D	Orphan	intergenic	intergenic	intergenic	intergenic									-17.8	-4.9	8
snoDB1020	snoU13	not_expressed	intergenic	99	7	C/D	rRNA	intergenic	intergenic	intergenic	intergenic									-20	-2.4	2
snoDB1021	snoU13	not_expressed	host_not_expressed	104	6	C/D	Orphan	non_coding	False	simple_initiation	non_functional_ncRNA	1	49900	40998	8798	8769	2	2	1	-15.3	-4.4	5
snoDB1022	snoU13	not_expressed	intergenic	104	8	C/D	Orphan	intergenic	intergenic	intergenic	intergenic									-18.7	-4.1	4
snoDB1027	snoU13	not_expressed	host_expressed	103	6	C/D	Orphan	protein_coding	False	simple_initiation	Other	4	9145	6521	2521	2487	4	1	0.25	-18	-4.5	4
snoDB1028	snoU13	not_expressed	intergenic	104	6	C/D	Orphan	intergenic	intergenic	intergenic	intergenic									-21.2	-6.2	10
snoDB1029	snoU13	not_expressed	host_not_expressed	103	6	C/D	Orphan	non_coding	False	simple_initiation	non_functional_ncRNA	1	116442	6013	110326	110294	3	3	1	-21.6	-3.9	5
snoDB1032	U3	not_expressed	host_not_expressed	74	13	C/D	rRNA	non_coding	False	simple_initiation	non_functional_ncRNA	2	13508	7701	5733	5707	2	1	0.5	-21.1	-3.7	9
snoDB1038	snoU13	not_expressed	intergenic	105	5	C/D	Orphan	intergenic	intergenic	intergenic	intergenic									-14.6	-2.1	4
snoDB1039	snoU13	not_expressed	host_expressed	96	5	C/D	Orphan	protein_coding	True	simple_initiation	Other	4	3509	3178	235	204	25	22	0.88	-20.9	-2	3
snoDB1040	snoU13	not_expressed	intergenic	125	6	C/D	Orphan	intergenic	intergenic	intergenic	intergenic									-27.9	-2.7	5
snoDB1041	snoU13	not_expressed	intergenic	104	6	C/D	Orphan	intergenic	intergenic	intergenic	intergenic									-14	-5.8	0
snoDB1046	snoU13	not_expressed	host_expressed	104	6	C/D	Orphan	protein_coding	True	simple_initiation	Other	5	7883	3490	4289	4251	19	15	0.789474	-23.6	-0.9	5
snoDB1048	snoU13	not_expressed	intergenic	104	5	C/D	Orphan	intergenic	intergenic	intergenic	intergenic									-19	-5.3	9
snoDB1049	snoU13	not_expressed	host_not_expressed	102	9	C/D	Orphan	non_coding	False	simple_initiation	non_functional_ncRNA	2	28319	14071	14146	14121	7	6	0.857143	-23.3	-1.6	0
snoDB1058	snoU13	not_expressed	host_expressed	103	10	C/D	Orphan	protein_coding	True	simple_initiation	Other	2	18871	1619	17149	17126	7	6	0.857143	-22.5	-5.8	7
snoDB1063	snoU13	not_expressed	host_expressed	109	10	C/D	Orphan	protein_coding	False	simple_initiation	Other	10	8637	1506	7022	6994	20	11	0.55	-25.3	-1.8	2
snoDB1064	snoU13	not_expressed	intergenic	104	6	C/D	Orphan	intergenic	intergenic	intergenic	intergenic									-20.1	-1.4	2
snoDB1065	snoU13	not_expressed	host_expressed	97	6	C/D	Orphan	protein_coding	False	dual_initiation	Other	4	30466	27165	3204	3168	10	7	0.7	-21.7	-3.4	4
snoDB1069	snoU13	not_expressed	intergenic	103	5	C/D	rRNA	intergenic	intergenic	intergenic	intergenic									-17.1	-4.4	4
snoDB1073	SNORA51	not_expressed	intergenic	172	0	H/ACA	rRNA	intergenic	intergenic	intergenic	intergenic									-52.7	-7.8	6
snoDB1074	snoU13	not_expressed	intergenic	101	11	C/D	Orphan	intergenic	intergenic	intergenic	intergenic									-25.6	-3.1	7
snoDB1086	snoU13	not_expressed	host_expressed	111	5	C/D	Orphan	protein_coding	False	simple_initiation	Poorly characterized	2	59968	7164	52693	52667	22	21	0.954545	-25.5	0	0
snoDB1087	snoU13	not_expressed	host_expressed	103	10	C/D	Orphan	protein_coding	False	dual_initiation	Ribosome biogenesis & translation	4	4639	1439	3097	3075	38	35	0.921053	-18.2	-2.9	5
snoDB1088	snoU13	not_expressed	host_expressed	103	6	C/D	Orphan	protein_coding	False	simple_initiation	Poorly characterized	1	13638	4858	8677	8633	16	16	1	-19.8	-3.1	5
snoDB1093	snoU13	not_expressed	host_expressed	100	7	C/D	Orphan	protein_coding	False	simple_initiation	Other	30	1925	446	1379	1352	65	36	0.553846	-17.7	-6.9	8
snoDB1094	snoU13	not_expressed	intergenic	105	5	C/D	Orphan	intergenic	intergenic	intergenic	intergenic									-17.1	-5	7
snoDB1100	snoU13	not_expressed	intergenic	86	4	C/D	Orphan	intergenic	intergenic	intergenic	intergenic									-14.8	-2.5	5
snoDB1101	snoU13	not_expressed	intergenic	104	6	C/D	Orphan	intergenic	intergenic	intergenic	intergenic									-25.9	-3.2	6
snoDB1104	snoU13	not_expressed	host_expressed	101	4	C/D	Orphan	protein_coding	False	simple_initiation	Poorly characterized	2	68237	57032	11104	11077	9	8	0.888889	-20.4	-2.9	1
snoDB1105	snoU13	not_expressed	host_expressed	140	7	C/D	Orphan	protein_coding	False	dual_initiation	Other	2	4312	706	3466	3445	14	13	0.928571	-24.8	-2.7	5
snoDB1111	snoU13	not_expressed	intergenic	102	5	C/D	Orphan	intergenic	intergenic	intergenic	intergenic									-19.1	-1.2	6
snoDB1112	snoU13	not_expressed	intergenic	98	7	C/D	Orphan	intergenic	intergenic	intergenic	intergenic									-23.4	-8.7	5
snoDB1121	snoU13	not_expressed	intergenic	100	7	C/D	Orphan	intergenic	intergenic	intergenic	intergenic									-21.7	-9.4	10
snoDB1122	SNORA36C	not_expressed	host_expressed	137	0	H/ACA	rRNA	protein_coding	False	simple_initiation	Other	2	83464	71318	12009	11969	4	3	0.75	-33.8	-2.5	1
snoDB1124	snoU13	not_expressed	host_not_expressed	115	5	C/D	Orphan	protein_coding	False	simple_initiation	Poorly characterized	1	147248	130922	16211	16167	8	8	1	-26.9	-0.8	3
snoDB1125	snoU13	not_expressed	intergenic	104	5	C/D	Orphan	intergenic	intergenic	intergenic	intergenic									-24.4	-5.5	5
snoDB1128	snoU13	not_expressed	host_expressed	107	9	C/D	Orphan	protein_coding	True	simple_initiation	Ribosome biogenesis & translation	28	31744	29646	1991	1955	57	30	0.526316	-23	-7.7	6
snoDB1132	snoU13	not_expressed	intergenic	103	5	C/D	Orphan	intergenic	intergenic	intergenic	intergenic									-21.3	-1.8	4
snoDB1133	snoU13	not_expressed	host_expressed	101	5	C/D	Orphan	protein_coding	False	simple_initiation	Other	4	5818	4590	1127	1100	14	11	0.785714	-18.6	-4.8	7
snoDB1134	snoU13	not_expressed	intergenic	113	11	C/D	rRNA	intergenic	intergenic	intergenic	intergenic									-26	-8	4
snoDB1135	snoU13	not_expressed	host_expressed	101	7	C/D	Orphan	non_coding	False	simple_initiation	non_functional_ncRNA	4	110704	108296	2307	2289	6	3	0.5	-22.4	-1.9	4
snoDB1136	snoU13	not_expressed	intergenic	102	7	C/D	Orphan	intergenic	intergenic	intergenic	intergenic									-13.5	-2.5	3
snoDB1143	snoU13	not_expressed	intergenic	107	11	C/D	Orphan	intergenic	intergenic	intergenic	intergenic									-17.9	-1.8	3
snoDB1146	snoU13	not_expressed	intergenic	104	6	C/D	Orphan	intergenic	intergenic	intergenic	intergenic									-12	-2.5	3
snoDB1147	snoU13	not_expressed	intergenic	99	10	C/D	Orphan	intergenic	intergenic	intergenic	intergenic									-28.1	-3.4	4
snoDB1148	snoU13	not_expressed	intergenic	103	6	C/D	Orphan	intergenic	intergenic	intergenic	intergenic									-19.5	-5.2	5
snoDB1151	snoU13	not_expressed	intergenic	104	11	C/D	Orphan	intergenic	intergenic	intergenic	intergenic									-18.2	-1.1	0
snoDB1152	snoU13	not_expressed	host_expressed	103	7	C/D	Orphan	protein_coding	False	dual_initiation	Other	1	52846	16308	36435	36400	13	13	1	-22.4	-1.4	4
snoDB1153	snoU13	not_expressed	intergenic	101	5	C/D	Orphan	intergenic	intergenic	intergenic	intergenic									-19.5	-3.5	4
snoDB1159	snoU13	not_expressed	intergenic	104	9	C/D	Orphan	intergenic	intergenic	intergenic	intergenic									-17.6	-1.1	3
snoDB1160	snoU13	not_expressed	host_expressed	104	7	C/D	Orphan	non_coding	False	simple_initiation	non_functional_ncRNA	3	99734	10314	89316	89285	3	1	0.333333	-23.3	-6.1	5
snoDB1161	snoU13	not_expressed	intergenic	104	6	C/D	Orphan	intergenic	intergenic	intergenic	intergenic									-20.2	-4.7	8
snoDB1162	snoU13	not_expressed	host_expressed	104	5	C/D	Orphan	protein_coding	True	dual_initiation	Other	1	32988	21769	11115	11079	41	41	1	-18.7	-3.9	8
snoDB1165	snoU13	not_expressed	intergenic	104	6	C/D	Orphan	intergenic	intergenic	intergenic	intergenic									-20.7	-3.4	2
snoDB1168	snoU13	not_expressed	host_expressed	90	6	C/D	Orphan	protein_coding	False	simple_initiation	Other	4	523676	377882	145704	145670	6	3	0.5	-18.7	-5	7
snoDB1175	snoU13	not_expressed	intergenic	98	6	C/D	Orphan	intergenic	intergenic	intergenic	intergenic									-21.4	-4.3	8
snoDB1179	snoU13	not_expressed	intergenic	107	10	C/D	Orphan	intergenic	intergenic	intergenic	intergenic									-20	-5.4	5
snoDB1180	snoU13	not_expressed	host_not_expressed	104	6	C/D	Orphan	non_coding	False	simple_initiation	non_functional_ncRNA	1	37640	3610	33926	33894	1	1	1	-22	-2.9	4
snoDB1183	snoU13	not_expressed	host_expressed	104	11	C/D	Orphan	protein_coding	True	dual_initiation	Other	2	24464	17360	7000	6970	11	10	0.909091	-25.8	-1.2	0
snoDB1184	snoU13	not_expressed	intergenic	104	6	C/D	Orphan	intergenic	intergenic	intergenic	intergenic									-22.2	-5.3	3
snoDB1188	snoU13	not_expressed	intergenic	96	7	C/D	Orphan	intergenic	intergenic	intergenic	intergenic									-22.5	-6.3	7
snoDB1205	snoU13	not_expressed	intergenic	96	3	C/D	Orphan	intergenic	intergenic	intergenic	intergenic									-25	-3.5	3
snoDB1206	snoU13	not_expressed	intergenic	101	10	C/D	Orphan	intergenic	intergenic	intergenic	intergenic									-17.3	-6	7
snoDB1210	snoU13	not_expressed	host_expressed	101	6	C/D	Orphan	protein_coding	True	simple_initiation	Other	8	998	674	223	199	12	5	0.416667	-24.2	-5.4	5
snoDB1211	snoU13	not_expressed	host_expressed	98	5	C/D	Orphan	protein_coding	False	simple_initiation	Other	10	10893	5165	5630	5606	32	23	0.71875	-21	-3.4	6
snoDB1213	snoU13	not_expressed	host_expressed	100	2	C/D	Orphan	protein_coding	False	dual_initiation	Other	1	5280	4862	318	299	15	15	1	-21.9	-4	4
snoDB1214	snoU13	not_expressed	host_expressed	105	6	C/D	Orphan	protein_coding	False	simple_initiation	Other	3	11699	8271	3323	3301	7	5	0.714286	-14.8	-3	4
snoDB1218	snoU13	not_expressed	intergenic	101	5	C/D	Orphan	intergenic	intergenic	intergenic	intergenic									-16.5	-1.4	3
snoDB1219	snoU13	not_expressed	host_expressed	112	11	C/D	Orphan	protein_coding	False	simple_initiation	Other	2	2968	391	2465	2437	19	18	0.947368	-17.3	-4.8	7
snoDB1222	snoU13	not_expressed	host_expressed	102	7	C/D	Orphan	non_coding	False	simple_initiation	non_functional_ncRNA	10	4733	3857	774	742	11	2	0.181818	-22.5	-0.4	2
snoDB1225	SNORA77	not_expressed	intergenic	128	0	H/ACA	Orphan	intergenic	intergenic	intergenic	intergenic									-47	-8.4	6
snoDB1227	snoU13	not_expressed	intergenic	102	6	C/D	Orphan	intergenic	intergenic	intergenic	intergenic									-16	-4.1	4
snoDB1233	snoU13	not_expressed	host_expressed	102	5	C/D	Orphan	protein_coding	False	dual_initiation	Other	10	7749	6668	979	945	17	8	0.470588	-20.4	-6.5	7
snoDB1234	snoU13	not_expressed	host_expressed	102	6	C/D	Orphan	protein_coding	False	simple_initiation	Other	4	2021	958	961	928	28	25	0.892857	-21.7	-2.6	3
snoDB1235	snoU13	not_expressed	intergenic	97	3	C/D	Orphan	intergenic	intergenic	intergenic	intergenic									-14.1	-2.2	3
snoDB1236	snoU13	not_expressed	intergenic	108	11	C/D	snRNA	intergenic	intergenic	intergenic	intergenic									-24.5	-2.5	3
snoDB1238	U3	not_expressed	intergenic	87	10	C/D	Orphan	intergenic	intergenic	intergenic	intergenic									-31.5	-8.2	7
snoDB1241	snoU13	not_expressed	intergenic	89	7	C/D	Orphan	intergenic	intergenic	intergenic	intergenic									-19.6	-2.4	1
snoDB1242	snoU13	not_expressed	host_expressed	104	6	C/D	Orphan	protein_coding	False	simple_initiation	Other	3	32773	843	31826	31797	13	11	0.846154	-16.4	-1	3
snoDB1244	snoU13	not_expressed	intergenic	114	6	C/D	Orphan	intergenic	intergenic	intergenic	intergenic									-21.7	-2.2	0
snoDB1252	snoU13	not_expressed	host_expressed	101	5	C/D	rRNA	protein_coding	True	dual_initiation	Other	4	16655	11403	5151	5118	11	8	0.727273	-25.3	-3.6	3
snoDB1253	snoU13	not_expressed	intergenic	103	5	C/D	Orphan	intergenic	intergenic	intergenic	intergenic									-22.9	-8.7	7
snoDB1258	snoU13	not_expressed	host_expressed	103	4	C/D	Orphan	protein_coding	False	simple_initiation	Other	6	12949	1637	11209	11176	8	3	0.375	-25.3	-5.6	6
snoDB1259	snoU13	not_expressed	intergenic	104	6	C/D	Orphan	intergenic	intergenic	intergenic	intergenic									-26.2	-4	6
snoDB1263	snoU13	not_expressed	host_not_expressed	100	5	C/D	Orphan	non_coding	False	simple_initiation	non_functional_ncRNA	2	142822	139269	3453	3425	3	2	0.666667	-22.1	-5.4	6
snoDB1266	snoU13	not_expressed	intergenic	103	10	C/D	rRNA	intergenic	intergenic	intergenic	intergenic									-30	-3.1	0
snoDB1267	snoU13	not_expressed	host_expressed	104	12	C/D	rRNA	protein_coding	False	dual_initiation	RNA binding, processing, splicing	19	1189	977	108	85	31	13	0.419355	-24.3	-3.3	8
snoDB1268	snoU13	not_expressed	host_expressed	106	5	C/D	rRNA	protein_coding	False	simple_initiation	Other	16	1467	194	1167	1129	73	58	0.794521	-19.5	-0.8	3
snoDB1269	snoU13	not_expressed	intergenic	106	6	C/D	Orphan	intergenic	intergenic	intergenic	intergenic									-27.1	-2	4
snoDB1272	U3	expressed	host_expressed	85	8	C/D	rRNA	protein_coding	False	simple_initiation	Poorly characterized	37	5679	2706	2888	2860	39	3	0.0769231	-20	-5.7	6
snoDB1278	snoU13	not_expressed	host_expressed	104	5	C/D	Orphan	protein_coding	True	simple_initiation	RNA binding, processing, splicing	18	619	342	173	134	62	45	0.725806	-12.9	-4.7	0
snoDB1279	snoU13	not_expressed	intergenic	105	5	C/D	Orphan	intergenic	intergenic	intergenic	intergenic									-21.7	-7.3	0
snoDB1280	snoU13	not_expressed	host_expressed	104	6	C/D	Orphan	protein_coding	False	simple_initiation	Other	1	45441	43433	1904	1878	4	4	1	-28.1	-2.2	3
snoDB1282	snoU13	not_expressed	intergenic	114	6	C/D	Orphan	intergenic	intergenic	intergenic	intergenic									-33.7	-4.5	4
snoDB1290	snoU13	not_expressed	intergenic	105	6	C/D	Orphan	intergenic	intergenic	intergenic	intergenic									-16.9	-1	3
snoDB1291	snoU13	not_expressed	intergenic	104	5	C/D	Orphan	intergenic	intergenic	intergenic	intergenic									-20.3	-1.8	6
snoDB1292	snoU13	expressed	host_expressed	118	6	C/D	Orphan	protein_coding	True	dual_initiation	Other	41	3365	2475	772	750	47	7	0.148936	-27.9	-6.9	5
snoDB1381	SNORD81L4	not_expressed	intergenic	76	8	C/D	rRNA	intergenic	intergenic	intergenic	intergenic									-10.4	-8.6	8
snoDB1384	SNORD3@L11	not_expressed	intergenic	181	11	C/D	Orphan	intergenic	intergenic	intergenic	intergenic									-31.3	-5.9	3
snoDB1390	Z73421.1	not_expressed	host_expressed	74	7	C/D	rRNA	protein_coding	False	simple_initiation	Other	7	132586	50014	82498	82464	15	9	0.6	-12.8	-1.2	3
snoDB1396	AC006023.2	not_expressed	intergenic	62	3	C/D	Orphan	intergenic	intergenic	intergenic	intergenic									-13.1	-6.1	5
snoDB1405	SNORD80L1	not_expressed	intergenic	82	3	C/D	Orphan	intergenic	intergenic	intergenic	intergenic									-8.5	-2	4
snoDB1413	AC138972.8	not_expressed	intergenic	91	9	H/ACA	Orphan	intergenic	intergenic	intergenic	intergenic									-18.4	-4.7	0
snoDB1416	SNORD3@L5	not_expressed	host_expressed	213	5	C/D	rRNA	protein_coding	False	simple_initiation	Other	1	11003	7786	3004	2974	1	1	1	-41.9	-2.9	5
snoDB1422	AP000818.4	not_expressed	host_expressed	93	1	C/D	Orphan	protein_coding	False	simple_initiation	Poorly characterized	17	2668	1352	1223	1196	18	2	0.111111	-8.6	-3.7	0
snoDB1425	SNORD66L1	not_expressed	intergenic	81	6	C/D	Orphan	intergenic	intergenic	intergenic	intergenic									-13.8	-10.1	7
snoDB1426	SNORA63L3	expressed	intergenic	99	6	H/ACA	Orphan	intergenic	intergenic	intergenic	intergenic									-17.2	0	0
snoDB1611	U3	not_expressed	intergenic	74	13	C/D	Orphan	intergenic	intergenic	intergenic	intergenic									-11.9	-1.1	3
snoDB1629	snoU13	not_expressed	intergenic	104	6	C/D	Orphan	intergenic	intergenic	intergenic	intergenic									-18.2	-4.5	4
snoDB1630	snoU13	not_expressed	intergenic	102	7	C/D	Orphan	intergenic	intergenic	intergenic	intergenic									-23.5	-1.5	6
snoDB1633	snoU13	not_expressed	intergenic	103	10	C/D	Orphan	intergenic	intergenic	intergenic	intergenic									-25.1	-1.6	2
snoDB1638	U3	not_expressed	intergenic	154	6	C/D	Orphan	intergenic	intergenic	intergenic	intergenic									-40.1	-3	6
snoDB1639	snoU13	not_expressed	intergenic	91	7	C/D	Orphan	intergenic	intergenic	intergenic	intergenic									-16.4	-2.4	4
snoDB1642	snoU13	not_expressed	host_not_expressed	89	6	C/D	Orphan	non_coding	False	simple_initiation	non_functional_ncRNA	1	5086	2110	2887	2861	2	2	1	-14	-0.6	3
snoDB1643	snoU13	not_expressed	intergenic	103	7	C/D	Orphan	intergenic	intergenic	intergenic	intergenic									-20.2	-4	4
snoDB1644	snoU13	not_expressed	intergenic	101	5	C/D	Orphan	intergenic	intergenic	intergenic	intergenic									-24.6	-2.6	4
snoDB1648	snoU13	not_expressed	host_not_expressed	101	5	C/D	Orphan	non_coding	False	simple_initiation	non_functional_ncRNA	3	158623	49524	108998	108963	6	4	0.666667	-21.6	-3.1	5
snoDB1653	U3	not_expressed	intergenic	181	4	C/D	Orphan	intergenic	intergenic	intergenic	intergenic									-60.2	-5.2	5
snoDB1654	U3	not_expressed	host_expressed	94	6	C/D	Orphan	protein_coding	True	simple_initiation	Other	3	10856	2437	8325	8302	13	11	0.846154	-18.5	-1.5	6
snoDB1656	snoU13	not_expressed	intergenic	104	6	C/D	Orphan	intergenic	intergenic	intergenic	intergenic									-13.4	-7.8	5
snoDB1657	snoU13	not_expressed	intergenic	105	9	C/D	Orphan	intergenic	intergenic	intergenic	intergenic									-21.1	-4.3	6
snoDB1661	snoU13	not_expressed	host_not_expressed	104	5	C/D	Orphan	non_coding	False	simple_initiation	non_functional_ncRNA	2	1920	1485	331	299	2	1	0.5	-14.3	-2.4	4
snoDB1662	snoU13	not_expressed	intergenic	107	7	C/D	Orphan	intergenic	intergenic	intergenic	intergenic									-20.5	-2	5
snoDB1663	snoU13	not_expressed	intergenic	104	10	C/D	Orphan	intergenic	intergenic	intergenic	intergenic									-22	-2	5
snoDB1664	snoU13	not_expressed	host_expressed	104	6	C/D	Orphan	non_coding	False	simple_initiation	non_functional_ncRNA	2	13772	9900	3768	3733	2	1	0.5	-16.5	-3.2	6
snoDB1665	snoU13	not_expressed	intergenic	101	11	C/D	Orphan	intergenic	intergenic	intergenic	intergenic									-24.2	-4.4	4
snoDB1666	snoU13	not_expressed	intergenic	105	5	C/D	Orphan	intergenic	intergenic	intergenic	intergenic									-25.2	-7.6	6
snoDB1667	snoU13	not_expressed	intergenic	99	6	C/D	Orphan	intergenic	intergenic	intergenic	intergenic									-24.3	-3.4	4
snoDB1671	U3	not_expressed	host_not_expressed	117	9	C/D	Orphan	non_coding	False	simple_initiation	non_functional_ncRNA	4	2369	320	1932	1893	5	2	0.4	-26.2	-6.7	7
snoDB1673	snoU13	not_expressed	intergenic	112	10	C/D	Orphan	intergenic	intergenic	intergenic	intergenic									-35.2	-3.7	4
snoDB1682	snoU13	not_expressed	intergenic	104	5	C/D	Orphan	intergenic	intergenic	intergenic	intergenic									-20.9	-5.9	6
snoDB1683	snoU13	not_expressed	intergenic	104	10	C/D	Orphan	intergenic	intergenic	intergenic	intergenic									-19	-0.7	3
snoDB1687	snoU13	not_expressed	intergenic	104	6	C/D	Orphan	intergenic	intergenic	intergenic	intergenic									-23.2	-2.2	3
snoDB1689	snoU13	not_expressed	intergenic	106	6	C/D	rRNA	intergenic	intergenic	intergenic	intergenic									-18.5	0	0
snoDB1691	snoU13	not_expressed	intergenic	106	6	C/D	rRNA	intergenic	intergenic	intergenic	intergenic									-20.9	-1.7	4
snoDB1695	U3	not_expressed	intergenic	84	9	C/D	rRNA	intergenic	intergenic	intergenic	intergenic									-24.7	-5.3	0
snoDB1698	U3	not_expressed	intergenic	84	8	C/D	Orphan	intergenic	intergenic	intergenic	intergenic									-19.4	-0.6	3
snoDB1699	U3	not_expressed	host_not_expressed	113	7	C/D	rRNA	non_coding	False	simple_initiation	non_functional_ncRNA	3	26761	3159	23489	23463	3	1	0.333333	-27.5	-3.7	3
snoDB1700	U3	not_expressed	intergenic	115	5	C/D	Orphan	intergenic	intergenic	intergenic	intergenic									-21.3	-8.6	3
snoDB1703	snoU13	not_expressed	host_expressed	97	12	C/D	Orphan	protein_coding	False	simple_initiation	Poorly characterized	1	94246	20000	74149	74120	9	9	1	-19.6	-5.7	4
snoDB1707	U3	not_expressed	intergenic	111	9	C/D	Orphan	intergenic	intergenic	intergenic	intergenic									-23.8	-0.9	3
snoDB1711	snoU13	not_expressed	host_expressed	104	7	C/D	Orphan	protein_coding	False	simple_initiation	Other	13	10496	8275	2117	2078	27	15	0.555556	-21.1	-7	6
snoDB1712	SNORD39	not_expressed	intergenic	74	3	C/D	Orphan	intergenic	intergenic	intergenic	intergenic									-19.6	-5.3	0
snoDB1713	U3	not_expressed	intergenic	114	6	C/D	Orphan	intergenic	intergenic	intergenic	intergenic									-29.6	-3.5	0
snoDB1718	snoU13	not_expressed	intergenic	101	6	C/D	Orphan	intergenic	intergenic	intergenic	intergenic									-25.9	-1.2	3
snoDB1720	snoU13	not_expressed	host_expressed	117	5	C/D	Orphan	protein_coding	True	simple_initiation	Other	6	3119	1036	1966	1934	18	13	0.722222	-24.7	-2.4	4
snoDB1721	snoU13	not_expressed	intergenic	104	6	C/D	Orphan	intergenic	intergenic	intergenic	intergenic									-14.5	-5.1	5
snoDB1725	snoU13	not_expressed	intergenic	108	7	C/D	Orphan	intergenic	intergenic	intergenic	intergenic									-37.7	-7.3	0
snoDB1729	snoU13	not_expressed	intergenic	87	5	C/D	rRNA	intergenic	intergenic	intergenic	intergenic									-22.5	-3.4	5
snoDB1730	snoU13	not_expressed	intergenic	105	7	C/D	Orphan	intergenic	intergenic	intergenic	intergenic									-18.3	-3.7	5
snoDB1731	U3	not_expressed	host_not_expressed	91	7	C/D	Orphan	non_coding	False	simple_initiation	non_functional_ncRNA	6	62295	20797	41407	41379	6	1	0.166667	-18.9	-1.7	4
snoDB1732	snoU13	not_expressed	intergenic	113	5	C/D	Orphan	intergenic	intergenic	intergenic	intergenic									-26.4	-5.4	5
snoDB1736	snoU13	not_expressed	host_expressed	103	8	C/D	Orphan	non_coding	False	simple_initiation	non_functional_ncRNA	2	20185	14309	5773	5747	10	9	0.9	-19	-2.6	4
snoDB1737	snoU13	not_expressed	intergenic	93	8	C/D	Orphan	intergenic	intergenic	intergenic	intergenic									-17.7	-3.6	10
snoDB1738	U3	expressed	intergenic	102	9	C/D	Orphan	intergenic	intergenic	intergenic	intergenic									-22.9	-10.1	10
snoDB1739	snoU13	not_expressed	intergenic	101	10	C/D	Orphan	intergenic	intergenic	intergenic	intergenic									-27.3	-2.7	5
snoDB1742	snoU13	not_expressed	host_not_expressed	104	6	C/D	Orphan	non_coding	False	simple_initiation	non_functional_ncRNA	1	54708	7022	47582	47549	3	3	1	-27.5	-3.2	5
snoDB1744	U3	not_expressed	intergenic	90	6	C/D	Orphan	intergenic	intergenic	intergenic	intergenic									-21.9	-7.7	9
snoDB1746	snoU13	not_expressed	host_expressed	104	6	C/D	Orphan	protein_coding	False	simple_initiation	Other	3	1531	268	1159	1122	14	12	0.857143	-18.7	-6.7	7
snoDB1747	snoU13	not_expressed	intergenic	104	7	C/D	Orphan	intergenic	intergenic	intergenic	intergenic									-15.3	-1.3	5
snoDB1750	snoU13	not_expressed	host_expressed	106	7	C/D	Orphan	protein_coding	False	simple_initiation	Poorly characterized	12	17824	1873	15845	15820	13	2	0.153846	-23.6	-2.5	4
snoDB1751	snoU13	not_expressed	host_not_expressed	104	8	C/D	Orphan	protein_coding	False	simple_initiation	Poorly characterized	10	10370	7158	3108	3081	10	1	0.1	-20.5	-7.5	9
snoDB1752	snoU13	not_expressed	host_expressed	107	5	C/D	Orphan	protein_coding	False	simple_initiation	Other	11	4830	2077	2646	2618	26	16	0.615385	-21.4	-4.6	4
snoDB1753	snoU13	not_expressed	intergenic	94	10	C/D	Orphan	intergenic	intergenic	intergenic	intergenic									-20.5	-2.8	2
snoDB1755	U3	not_expressed	intergenic	105	7	C/D	Orphan	intergenic	intergenic	intergenic	intergenic									-24.8	-0.4	0
snoDB1758	U3	not_expressed	intergenic	212	10	C/D	Orphan	intergenic	intergenic	intergenic	intergenic									-68.2	-8.3	6
snoDB1759	U3	not_expressed	intergenic	112	6	C/D	Orphan	intergenic	intergenic	intergenic	intergenic									-33.6	-4	6
snoDB1764	snoU13	not_expressed	host_expressed	103	6	C/D	Orphan	protein_coding	False	dual_initiation	Other	4	2217	873	1241	1218	9	6	0.666667	-21.4	-2.5	5
snoDB1765	snoU13	not_expressed	intergenic	102	6	C/D	Orphan	intergenic	intergenic	intergenic	intergenic									-22.2	0	0
snoDB1766	snoU13	not_expressed	intergenic	93	6	C/D	Orphan	intergenic	intergenic	intergenic	intergenic									-21.5	-3.6	6
snoDB1767	snoU13	not_expressed	intergenic	102	5	C/D	Orphan	intergenic	intergenic	intergenic	intergenic									-25.5	-5.6	6
snoDB1771	U3	expressed	intergenic	82	10	C/D	Orphan	intergenic	intergenic	intergenic	intergenic									-20.3	-1.9	4
snoDB1890	U3	expressed	host_expressed	79	10	C/D	Orphan	protein_coding	False	simple_initiation	Poorly characterized	19	108957	17718	91160	91135	61	43	0.704918	-22	-4.1	3
snoDB1916	snoU13	not_expressed	host_not_expressed	104	6	C/D	Orphan	protein_coding	False	simple_initiation	Poorly characterized	2	15598	6701	8793	8757	23	22	0.956522	-16.8	-3.4	4
snoDB1926	U3	not_expressed	intergenic	213	4	C/D	Orphan	intergenic	intergenic	intergenic	intergenic									-62.6	-5.2	8
snoDB1929	snoU13	not_expressed	intergenic	104	6	C/D	Orphan	intergenic	intergenic	intergenic	intergenic									-20.6	-1	3
snoDB1935	snoU13	not_expressed	intergenic	104	6	C/D	Orphan	intergenic	intergenic	intergenic	intergenic									-18.7	-3	5
snoDB1936	snoU13	not_expressed	host_not_expressed	101	11	C/D	Orphan	protein_coding	False	simple_initiation	Other	3	7918	3658	4159	4135	17	15	0.882353	-18.7	-1.6	8
snoDB1938	U3	expressed	intergenic	92	5	C/D	Orphan	intergenic	intergenic	intergenic	intergenic									-19.4	-2.1	3
snoDB1939	U3	not_expressed	host_not_expressed	73	8	C/D	Orphan	non_coding	False	simple_initiation	non_functional_ncRNA	2	2114	320	1721	1698	3	2	0.666667	-20.8	-0.6	3
snoDB1942	U3	not_expressed	host_not_expressed	198	11	C/D	Orphan	protein_coding	False	simple_initiation	Poorly characterized	12	848963	721300	127465	127434	23	12	0.521739	-41.4	-6.4	7
snoDB1948	U3	not_expressed	intergenic	81	14	C/D	Orphan	intergenic	intergenic	intergenic	intergenic									-18.8	-8.4	8
snoDB1949	U3	not_expressed	intergenic	122	10	C/D	Orphan	intergenic	intergenic	intergenic	intergenic									-22.2	-5	10
snoDB1958	U3	not_expressed	intergenic	77	9	C/D	Orphan	intergenic	intergenic	intergenic	intergenic									-32.3	-2.2	8
snoDB1959	snoU13	not_expressed	intergenic	108	6	C/D	Orphan	intergenic	intergenic	intergenic	intergenic									-20.6	-0.1	4
snoDB1960	U3	not_expressed	intergenic	77	10	C/D	Orphan	intergenic	intergenic	intergenic	intergenic									-17.4	-2.5	2
snoDB1964	U3	not_expressed	intergenic	78	10	C/D	Orphan	intergenic	intergenic	intergenic	intergenic									-19.6	0	0
snoDB1968	snoU13	not_expressed	intergenic	99	7	C/D	Orphan	intergenic	intergenic	intergenic	intergenic									-17.5	-2.6	0
snoDB1969	snoU13	not_expressed	intergenic	92	5	C/D	Orphan	intergenic	intergenic	intergenic	intergenic									-16.3	-0.2	2
snoDB1970	snoU13	not_expressed	intergenic	104	5	C/D	Orphan	intergenic	intergenic	intergenic	intergenic									-23.5	-2.9	5
snoDB1974	snoU13	not_expressed	host_expressed	100	6	C/D	Orphan	protein_coding	False	simple_initiation	Other	1	196027	164234	31693	31663	30	30	1	-17	-3	5
snoDB1980	U3	not_expressed	intergenic	102	11	C/D	Orphan	intergenic	intergenic	intergenic	intergenic									-24.7	-5	7
snoDB1989	SNORD3@L38	expressed	intergenic	188	3	C/D	Orphan	intergenic	intergenic	intergenic	intergenic									-49.4	-6.2	5
snoDB1997	SNORD3@L36	expressed	intergenic	159	5	C/D	Orphan	intergenic	intergenic	intergenic	intergenic									-24.8	-0.1	2
snoDB2007	SNORD3@L47	not_expressed	host_not_expressed	197	5	C/D	Orphan	protein_coding	False	simple_initiation	Other	2	88101	38782	49122	49087	17	16	0.941176	-59.8	-3.6	3
snoDB2021	U3	not_expressed	intergenic	75	9	C/D	Orphan	intergenic	intergenic	intergenic	intergenic									-11.7	-2	1
snoDB25	snoU13	not_expressed	host_expressed	104	5	C/D	Orphan	protein_coding	False	simple_initiation	Other	1	57973	6613	51256	51231	8	8	1	-23.9	-2.8	3
snoDB252	snoU13	not_expressed	intergenic	95	5	C/D	rRNA	intergenic	intergenic	intergenic	intergenic									-13.7	-7	3
snoDB253	snoU13	not_expressed	host_expressed	104	9	C/D	rRNA	protein_coding	False	simple_initiation	Other	1	3525	518	2903	2864	5	5	1	-21.9	-4	3
snoDB255	snoU13	not_expressed	intergenic	104	6	C/D	Orphan	intergenic	intergenic	intergenic	intergenic									-14	-5.4	5
snoDB256	snoU13	not_expressed	intergenic	101	7	C/D	snRNA	intergenic	intergenic	intergenic	intergenic									-26.8	-4	5
snoDB257	snoU13	not_expressed	host_expressed	103	5	C/D	Orphan	protein_coding	True	dual_initiation	Other	2	67495	14078	53314	53289	3	2	0.666667	-24.4	-0.5	3
snoDB259	snoU13	not_expressed	intergenic	104	5	C/D	rRNA	intergenic	intergenic	intergenic	intergenic									-19.5	-0.8	5
snoDB263	snoU13	not_expressed	intergenic	103	5	C/D	rRNA	intergenic	intergenic	intergenic	intergenic									-22.6	-4.5	4
snoDB265	snoU13	not_expressed	host_expressed	105	5	C/D	snRNA	protein_coding	True	simple_initiation	Other	1	122647	81780	40762	40734	23	23	1	-22.3	-5.2	5
snoDB271	snoU13	not_expressed	intergenic	104	10	C/D	rRNA	intergenic	intergenic	intergenic	intergenic									-24.3	-7.3	7
snoDB272	snoU13	not_expressed	intergenic	99	7	C/D	rRNA	intergenic	intergenic	intergenic	intergenic									-16.6	-4.7	3
snoDB275	snoU13	not_expressed	intergenic	104	5	C/D	Orphan	intergenic	intergenic	intergenic	intergenic									-21	-2.8	4
snoDB276	snoU13	not_expressed	host_expressed	110	6	C/D	Orphan	protein_coding	False	simple_initiation	Poorly characterized	1	29500	17430	11960	11937	4	4	1	-38.8	-3.3	4
snoDB282	snoU13	not_expressed	intergenic	103	5	C/D	Orphan	intergenic	intergenic	intergenic	intergenic									-23.1	-5.7	7
snoDB285	snoU13	not_expressed	host_expressed	104	10	C/D	Orphan	protein_coding	True	simple_initiation	Other	4	1527	748	675	631	19	16	0.842105	-24.4	-1.6	4
snoDB286	snoU13	not_expressed	intergenic	111	8	C/D	Orphan	intergenic	intergenic	intergenic	intergenic									-25.8	-5.7	5
snoDB292	snoU13	not_expressed	host_expressed	97	7	C/D	Orphan	protein_coding	True	simple_initiation	Other	16	1164	110	957	931	41	26	0.634146	-22.1	0	0
snoDB293	snoU13	not_expressed	host_expressed	107	12	C/D	Orphan	protein_coding	False	dual_initiation	Poorly characterized	12	59790	21395	38288	38253	17	6	0.352941	-18.8	-2.1	4
snoDB294	snoU13	not_expressed	intergenic	103	5	C/D	Orphan	intergenic	intergenic	intergenic	intergenic									-25.5	-3.7	4
snoDB295	snoU13	not_expressed	intergenic	107	8	C/D	Orphan	intergenic	intergenic	intergenic	intergenic									-13.8	-2.1	5
snoDB300	snoU13	not_expressed	intergenic	99	10	C/D	Orphan	intergenic	intergenic	intergenic	intergenic									-20.7	-2.5	3
snoDB301	snoU13	not_expressed	intergenic	93	6	C/D	Orphan	intergenic	intergenic	intergenic	intergenic									-18.6	-1.9	3
snoDB302	snoU13	not_expressed	intergenic	97	6	C/D	Orphan	intergenic	intergenic	intergenic	intergenic									-14.7	-7.5	6
snoDB303	snoU13	not_expressed	intergenic	104	4	C/D	Orphan	intergenic	intergenic	intergenic	intergenic									-16.5	-2.1	4
snoDB304	snoU13	not_expressed	host_expressed	104	7	C/D	Orphan	protein_coding	True	simple_initiation	Other	2	14887	10670	4113	4086	28	27	0.964286	-22.4	-1.9	4
snoDB306	snoU13	not_expressed	intergenic	100	6	C/D	Orphan	intergenic	intergenic	intergenic	intergenic									-17.2	-2.5	3
snoDB312	snoU13	not_expressed	intergenic	104	9	C/D	Orphan	intergenic	intergenic	intergenic	intergenic									-20.4	-0.6	3
snoDB318	snoU13	not_expressed	host_not_expressed	104	6	C/D	Orphan	protein_coding	False	simple_initiation	Other	1	29611	28663	844	808	5	5	1	-17.3	-3.5	5
snoDB319	snoU13	not_expressed	host_expressed	88	7	C/D	Orphan	protein_coding	False	simple_initiation	Poorly characterized	1	9147	5393	3666	3628	4	4	1	-17.2	-6.7	5
snoDB320	SNORD43L1	not_expressed	host_not_expressed	63	4	C/D	Orphan	protein_coding	False	simple_initiation	Poorly characterized	2	5244	1972	3209	3166	11	10	0.909091	-16.3	-7.5	6
snoDB326	snoU13	not_expressed	intergenic	104	7	C/D	Orphan	intergenic	intergenic	intergenic	intergenic									-16.6	-5.7	6
snoDB328	SNORA70	not_expressed	host_not_expressed	138	9	H/ACA	Orphan	non_coding	False	simple_initiation	non_functional_ncRNA	1	9622	3371	6113	6089	1	1	1	-31.4	-6	5
snoDB329	SNORA70	not_expressed	intergenic	138	9	H/ACA	Orphan	intergenic	intergenic	intergenic	intergenic									-31.4	-3.3	1
snoDB336	snoU13	not_expressed	intergenic	102	9	C/D	Orphan	intergenic	intergenic	intergenic	intergenic									-21.9	-5.9	3
snoDB337	snoU13	not_expressed	intergenic	104	7	C/D	Orphan	intergenic	intergenic	intergenic	intergenic									-26.7	-2	4
snoDB338	snoU13	expressed	host_expressed	101	6	C/D	rRNA	protein_coding	False	simple_initiation	Other	3	4132	3120	911	888	9	7	0.777778	-19.3	-9.2	7
snoDB344	snoU13	not_expressed	intergenic	101	6	C/D	Orphan	intergenic	intergenic	intergenic	intergenic									-24	-2.1	4
snoDB364	U3	expressed	intergenic	80	13	C/D	snRNA	intergenic	intergenic	intergenic	intergenic									-23.9	-2.5	3
snoDB367	snoU13	not_expressed	host_not_expressed	106	8	C/D	Orphan	protein_coding	False	simple_initiation	Other	6	480	283	91	64	11	6	0.545455	-16.2	-1.1	5
snoDB368	snoU13	not_expressed	host_expressed	96	3	C/D	Orphan	protein_coding	False	simple_initiation	Other	2	6830	3341	3393	3357	13	12	0.923077	-24.1	-7	3
snoDB370	snoU13	not_expressed	intergenic	104	5	C/D	Orphan	intergenic	intergenic	intergenic	intergenic									-26.9	-4.1	6
snoDB371	snoU13	not_expressed	intergenic	99	7	C/D	Orphan	intergenic	intergenic	intergenic	intergenic									-20	-5.8	0
snoDB372	snoU13	not_expressed	host_expressed	102	6	C/D	Orphan	protein_coding	False	simple_initiation	Poorly characterized	2	222309	153617	68590	68555	13	12	0.923077	-27.9	-3.9	6
snoDB378	snoU13	not_expressed	host_expressed	104	11	C/D	Orphan	protein_coding	False	simple_initiation	Poorly characterized	0	0	0	0	0	4	0	0	-16.5	-11.5	9
snoDB379	snoU13	not_expressed	intergenic	104	6	C/D	Orphan	intergenic	intergenic	intergenic	intergenic									-22.9	-4.8	4
snoDB386	snoU13	not_expressed	intergenic	102	5	C/D	Orphan	intergenic	intergenic	intergenic	intergenic									-16.1	-1.8	5
snoDB387	U3	not_expressed	intergenic	85	9	C/D	Orphan	intergenic	intergenic	intergenic	intergenic									-21	-3.3	3
snoDB391	snoU13	not_expressed	host_not_expressed	104	6	C/D	Orphan	non_coding	False	simple_initiation	non_functional_ncRNA	9	79435	62602	16729	16703	14	6	0.428571	-17.2	-3.8	7
snoDB392	snoU13	not_expressed	host_expressed	102	4	C/D	rRNA	protein_coding	False	simple_initiation	Other	13	78155	41608	36445	36407	21	9	0.428571	-27.3	-4.8	5
snoDB396	snoU13	not_expressed	intergenic	98	6	C/D	Orphan	intergenic	intergenic	intergenic	intergenic									-20.9	-7.6	10
snoDB399	snoU13	not_expressed	intergenic	95	10	C/D	Orphan	intergenic	intergenic	intergenic	intergenic									-23.6	-1.4	3
snoDB400	snoU13	not_expressed	intergenic	104	7	C/D	Orphan	intergenic	intergenic	intergenic	intergenic									-21	-1.2	3
snoDB401	snoU13	not_expressed	host_expressed	81	12	C/D	Orphan	protein_coding	False	dual_initiation	RNA binding, processing, splicing	4	1317	243	993	971	9	6	0.666667	-19.6	-2.9	6
snoDB407	snoU13	not_expressed	host_expressed	103	6	C/D	rRNA	protein_coding	False	simple_initiation	Other	1	68947	3533	65311	65276	4	4	1	-17.1	-4.2	7
snoDB408	snoU13	not_expressed	intergenic	92	5	C/D	rRNA	intergenic	intergenic	intergenic	intergenic									-23.2	-3.4	3
snoDB409	snoU13	not_expressed	host_expressed	102	6	C/D	Orphan	protein_coding	False	simple_initiation	Other	4	67185	56654	10429	10396	47	44	0.93617	-30.6	-0.9	4
snoDB410	U3	not_expressed	intergenic	136	4	C/D	Orphan	intergenic	intergenic	intergenic	intergenic									-54	-9.5	9
snoDB413	snoU13	not_expressed	intergenic	104	5	C/D	rRNA	intergenic	intergenic	intergenic	intergenic									-26.9	-4.5	4
snoDB414	snoU13	not_expressed	intergenic	103	5	C/D	Orphan	intergenic	intergenic	intergenic	intergenic									-35	-7.3	2
snoDB424	snoU13	not_expressed	intergenic	104	6	C/D	Orphan	intergenic	intergenic	intergenic	intergenic									-22.6	-5.4	5
snoDB426	U3	expressed	intergenic	82	4	C/D	Orphan	intergenic	intergenic	intergenic	intergenic									-21.5	-7.9	4
snoDB431	snoU13	not_expressed	intergenic	101	5	C/D	rRNA	intergenic	intergenic	intergenic	intergenic									-24.1	-4.3	4
snoDB432	snoU13	not_expressed	intergenic	104	5	C/D	Orphan	intergenic	intergenic	intergenic	intergenic									-14.4	-2.4	3
snoDB435	snoU13	not_expressed	intergenic	98	6	C/D	Orphan	intergenic	intergenic	intergenic	intergenic									-17.6	-5.1	5
snoDB438	snoU13	not_expressed	intergenic	104	9	C/D	snRNA	intergenic	intergenic	intergenic	intergenic									-17.9	-3.8	4
snoDB439	snoU13	not_expressed	intergenic	104	6	C/D	Orphan	intergenic	intergenic	intergenic	intergenic									-20	-1.9	2
snoDB442	snoU13	expressed	host_expressed	104	11	C/D	Orphan	protein_coding	True	simple_initiation	Poorly characterized	3	10603	4617	5882	5845	15	13	0.866667	-25.4	-4.6	8
snoDB443	snoU13	not_expressed	intergenic	101	7	C/D	Orphan	intergenic	intergenic	intergenic	intergenic									-25.7	-4	4
snoDB447	SNORD45AL1	not_expressed	intergenic	83	5	C/D	Orphan	intergenic	intergenic	intergenic	intergenic									-6.6	-7.1	9
snoDB450	snoU13	not_expressed	intergenic	128	4	C/D	Orphan	intergenic	intergenic	intergenic	intergenic									-20.7	-4.5	4
snoDB460	snoU13	not_expressed	host_expressed	104	6	C/D	Orphan	protein_coding	True	simple_initiation	Other	1	42082	9220	32758	32718	7	7	1	-23	-2.9	5
snoDB461	snoU13	not_expressed	intergenic	104	4	C/D	Orphan	intergenic	intergenic	intergenic	intergenic									-26.4	-1.2	3
snoDB470	snoU13	not_expressed	intergenic	100	6	C/D	Orphan	intergenic	intergenic	intergenic	intergenic									-19.7	-2.4	5
snoDB471	snoU13	not_expressed	intergenic	102	7	C/D	Orphan	intergenic	intergenic	intergenic	intergenic									-14.9	-0.6	6
snoDB472	snoU13	not_expressed	intergenic	101	12	C/D	Orphan	intergenic	intergenic	intergenic	intergenic									-13.2	-0.4	2
snoDB473	snoU13	not_expressed	intergenic	104	7	C/D	Orphan	intergenic	intergenic	intergenic	intergenic									-24.4	-0.6	3
snoDB478	snoU13	not_expressed	host_expressed	102	6	C/D	Orphan	protein_coding	False	simple_initiation	Poorly characterized	10	100922	6355	94465	94428	17	8	0.470588	-15.3	-1	3
snoDB479	snoU13	not_expressed	host_expressed	101	5	C/D	Orphan	protein_coding	False	simple_initiation	Other	4	1623	1417	105	78	14	11	0.785714	-24.7	-1.2	0
snoDB480	snoU13	not_expressed	intergenic	104	6	C/D	Orphan	intergenic	intergenic	intergenic	intergenic									-17.7	-1.4	3
snoDB486	snoU13	not_expressed	intergenic	102	8	C/D	Orphan	intergenic	intergenic	intergenic	intergenic									-23.6	-0.5	3
snoDB489	snoU13	not_expressed	host_expressed	99	6	C/D	Orphan	protein_coding	False	simple_initiation	Other	3	4871	1724	3048	3014	80	78	0.975	-17.3	-1.4	4
snoDB491	U3	not_expressed	intergenic	78	9	C/D	Orphan	intergenic	intergenic	intergenic	intergenic									-12	-8.7	8
snoDB495	snoU13	not_expressed	intergenic	72	7	C/D	rRNA	intergenic	intergenic	intergenic	intergenic									-10.9	-7.3	1
snoDB509	snoU13	not_expressed	intergenic	100	6	C/D	Orphan	intergenic	intergenic	intergenic	intergenic									-26	-4.4	5
snoDB512	U3	not_expressed	host_expressed	70	14	C/D	Orphan	protein_coding	False	dual_initiation	Other	1	38373	10979	27324	27288	13	13	1	-16.3	-3.1	2
snoDB515	snoU13	not_expressed	intergenic	70	8	C/D	Orphan	intergenic	intergenic	intergenic	intergenic									-16.1	-9.5	2
snoDB516	snoU13	not_expressed	intergenic	100	6	C/D	Orphan	intergenic	intergenic	intergenic	intergenic									-24.3	-5.2	6
snoDB517	snoU13	not_expressed	intergenic	102	6	C/D	Orphan	intergenic	intergenic	intergenic	intergenic									-21.2	-5.4	6
snoDB518	snoU13	not_expressed	intergenic	113	6	C/D	Orphan	intergenic	intergenic	intergenic	intergenic									-21.5	-3.1	5
snoDB519	U3	expressed	intergenic	86	6	C/D	Orphan	intergenic	intergenic	intergenic	intergenic									-28	-10	5
snoDB522	U3	not_expressed	host_expressed	87	7	C/D	Orphan	protein_coding	False	simple_initiation	Other	4	2666	995	1584	1554	16	13	0.8125	-28	-3.7	3
snoDB525	SNORA70FL2	not_expressed	intergenic	141	6	H/ACA	Orphan	intergenic	intergenic	intergenic	intergenic									-38.6	-0.4	0
snoDB528	snoU13	not_expressed	intergenic	104	5	C/D	Orphan	intergenic	intergenic	intergenic	intergenic									-18.3	-1.1	7
snoDB529	snoU13	not_expressed	host_expressed	99	6	C/D	rRNA	non_coding	False	simple_initiation	non_functional_ncRNA	0	0	0	0	0	4	0	0	-22.6	-2.6	4
snoDB530	snoU13	not_expressed	intergenic	104	4	C/D	Orphan	intergenic	intergenic	intergenic	intergenic									-16.5	-2.9	7
snoDB532	snoU13	not_expressed	host_expressed	101	4	C/D	Orphan	protein_coding	False	simple_initiation	Poorly characterized	11	3885	2313	1471	1447	12	2	0.166667	-23.8	-4.1	5
snoDB533	snoU13	not_expressed	intergenic	110	5	C/D	Orphan	intergenic	intergenic	intergenic	intergenic									-28.8	-0.1	2
snoDB534	snoU13	expressed	host_expressed	104	5	C/D	rRNA	protein_coding	False	simple_initiation	Poorly characterized	4	68505	68052	349	311	14	11	0.785714	-21.7	-1.4	2
snoDB538	snoU13	not_expressed	intergenic	81	6	C/D	rRNA	intergenic	intergenic	intergenic	intergenic									-13.4	-8	6
snoDB539	U3	not_expressed	intergenic	72	9	C/D	Orphan	intergenic	intergenic	intergenic	intergenic									-8.9	-1.5	4
snoDB541	snoU13	not_expressed	host_expressed	103	6	C/D	Orphan	protein_coding	False	simple_initiation	RNA binding, processing, splicing	5	7361	6579	679	644	9	5	0.555556	-27.1	-2.8	3
snoDB543	U3	not_expressed	intergenic	98	7	C/D	rRNA	intergenic	intergenic	intergenic	intergenic									-24.3	-6.2	3
snoDB553	snoU13	not_expressed	intergenic	108	9	C/D	rRNA	intergenic	intergenic	intergenic	intergenic									-29.9	-4.6	4
snoDB554	snoU13	not_expressed	intergenic	104	6	C/D	Orphan	intergenic	intergenic	intergenic	intergenic									-26	-3.9	4
snoDB555	snoU13	not_expressed	intergenic	99	6	C/D	Orphan	intergenic	intergenic	intergenic	intergenic									-16.8	-1.8	5
snoDB556	snoU13	not_expressed	intergenic	104	6	C/D	Orphan	intergenic	intergenic	intergenic	intergenic									-21.4	-3.6	3
snoDB566	snoU13	not_expressed	intergenic	98	7	C/D	Orphan	intergenic	intergenic	intergenic	intergenic									-25.7	-5.8	4
snoDB572	snoU13	not_expressed	intergenic	101	10	C/D	Orphan	intergenic	intergenic	intergenic	intergenic									-22.6	-5.9	6
snoDB579	snoU13	not_expressed	host_expressed	104	7	C/D	Orphan	protein_coding	True	dual_initiation	Other	4	4261	2134	2023	1985	16	13	0.8125	-15.7	-5.9	5
snoDB580	snoU13	not_expressed	intergenic	106	5	C/D	Orphan	intergenic	intergenic	intergenic	intergenic									-28.7	-3.6	4
snoDB581	snoU13	not_expressed	host_expressed	91	3	C/D	Orphan	protein_coding	False	simple_initiation	Other	2	10987	9032	1864	1836	6	5	0.833333	-13.8	-1.8	2
snoDB582	snoU13	expressed	host_expressed	104	6	C/D	Orphan	protein_coding	False	simple_initiation	Poorly characterized	3	20260	19452	704	669	7	5	0.714286	-19.7	-5.9	8
snoDB585	U3	not_expressed	intergenic	90	12	C/D	Orphan	intergenic	intergenic	intergenic	intergenic									-27.9	0	0
snoDB591	snoU13	not_expressed	intergenic	102	10	C/D	Orphan	intergenic	intergenic	intergenic	intergenic									-20.3	-3.2	4
snoDB597	snoU13	not_expressed	intergenic	129	5	C/D	Orphan	intergenic	intergenic	intergenic	intergenic									-31.1	-3.1	5
snoDB598	snoU13	not_expressed	host_expressed	107	6	C/D	Orphan	protein_coding	False	simple_initiation	Other	2	42736	14801	27828	27795	7	6	0.857143	-21.8	-2.1	5
snoDB599	snoU13	not_expressed	intergenic	99	5	C/D	Orphan	intergenic	intergenic	intergenic	intergenic									-22.2	-2.6	4
snoDB602	snoU13	not_expressed	intergenic	100	10	C/D	Orphan	intergenic	intergenic	intergenic	intergenic									-18.7	-4.1	4
snoDB603	snoU13	not_expressed	intergenic	104	5	C/D	Orphan	intergenic	intergenic	intergenic	intergenic									-24.1	-6.1	12
snoDB604	snoU13	not_expressed	host_expressed	89	7	C/D	Orphan	protein_coding	True	simple_initiation	Poorly characterized	0	0	0	0	0	3	0	0	-12.6	-9.8	4
snoDB612	snoU13	not_expressed	intergenic	111	3	C/D	Orphan	intergenic	intergenic	intergenic	intergenic									-18.1	-2.2	4
snoDB613	snoU13	not_expressed	intergenic	107	6	C/D	Orphan	intergenic	intergenic	intergenic	intergenic									-19.6	-0.8	2
snoDB616	U3	not_expressed	intergenic	148	9	C/D	Orphan	intergenic	intergenic	intergenic	intergenic									-31.6	-3.1	0
snoDB619	snoU13	not_expressed	intergenic	106	11	C/D	rRNA	intergenic	intergenic	intergenic	intergenic									-19.2	-0.5	3
snoDB620	snoU13	not_expressed	host_expressed	104	7	C/D	Orphan	protein_coding	False	simple_initiation	Other	14	10576	10063	409	372	15	2	0.133333	-26.2	-4.5	4
snoDB621	snoU13	not_expressed	host_expressed	103	6	C/D	Orphan	protein_coding	True	dual_initiation	Other	2	5720	2983	2634	2607	2	1	0.5	-16.8	-4.5	5
snoDB626	snoU13	not_expressed	intergenic	101	6	C/D	Orphan	intergenic	intergenic	intergenic	intergenic									-18.9	-4	4
snoDB627	snoU13	not_expressed	intergenic	98	4	C/D	Orphan	intergenic	intergenic	intergenic	intergenic									-20.9	-9.3	7
snoDB628	snoU13	not_expressed	intergenic	106	8	C/D	Orphan	intergenic	intergenic	intergenic	intergenic									-23.8	-4.9	3
snoDB629	snoU13	not_expressed	intergenic	102	5	C/D	Orphan	intergenic	intergenic	intergenic	intergenic									-19.6	-2.1	10
snoDB630	snoU13	not_expressed	intergenic	105	10	C/D	Orphan	intergenic	intergenic	intergenic	intergenic									-21	-4.5	5
snoDB631	U3	expressed	intergenic	77	9	C/D	Orphan	intergenic	intergenic	intergenic	intergenic									-18.2	0	0
snoDB636	SNORD66	not_expressed	intergenic	75	10	C/D	rRNA	intergenic	intergenic	intergenic	intergenic									-13.6	-7.3	5
snoDB646	snoU13	not_expressed	host_not_expressed	104	6	C/D	rRNA	non_coding	False	simple_initiation	non_functional_ncRNA	2	246906	191599	55203	55172	4	3	0.75	-21	-4	10
snoDB647	snoU13	not_expressed	intergenic	104	7	C/D	Orphan	intergenic	intergenic	intergenic	intergenic									-33.6	-6.3	6
snoDB648	U3	not_expressed	intergenic	97	7	C/D	Orphan	intergenic	intergenic	intergenic	intergenic									-33.7	-3.4	3
snoDB650	snoU13	not_expressed	intergenic	104	7	C/D	Orphan	intergenic	intergenic	intergenic	intergenic									-20.5	-7.7	5
snoDB651	snoU13	not_expressed	intergenic	104	6	C/D	Orphan	intergenic	intergenic	intergenic	intergenic									-18.4	-1.9	4
snoDB652	snoU13	not_expressed	intergenic	105	6	C/D	Orphan	intergenic	intergenic	intergenic	intergenic									-31.3	-3.4	3
snoDB653	snoU13	not_expressed	intergenic	104	5	C/D	Orphan	intergenic	intergenic	intergenic	intergenic									-19	-3	5
snoDB654	snoU13	expressed	intergenic	104	6	C/D	Orphan	intergenic	intergenic	intergenic	intergenic									-16.5	-8.6	3
snoDB658	snoU13	not_expressed	intergenic	101	6	C/D	Orphan	intergenic	intergenic	intergenic	intergenic									-18	-4.6	6
snoDB659	snoU13	not_expressed	intergenic	104	6	C/D	Orphan	intergenic	intergenic	intergenic	intergenic									-21.6	-4.1	0
snoDB665	SNORA20	not_expressed	host_expressed	132	9	H/ACA	rRNA	protein_coding	False	simple_initiation	Other	15	1862	978	752	715	29	15	0.517241	-30.3	-6.9	10
snoDB667	snoU13	not_expressed	intergenic	101	10	C/D	rRNA	intergenic	intergenic	intergenic	intergenic									-22.1	-3.8	5
snoDB668	snoU13	not_expressed	host_expressed	104	5	C/D	Orphan	protein_coding	False	simple_initiation	Other	8	8012	556	7352	7326	10	3	0.3	-21.9	-0.9	3
snoDB669	snoU13	not_expressed	intergenic	105	6	C/D	snRNA	intergenic	intergenic	intergenic	intergenic									-24.4	-5.2	3
snoDB670	snoU13	not_expressed	intergenic	96	6	C/D	Orphan	intergenic	intergenic	intergenic	intergenic									-23.1	-2.7	3
snoDB671	snoU13	not_expressed	intergenic	86	5	C/D	Orphan	intergenic	intergenic	intergenic	intergenic									-22.6	-1.1	3
snoDB672	snoU13	not_expressed	host_expressed	104	10	C/D	Orphan	protein_coding	False	simple_initiation	Other	28	14480	544	13832	13798	28	1	0.0357143	-19.3	-3.6	3
snoDB673	snoU13	not_expressed	host_expressed	104	7	C/D	rRNA	protein_coding	False	simple_initiation	Poorly characterized	2	183434	24856	158474	158449	24	23	0.958333	-17.4	-4.2	4
snoDB675	snoU13	not_expressed	intergenic	107	4	C/D	Orphan	intergenic	intergenic	intergenic	intergenic									-19.6	-3.2	4
snoDB677	snoU13	not_expressed	host_not_expressed	104	5	C/D	Orphan	non_coding	False	simple_initiation	non_functional_ncRNA	9	612	332	176	140	19	11	0.578947	-14.2	-4.7	0
snoDB678	snoU13	not_expressed	host_expressed	104	6	C/D	Orphan	protein_coding	True	simple_initiation	Other	5	6403	2469	3830	3805	13	9	0.692308	-23.7	-1.2	0
snoDB679	snoU13	not_expressed	intergenic	100	6	C/D	Orphan	intergenic	intergenic	intergenic	intergenic									-18.9	-4.5	3
snoDB686	snoU13	not_expressed	intergenic	110	7	C/D	Orphan	intergenic	intergenic	intergenic	intergenic									-19.7	-1.2	3
snoDB687	snoU13	not_expressed	intergenic	105	5	C/D	Orphan	intergenic	intergenic	intergenic	intergenic									-24.6	-0.9	3
snoDB690	snoU13	not_expressed	intergenic	103	6	C/D	Orphan	intergenic	intergenic	intergenic	intergenic									-19	-0.9	3
snoDB691	snoU13	not_expressed	intergenic	102	6	C/D	Orphan	intergenic	intergenic	intergenic	intergenic									-19.2	-3.4	4
snoDB701	snoU13	not_expressed	intergenic	98	7	C/D	Orphan	intergenic	intergenic	intergenic	intergenic									-21.3	-3.5	3
snoDB702	snoU13	not_expressed	intergenic	90	6	C/D	Orphan	intergenic	intergenic	intergenic	intergenic									-18.8	-2	5
snoDB705	U3	expressed	intergenic	83	6	C/D	Orphan	intergenic	intergenic	intergenic	intergenic									-19.4	-1.2	3
snoDB710	SNORA48	not_expressed	intergenic	121	6	H/ACA	Orphan	intergenic	intergenic	intergenic	intergenic									-26.9	-5	5
snoDB714	snoU13	expressed	host_expressed	103	11	C/D	Orphan	protein_coding	False	simple_initiation	Poorly characterized	0	0	0	0	0	5	0	0	-17.6	-2.9	5
snoDB718	snoU13	not_expressed	host_not_expressed	103	9	C/D	rRNA	non_coding	False	simple_initiation	non_functional_ncRNA	1	7055	1151	5801	5783	3	3	1	-22.1	-2.5	4
snoDB719	snoU13	not_expressed	intergenic	105	6	C/D	Orphan	intergenic	intergenic	intergenic	intergenic									-18.9	-1.3	3
snoDB723	snoU13	not_expressed	intergenic	111	5	C/D	Orphan	intergenic	intergenic	intergenic	intergenic									-22	-4.4	3
snoDB725	snoU13	not_expressed	host_expressed	104	6	C/D	rRNA	non_coding	False	simple_initiation	non_functional_ncRNA	1	50569	1407	49058	49015	2	2	1	-19.6	-5.8	6
snoDB726	snoU13	not_expressed	intergenic	113	10	C/D	Orphan	intergenic	intergenic	intergenic	intergenic									-24.9	-7.2	3
snoDB727	snoU13	not_expressed	host_not_expressed	105	4	C/D	Orphan	non_coding	False	simple_initiation	non_functional_ncRNA	0	0	0	0	0	1	0	0	-25.5	-10.1	8
snoDB728	snoU13	not_expressed	host_expressed	102	6	C/D	Orphan	non_coding	False	simple_initiation	functional_ncRNA	3	33425	7159	26164	26130	147	145	0.986395	-21.2	-2.9	3
snoDB732	snoU13	not_expressed	intergenic	103	11	C/D	Orphan	intergenic	intergenic	intergenic	intergenic									-16.9	-0.7	5
snoDB737	snoU13	not_expressed	host_expressed	107	6	C/D	Orphan	protein_coding	True	dual_initiation	Other	8	559	374	78	41	9	2	0.222222	-28.6	-4.6	4
snoDB746	snoU13	not_expressed	host_expressed	102	10	C/D	Orphan	protein_coding	False	simple_initiation	Poorly characterized	25	16550	9526	6922	6883	71	47	0.661972	-19.9	-3.7	2
snoDB751	U3	expressed	host_expressed	78	13	C/D	Orphan	protein_coding	False	simple_initiation	Poorly characterized	1	52449	9662	42709	42672	10	10	1	-21.4	-3.8	8
snoDB758	snoU13	not_expressed	intergenic	101	6	C/D	Orphan	intergenic	intergenic	intergenic	intergenic									-18.9	0	0
snoDB763	snoU13	not_expressed	intergenic	105	5	C/D	Orphan	intergenic	intergenic	intergenic	intergenic									-21.3	-1	3
snoDB764	snoU13	not_expressed	intergenic	76	9	C/D	Orphan	intergenic	intergenic	intergenic	intergenic									-12.1	-6.9	12
snoDB765	snoU13	not_expressed	host_expressed	104	6	C/D	Orphan	protein_coding	False	simple_initiation	Other	2	11105	529	10472	10444	3	2	0.666667	-24.8	-2	6
snoDB770	snoU13	not_expressed	host_expressed	103	6	C/D	Orphan	protein_coding	True	dual_initiation	RNA binding, processing, splicing	12	1670	1133	434	394	16	5	0.3125	-19.9	-3.4	0
snoDB771	snoU13	not_expressed	intergenic	104	7	C/D	Orphan	intergenic	intergenic	intergenic	intergenic									-23.5	-4	4
snoDB772	snoU13	not_expressed	intergenic	104	5	C/D	Orphan	intergenic	intergenic	intergenic	intergenic									-19	-3.9	9
snoDB776	SNORD71	not_expressed	host_not_expressed	59	6	C/D	rRNA	non_coding	False	simple_initiation	non_functional_ncRNA	2	69816	4046	65711	65688	4	3	0.75	-28	-6.2	1
snoDB779	snoU13	not_expressed	intergenic	106	6	C/D	Orphan	intergenic	intergenic	intergenic	intergenic									-25.4	-1.7	0
snoDB780	snoU13	expressed	host_expressed	102	5	C/D	Orphan	protein_coding	False	simple_initiation	Other	1	589257	95226	493929	493892	7	7	1	-29.5	-2	5
snoDB781	snoU13	not_expressed	intergenic	104	7	C/D	Orphan	intergenic	intergenic	intergenic	intergenic									-22.4	-1.3	3
snoDB786	snoU13	not_expressed	intergenic	110	7	C/D	Orphan	intergenic	intergenic	intergenic	intergenic									-19.2	-2.5	3
snoDB787	snoU13	not_expressed	host_expressed	105	5	C/D	Orphan	protein_coding	True	dual_initiation	Other	1	40653	22077	18471	18438	29	29	1	-29.2	-3.4	4
snoDB791	snoU13	not_expressed	host_expressed	97	5	C/D	Orphan	protein_coding	False	simple_initiation	Poorly characterized	4	4190	1591	2502	2466	5	2	0.4	-21.7	-4.5	0
snoDB792	snoU13	not_expressed	intergenic	104	5	C/D	Orphan	intergenic	intergenic	intergenic	intergenic									-21.6	-5.2	5
snoDB793	snoU13	not_expressed	intergenic	104	6	C/D	Orphan	intergenic	intergenic	intergenic	intergenic									-23.3	-4.3	0
snoDB794	snoU13	not_expressed	intergenic	86	6	C/D	rRNA	intergenic	intergenic	intergenic	intergenic									-14.5	-2.9	6
snoDB798	snoU13	not_expressed	intergenic	106	10	C/D	rRNA	intergenic	intergenic	intergenic	intergenic									-24.1	-2.9	5
snoDB802	snoU13	not_expressed	host_not_expressed	104	7	C/D	rRNA	protein_coding	False	simple_initiation	Poorly characterized	1	10387	9618	665	630	5	5	1	-25.7	-0.9	3
snoDB803	snoU13	not_expressed	intergenic	100	2	C/D	Orphan	intergenic	intergenic	intergenic	intergenic									-19.7	-3.6	4
snoDB804	snoU13	not_expressed	intergenic	101	6	C/D	Orphan	intergenic	intergenic	intergenic	intergenic									-14.1	-3	3
snoDB807	snoU13	not_expressed	host_expressed	81	7	C/D	rRNA	protein_coding	False	simple_initiation	Other	2	189326	123418	65827	65805	2	1	0.5	-19.2	-6.2	4
snoDB808	snoU13	not_expressed	host_expressed	122	6	C/D	Orphan	protein_coding	False	simple_initiation	Other	4	8926	8721	83	57	36	33	0.916667	-24.8	-6.2	8
snoDB809	snoU13	not_expressed	host_not_expressed	107	5	C/D	Orphan	non_coding	False	simple_initiation	non_functional_ncRNA	1	5137	2128	2902	2871	1	1	1	-25.8	-4.7	7
snoDB811	snoU13	not_expressed	intergenic	104	6	C/D	Orphan	intergenic	intergenic	intergenic	intergenic									-19	-3.4	5
snoDB813	snoU13	not_expressed	intergenic	100	11	C/D	Orphan	intergenic	intergenic	intergenic	intergenic									-26.5	-1.4	2
snoDB814	snoU13	not_expressed	intergenic	101	5	C/D	Orphan	intergenic	intergenic	intergenic	intergenic									-18.7	-9.6	5
snoDB815	snoU13	not_expressed	host_not_expressed	87	6	C/D	Orphan	non_coding	False	simple_initiation	non_functional_ncRNA	2	228286	98871	129328	129298	5	4	0.8	-15.9	-5.3	4
snoDB816	snoU13	not_expressed	intergenic	104	7	C/D	Orphan	intergenic	intergenic	intergenic	intergenic									-16.9	-2.8	3
snoDB821	snoU13	not_expressed	host_expressed	96	7	C/D	Orphan	protein_coding	False	simple_initiation	Other	5	223374	137503	85775	85736	6	2	0.333333	-24.4	-2.6	5
snoDB822	snoU13	not_expressed	intergenic	105	11	C/D	Orphan	intergenic	intergenic	intergenic	intergenic									-17.2	-4	4
snoDB824	snoU13	not_expressed	host_expressed	101	5	C/D	Orphan	protein_coding	False	simple_initiation	Poorly characterized	2	24964	334	24529	24490	3	2	0.666667	-18.8	-3.9	0
snoDB825	snoU13	not_expressed	host_not_expressed	114	9	C/D	Orphan	non_coding	False	simple_initiation	non_functional_ncRNA	2	126402	102978	23310	23288	3	2	0.666667	-13.8	-3.9	6
snoDB829	snoU13	not_expressed	intergenic	97	6	C/D	Orphan	intergenic	intergenic	intergenic	intergenic									-21.2	-11.8	8
snoDB831	U3	not_expressed	host_expressed	98	6	C/D	Orphan	protein_coding	False	dual_initiation	Other	2	31945	9361	22486	22447	15	14	0.933333	-22	-4	7
snoDB834	snoU13	not_expressed	intergenic	103	6	C/D	Orphan	intergenic	intergenic	intergenic	intergenic									-24	-3.1	4
snoDB835	snoU13	not_expressed	host_expressed	103	5	C/D	Orphan	protein_coding	False	simple_initiation	Poorly characterized	16	3806	3242	461	441	35	20	0.571429	-18.8	-3.3	4
snoDB836	snoU13	not_expressed	intergenic	106	6	C/D	Orphan	intergenic	intergenic	intergenic	intergenic									-19.6	-3.4	6
snoDB837	snoU13	not_expressed	intergenic	104	5	C/D	Orphan	intergenic	intergenic	intergenic	intergenic									-22	-9.3	6
snoDB839	snoU13	not_expressed	intergenic	102	7	C/D	Orphan	intergenic	intergenic	intergenic	intergenic									-23.7	-1.6	6
snoDB842	snoU13	not_expressed	intergenic	99	6	C/D	Orphan	intergenic	intergenic	intergenic	intergenic									-17.6	-2.3	5
snoDB843	snoU13	not_expressed	intergenic	98	8	C/D	Orphan	intergenic	intergenic	intergenic	intergenic									-19.7	-3.6	6
snoDB844	snoU13	not_expressed	host_expressed	104	5	C/D	Orphan	protein_coding	False	simple_initiation	Other	8	14297	8833	5360	5326	12	5	0.416667	-20.8	-4.2	6
snoDB845	snoU13	not_expressed	intergenic	104	6	C/D	Orphan	intergenic	intergenic	intergenic	intergenic									-29.7	-0.8	2
snoDB849	snoU13	not_expressed	intergenic	82	7	C/D	Orphan	intergenic	intergenic	intergenic	intergenic									-13	-2.9	4
snoDB856	snoU13	not_expressed	host_expressed	54	6	C/D	snRNA	protein_coding	True	simple_initiation	Poorly characterized	26	18669	17813	802	780	29	4	0.137931	-13.5	-4.1	5
snoDB857	snoU13	not_expressed	intergenic	104	6	C/D	Orphan	intergenic	intergenic	intergenic	intergenic									-26.4	-6.4	4
snoDB858	snoU13	not_expressed	intergenic	104	7	C/D	Orphan	intergenic	intergenic	intergenic	intergenic									-20.5	-6.3	4
snoDB859	snoU13	not_expressed	host_expressed	103	5	C/D	Orphan	protein_coding	False	dual_initiation	RNA binding, processing, splicing	16	1010	254	653	629	22	7	0.318182	-24.8	-1.6	5
snoDB860	snoU13	not_expressed	intergenic	100	6	C/D	Orphan	intergenic	intergenic	intergenic	intergenic									-26.4	-1.2	2
snoDB861	snoU13	not_expressed	intergenic	102	5	C/D	Orphan	intergenic	intergenic	intergenic	intergenic									-21.6	-5.7	7
snoDB864	snoU13	not_expressed	intergenic	102	5	C/D	Orphan	intergenic	intergenic	intergenic	intergenic									-20.4	-1.3	3
snoDB865	SNORD43	not_expressed	intergenic	65	7	C/D	rRNA	intergenic	intergenic	intergenic	intergenic									-10.7	-4.1	5
snoDB872	snoU13	not_expressed	intergenic	104	4	C/D	Orphan	intergenic	intergenic	intergenic	intergenic									-19	-1.2	3
snoDB873	snoU13	not_expressed	host_expressed	105	6	C/D	Orphan	protein_coding	False	simple_initiation	Other	6	20194	83	20006	19972	27	22	0.814815	-23.9	-1.8	0
snoDB874	snoU13	not_expressed	intergenic	98	8	C/D	rRNA	intergenic	intergenic	intergenic	intergenic									-29.8	-2.1	3
snoDB875	snoU13	not_expressed	host_expressed	104	5	C/D	Orphan	protein_coding	False	dual_initiation	Ribosome biogenesis & translation	5	5008	962	3942	3919	5	1	0.2	-14.2	-8.5	10
snoDB877	snoU13	not_expressed	intergenic	96	4	C/D	Orphan	intergenic	intergenic	intergenic	intergenic									-13.2	-5.2	0
snoDB878	snoU13	not_expressed	intergenic	109	4	C/D	Orphan	intergenic	intergenic	intergenic	intergenic									-28.4	-5.8	4
snoDB885	snoU13	not_expressed	host_not_expressed	97	5	C/D	Orphan	protein_coding	False	simple_initiation	Poorly characterized	5	9871	8979	795	773	8	4	0.5	-21.2	-2.7	4
snoDB886	snoU13	not_expressed	intergenic	102	8	C/D	Orphan	intergenic	intergenic	intergenic	intergenic									-20.2	-4.2	5
snoDB887	snoU13	not_expressed	intergenic	103	5	C/D	Orphan	intergenic	intergenic	intergenic	intergenic									-20.7	-2.8	0
snoDB893	snoU13	not_expressed	intergenic	61	11	C/D	Orphan	intergenic	intergenic	intergenic	intergenic									-13.3	-4.7	6
snoDB894	snoU13	not_expressed	intergenic	101	5	C/D	Orphan	intergenic	intergenic	intergenic	intergenic									-21.8	-1	3
snoDB895	snoU13	not_expressed	intergenic	103	10	C/D	Orphan	intergenic	intergenic	intergenic	intergenic									-28.1	-3.4	3
snoDB896	snoU13	not_expressed	intergenic	101	6	C/D	Orphan	intergenic	intergenic	intergenic	intergenic									-26.6	-3.3	4
snoDB899	snoU13	not_expressed	intergenic	104	4	C/D	Orphan	intergenic	intergenic	intergenic	intergenic									-21.1	-3.5	6
snoDB903	snoU13	not_expressed	host_expressed	99	11	C/D	Orphan	protein_coding	False	simple_initiation	Other	16	9853	2419	7335	7309	19	4	0.210526	-20.5	-7.9	11
snoDB910	snoU13	not_expressed	intergenic	103	6	C/D	Orphan	intergenic	intergenic	intergenic	intergenic									-12.1	-2.2	0
snoDB920	snoU13	not_expressed	host_expressed	96	4	C/D	Orphan	protein_coding	False	dual_initiation	Other	4	10874	10636	142	119	9	6	0.666667	-21.5	-5.8	5
snoDB924	snoU13	not_expressed	intergenic	104	5	C/D	Orphan	intergenic	intergenic	intergenic	intergenic									-19.9	-7.1	7
snoDB925	snoU13	not_expressed	intergenic	103	4	C/D	Orphan	intergenic	intergenic	intergenic	intergenic									-25.8	-0.1	4
snoDB927	U3	not_expressed	host_not_expressed	101	8	C/D	Orphan	protein_coding	False	simple_initiation	Other	1	2989	826	2062	2019	5	5	1	-19.2	-3.3	8
snoDB931	snoU13	not_expressed	intergenic	109	8	C/D	Orphan	intergenic	intergenic	intergenic	intergenic									-26.4	-4.9	4
snoDB932	snoU13	not_expressed	intergenic	103	10	C/D	Orphan	intergenic	intergenic	intergenic	intergenic									-16.7	-4.7	5
snoDB933	snoU13	not_expressed	intergenic	98	5	C/D	Orphan	intergenic	intergenic	intergenic	intergenic									-17.9	-2.8	5
snoDB934	snoU13	not_expressed	intergenic	105	5	C/D	Orphan	intergenic	intergenic	intergenic	intergenic									-18.8	-2.3	0
snoDB936	snoU13	not_expressed	intergenic	94	6	C/D	Orphan	intergenic	intergenic	intergenic	intergenic									-19.3	-4.2	5
snoDB937	snoU13	not_expressed	intergenic	102	5	C/D	Orphan	intergenic	intergenic	intergenic	intergenic									-18.4	-5.2	6
snoDB939	U3	not_expressed	host_expressed	76	10	C/D	Orphan	protein_coding	True	dual_initiation	Other	6	10285	955	9254	9221	6	1	0.166667	-26	-3.2	5
snoDB940	U3	not_expressed	intergenic	110	7	C/D	Orphan	intergenic	intergenic	intergenic	intergenic									-25	-1	3
snoDB946	snoU13	not_expressed	intergenic	105	6	C/D	Orphan	intergenic	intergenic	intergenic	intergenic									-17.9	-1	3
snoDB947	snoU13	not_expressed	intergenic	140	5	C/D	Orphan	intergenic	intergenic	intergenic	intergenic									-27.1	-9	8
snoDB949	snoU13	not_expressed	host_expressed	102	10	C/D	Orphan	protein_coding	False	simple_initiation	Other	4	22948	1952	20894	20857	16	13	0.8125	-14.2	-2.5	6
snoDB950	snoU13	not_expressed	intergenic	104	6	C/D	snRNA	intergenic	intergenic	intergenic	intergenic									-17.4	-3.4	5
snoDB958	snoU13	not_expressed	host_expressed	101	5	C/D	Orphan	protein_coding	False	simple_initiation	Other	5	20147	1727	18319	18287	10	6	0.6	-15.9	-5	11
snoDB959	snoU13	not_expressed	intergenic	104	5	C/D	Orphan	intergenic	intergenic	intergenic	intergenic									-22.3	-2.2	4
snoDB963	snoU13	not_expressed	host_expressed	100	6	C/D	Orphan	protein_coding	True	dual_initiation	Other	4	12994	610	12284	12258	13	10	0.769231	-21.2	-2.9	3
snoDB965	snoU13	not_expressed	intergenic	107	5	C/D	Orphan	intergenic	intergenic	intergenic	intergenic									-25.4	-2.2	3
snoDB966	snoU13	not_expressed	intergenic	100	9	C/D	Orphan	intergenic	intergenic	intergenic	intergenic									-23.7	-2.1	7
snoDB971	snoU13	not_expressed	intergenic	104	7	C/D	Orphan	intergenic	intergenic	intergenic	intergenic									-18.8	-1.1	4
snoDB974	snoU13	not_expressed	host_expressed	114	8	C/D	Orphan	protein_coding	False	simple_initiation	Poorly characterized	12	1183	291	778	753	17	6	0.352941	-15.9	-3.7	6
snoDB975	snoU13	not_expressed	host_expressed	102	9	C/D	Orphan	protein_coding	True	dual_initiation	Other	2	408078	129530	278446	278421	3	2	0.666667	-19.1	-0.2	0
snoDB976	snoU13	not_expressed	host_not_expressed	104	9	C/D	Orphan	protein_coding	False	simple_initiation	Poorly characterized	1	55992	5324	50564	50538	23	23	1	-24.7	-3.4	4
snoDB977	snoU13	not_expressed	intergenic	104	4	C/D	Orphan	intergenic	intergenic	intergenic	intergenic									-26.3	-2.7	6
snoDB978	snoU13	not_expressed	host_expressed	91	5	C/D	Orphan	protein_coding	True	dual_initiation	Other	4	4135	1598	2446	2408	8	5	0.625	-15	-2.7	3
snoDB979	snoU13	not_expressed	host_expressed	99	6	C/D	Orphan	protein_coding	False	simple_initiation	Other	2	62977	49695	13183	13157	8	7	0.875	-20	-4.9	5
snoDB992	snoU13	not_expressed	intergenic	100	4	C/D	Orphan	intergenic	intergenic	intergenic	intergenic									-24	-2.6	5
snoDB993	snoU13	not_expressed	host_expressed	110	5	C/D	rRNA	protein_coding	True	simple_initiation	Other	1	50550	23539	26901	26868	58	58	1	-21.5	-5.8	4
snoDB994	snoU13	not_expressed	intergenic	105	4	C/D	Orphan	intergenic	intergenic	intergenic	intergenic									-23.8	-1.2	3
snoDB995	U3	expressed	host_expressed	74	10	C/D	Orphan	protein_coding	False	dual_initiation	Poorly characterized	2	15470	12402	2994	2970	3	2	0.666667	-28.6	-3.3	4
snoDB999	snoU13	not_expressed	intergenic	91	11	C/D	Orphan	intergenic	intergenic	intergenic	intergenic									-18.6	-9.8	11
